# Supplementary material for: Aerobic oxidative C–H phosphorylation of quinoxalines under catalyst-free conditions
Source: Royal Society of Chemistry journal article supplement (doi:10.1039/d3cc02848h), 2023-01-01
Supplement: d3cc02848h1.pdf [file d3cc02848h1.pdf]

# **Aerobic Oxidative C-H Phosphorylation of Quinoxalines under Catalyst-free Conditions**

Qiaoyu Gan,<sup>a,b</sup> Haibo Liu,<sup>b</sup> Zeqi Jiang,<sup>b</sup> Junmei Xia,<sup>b</sup> Zhenhua Gao,<sup>b,\*</sup> Yongbiao Guo,<sup>b,\*</sup> Hongliang Wen<sup>a,\*</sup>

<sup>a</sup> China School of Chemistry & Chemical Engineering, Beijing Institute of Technology, Beijing 102488, P. R. China.

<sup>b</sup> State Key Laboratory of NBC Protection for Civilian Research, Beijing 102205, P. R. China.

E-mail: [yan87120@126.com](mailto:yan87120@126.com); [gaozhenhua1223@163.com](mailto:gaozhenhua1223@163.com); [wen.hongliang@bit.edu.cn](mailto:wen.hongliang@bit.edu.cn)

## **Supporting Information**

### **Table of Contents**

|                                                                                        |    |
|----------------------------------------------------------------------------------------|----|
| <b>1. Reaction conditions optimization for the Phosphonation of Quinoxalines</b> ..... | 2  |
| <b>2. Experimental Section and compound characterization</b> .....                     | 2  |
| <b>3. NMR spectrum of 3, 5 and 6</b> .....                                             | 20 |

# 1. Reaction conditions optimization for the Phosphonation of Quinoxalines

Supplementary Table 1. Selected optimization studies <sup>[a]</sup>

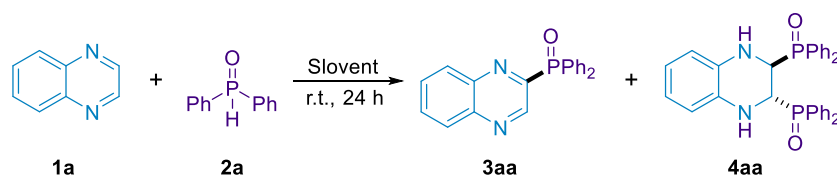

| Entry            | 1a/2a | Solvent                         | Yield (%) |       |
|------------------|-------|---------------------------------|-----------|-------|
|                  |       |                                 | 3aa       | 4aa   |
| 1                | 1/1.1 | n-hexane                        | 33        | 21    |
| 2                | 1/1.1 | CCl <sub>4</sub>                | 70        | 2     |
| 3                | 1/1.1 | toluene                         | 54        | 10    |
| 4                | 1/1.1 | Et <sub>2</sub> O               | 36        | 28    |
| 5                | 1/1.1 | CH <sub>2</sub> Cl <sub>2</sub> | 40        | 2     |
| 6                | 1/1.1 | THF                             | 40        | 10    |
| 7                | 1/1.1 | EtOAc                           | 53        | 14    |
| 8                | 1/1.1 | EtOH                            | 9         | < 0.1 |
| 9                | 1/1.1 | <i>i</i> -PrOH                  | 15        | < 0.1 |
| 10               | 1/1.1 | MeOH                            | 5         | < 0.1 |
| 11               | 1/1.1 | 1,4-Dioxane                     | 54        | 8     |
| 12               | 1/1.1 | Actone                          | 16        | 2     |
| 13               | 1/1.1 | CH <sub>3</sub> CN              | 49        | 25    |
| 14               | 1/1.1 | DMF                             | 16        | 2     |
| 15               | 1/1.1 | DMSO                            | 40        | 20    |
| 16               | 1/1.1 | CHCl <sub>3</sub>               | 10        | < 0.1 |
| 17               | 1/1.1 | 1,2-dichlorethane               | 73        | < 0.1 |
| 18               | 1/1.1 | 1-bromo-2-chlorethane           | 40        | 1     |
| 19 <sup>c</sup>  | 1/1.1 | 1,2-dichlorethane               | 87        | < 0.1 |
| 20 <sup>d</sup>  | 1/1.1 | 1,2-dichlorethane               | 88        | 1     |
| 21 <sup>ce</sup> | 1/1.1 | 1,2-dichlorethane               | 92(90)    | 0     |
| 22 <sup>ce</sup> | 1/1.2 | 1,2-dichlorethane               | 92        | 0     |

<sup>a</sup>Reaction conditions: **1a** (0.1 mmol) and **2a** (0.11 mmol) in solvent(2 mL) under N<sub>2</sub> for 24 h. <sup>b</sup>Yield was determined by HPLC analysis. <sup>c</sup>Solvent (1 mL). <sup>d</sup>Solvent (0.5 mL) <sup>e</sup> under air.

## 2. Experimental Section and compound characterization

**General information:** Reagents and solvents were purchased from common commercial suppliers and were used without further purification. Column chromatography was generally performed on silica gel (200-300 mesh). Melting points were determined with a Büchi B-545 melting-point apparatus. 600MHz <sup>1</sup>H NMR and 150MHz <sup>13</sup>C NMR spectra were recorded on Varian VMS-600 spectrometers, respectively. The chemical shifts are reported in ppm ( $\delta$  scale) relative to internal tetramethylsilane, and coupling constants are reported in hertz (Hz). High-resolution mass spectra (HRMS) were obtained on Agilent 6502 Q-TOF HPLC and mass spectrometry.

**Synthesis of monophosphorylated product 3.** A mixture of quinoxalines **1** (0.2 mmol) and diarylphosphine oxides or diphenylphosphonate **2** (0.22 mmol), and 1,2-dichlorethane (2 mL) was stirred at room temperature for 24 h, and directly charged onto silica gel. The product was isolated using hexane/ethyl acetate (2/1~1:2) as eluent.

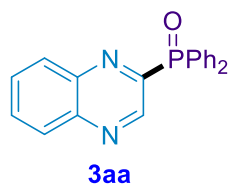

**diphenyl(quinoxalin-2-yl)phosphine oxide (3aa).** Yield, 91%;  $^1\text{H}$  NMR (600 MHz,  $\text{CDCl}_3$ )  $\delta$  9.64 (s, 1H), 8.25 – 8.19 (m, 1H), 8.17 (d,  $J = 7.8$  Hz, 1H), 8.01 – 7.92 (m, 4H), 7.92 – 7.86 (m, 1H), 7.87 – 7.81 (m, 1H), 7.56 (td,  $J = 7.4, 1.0$  Hz, 2H), 7.49 (td,  $J = 7.6, 3.0$  Hz, 4H);  $^{13}\text{C}$  NMR (151 MHz,  $\text{CDCl}_3$ )  $\delta$  152.54 (d,  $J = 124.0$  Hz), 145.66 (d,  $J = 22.2$  Hz), 142.43 (d,  $J = 17.1$  Hz), 141.73, 132.38, 132.36, 132.33, 132.15 (2), 132.09 (2), 131.53, 130.99, 130.83, 130.24, 129.14, 128.62 (2), 128.53 (2);  $^{31}\text{P}$  NMR (243 MHz,  $\text{CDCl}_3$ ):  $\delta$  (ppm) 20.46. HRMS ( $m/z$ ) calcd for  $\text{C}_{20}\text{H}_{16}\text{N}_2\text{OP}[\text{M}+\text{H}]^+$  331.0966, found 331.0958.

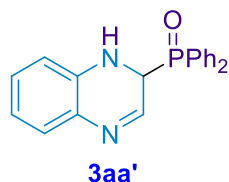

**(1,2-dihydroquinoxalin-2-yl)diphenylphosphine oxide (3aa').**  $^1\text{H}$  NMR (600 MHz,  $\text{CD}_2\text{Cl}_2$ )  $\delta$  8.45 (s, 1H), 8.16 (td,  $J = 8.5, 1.3$  Hz, 2H), 7.94 (ddd,  $J = 14.1, 7.7, 6.4$  Hz, 4H), 7.87 (dtd,  $J = 16.7, 6.9, 1.5$  Hz, 2H), 7.73 – 7.66 (m, 5H), 7.65 (s, 1H), 3.54 – 3.32 (m, 1H).

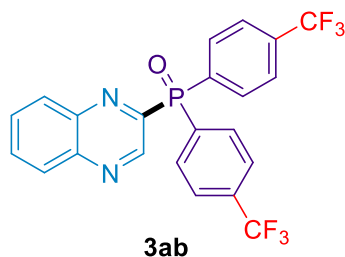

**quinoxalin-2-ylbis(4-(trifluoromethyl)phenyl)phosphine oxide (3ab).** Yield, 78%;  $^1\text{H}$  NMR (600 MHz,  $\text{CDCl}_3$ )  $\delta$  9.70 – 9.66 (m, 1H), 8.22 (dd,  $J = 8.4, 1.0$  Hz, 1H), 8.20 – 8.12 (m, 5H), 7.91 (m, 2H), 7.77 (dd,  $J = 8.4, 2.2$  Hz, 4H);  $^{13}\text{C}$  NMR (151 MHz,  $\text{CDCl}_3$ )  $\delta$  150.48 (d,  $J = 127.4$  Hz), 146.20 (d,  $J = 22.4$  Hz), 142.91 (d,  $J = 2.3$  Hz), 142.11 (d,  $J = 17.5$  Hz), 135.28 (d,  $J = 102.8$  Hz), 134.73 – 133.93 (m), 132.61, 132.55 (2), 132.49 (2), 131.28, 130.04, 129.79 (d,  $J = 1.6$  Hz), 125.66 – 125.55 (m), 125.52 (m), 134.30, 122.49;  $^{31}\text{P}$  NMR (243 MHz,  $\text{CDCl}_3$ ):  $\delta$  (ppm) 16.79;  $^{19}\text{F}$  NMR (282 MHz,  $\text{CDCl}_3$ )  $\delta$  -104.94 – -105.62 (m). HRMS ( $m/z$ ) calcd for  $\text{C}_{22}\text{H}_{14}\text{F}_6\text{N}_2\text{OP}[\text{M}+\text{H}]^+$  467.467.0742, found 467.0738.

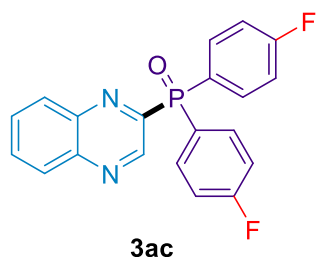

**bis(4-fluorophenyl)(quinoxalin-2-yl)phosphine oxide (3ac).** Yield, 80%;  $^1\text{H}$  NMR (600 MHz,  $\text{CDCl}_3$ )  $\delta$  9.65 (s, 1H), 8.24 (dd,  $J = 8.3, 0.8$  Hz, 1H), 8.16 (dd,  $J = 8.3, 1.1$  Hz, 1H), 8.00 – 7.94 (m, 4H), 7.93 – 7.89 (m, 1H), 7.89 – 7.85 (m, 1H), 7.18 (tdd,  $J = 6.5, 4.4, 2.2$  Hz, 4H);  $^{13}\text{C}$  NMR (151 MHz,  $\text{CDCl}_3$ )  $\delta$  165.40 (dd,  $J = 254.6, 3.3$  Hz), 151.93 (d,  $J = 126.5$  Hz), 145.73 (d,  $J = 22.4$  Hz), 142.28 (d,  $J = 17.2$  Hz), 142.11, 134.70 (2), 134.64 (2), 134.63 (2), 134.57 (2), 132.47, 131.15, 130.09, 129.37, 127.10 (dd,  $J = 108.7, 3.3$  Hz), 116.31 – 115.93 (4);  $^{31}\text{P}$  NMR (243 MHz,  $\text{CDCl}_3$ ):  $\delta$  (ppm) 18.94;  $^{19}\text{F}$  NMR (282 MHz,  $\text{CDCl}_3$ )  $\delta$  -63.30. HRMS ( $m/z$ ) calcd for  $\text{C}_{20}\text{H}_{14}\text{F}_2\text{N}_2\text{OP}[\text{M}+\text{H}]^+$  367.0806, found 367.0800.

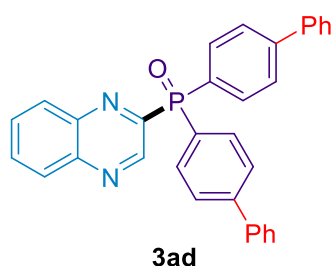

**di([1,1'-biphenyl]-4-yl)(quinoxalin-2-yl)phosphine oxide (3ad).** Yield, 70%;  $^1\text{H}$  NMR (600 MHz,  $\text{CDCl}_3$ )  $\delta$  9.67 (s, 1H), 8.21 (dd,  $J = 17.2, 8.2$  Hz, 2H), 8.04 (dd,  $J = 11.6, 8.2$  Hz, 4H), 7.86 (dt,  $J = 14.6, 7.0$  Hz, 2H), 7.70 (dd,  $J = 7.9, 2.1$  Hz, 4H), 7.62 – 7.54 (m, 4H), 7.42 (t,  $J = 7.6$  Hz, 4H), 7.36 (dd,  $J = 8.2, 6.5$  Hz, 2H);  $^{13}\text{C}$  NMR (151 MHz,  $\text{CDCl}_3$ )  $\delta$  171.15, 152.55 (d,  $J = 124.8$  Hz), 145.86 (d,  $J = 22.2$  Hz), 145.21 (d,  $J = 2.6$  Hz), 142.46 (d,  $J = 17.0$  Hz), 141.97, 139.81, 132.69 (2), 132.63 (2), 132.30, 131.00, 130.26, 129.80 (d,  $J = 106.4$  Hz), 129.29, 128.96 (4), 128.24, 127.35(2), 127.29 (4), 127.27 (2);  $^{31}\text{P}$  NMR (243 MHz,  $\text{CDCl}_3$ ):  $\delta$  (ppm) 20.43. HRMS ( $m/z$ ) calcd for  $\text{C}_{32}\text{H}_{24}\text{N}_2\text{OP}[\text{M}+\text{H}]^+$  483.1621, found 483.1624.

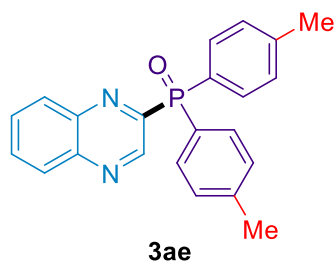

**quinoxalin-2-yl-di-p-tolylphosphine oxide (3ae).** Yield, 60%;  $^1\text{H}$  NMR (600 MHz,  $\text{CDCl}_3$ )  $\delta$  9.60 (s, 1H), 8.25 (d,  $J = 8.4$  Hz, 1H), 8.17 (dd,  $J = 8.3, 0.7$  Hz, 1H), 7.91 – 7.87 (m, 1H), 7.85 (dd,  $J = 8.3, 1.3$  Hz, 1H), 7.81 (dd,  $J = 12.0, 8.1$  Hz, 4H), 7.29 (dd,  $J = 8.0, 2.7$  Hz, 4H), 2.40 (s, 6H);  $^{13}\text{C}$  NMR (151

MHz, CDCl<sub>3</sub>) δ 153.12 (d, *J* = 123.6 Hz), 145.40 (d, *J* = 22.3 Hz), 142.97 (d, *J* = 2.8 Hz), 142.54 (d, *J* = 16.9 Hz), 141.35, 132.31, 132.19 (2), 132.13 (2), 130.97, 130.26, 129.37 (2), 129.29 (2), 128.94, 127.92 (d, *J* = 107.8 Hz), 21.65, 21.64; <sup>31</sup>P NMR (243 MHz, CDCl<sub>3</sub>): δ (ppm) 21.41. HRMS (*m/z*) calcd for C<sub>22</sub>H<sub>20</sub>N<sub>2</sub>OP[M+H]<sup>+</sup> 359.1308, found 359.1307.

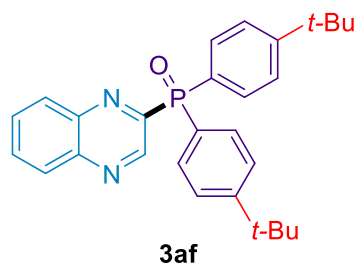

**bis(4-(tert-butyl)phenyl)(quinoxalin-2-yl)phosphine oxide (3af)**. Yield, 67%; <sup>1</sup>H NMR (600 MHz, CDCl<sub>3</sub>) δ 9.61 (s, 1H), 8.27 (d, *J* = 8.2 Hz, 1H), 8.22 (d, *J* = 8.1 Hz, 1H), 7.89 (dd, *J* = 11.9, 8.4 Hz, 6H), 7.50 (dd, *J* = 8.3, 2.6 Hz, 4H), 1.31 (s, 18H); <sup>13</sup>C NMR (151 MHz, CDCl<sub>3</sub>) δ 155.89, 155.87, 153.32 (d, *J* = 123.2 Hz), 145.22 (d, *J* = 22.4 Hz), 142.62 (d, *J* = 16.8 Hz), 141.09, 132.38, 132.04 (2), 131.97 (2), 131.02, 130.31, 128.80, 127.87 (d, *J* = 107.8 Hz), 125.67 (2), 125.59 (2), 35.05 (2), 31.05 (6); <sup>31</sup>P NMR (243 MHz, CDCl<sub>3</sub>): δ (ppm) 20.43. HRMS (*m/z*) calcd for C<sub>28</sub>H<sub>32</sub>N<sub>2</sub>OP[M+H]<sup>+</sup> 443.2247, found 433.2252.

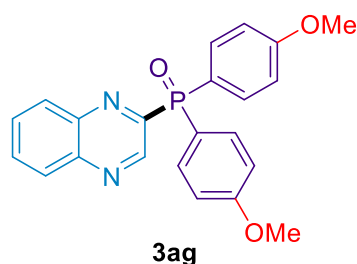

**bis(4-(tert-butyl)phenyl)(quinoxalin-2-yl)phosphine oxide (3ag)**. Yield, 67%; <sup>1</sup>H NMR (600 MHz, CDCl<sub>3</sub>) δ 9.60 (s, 1H), 8.31 – 8.24 (m, 1H), 8.17 (d, *J* = 7.6 Hz, 1H), 7.91 – 7.87 (m, 1H), 7.87 – 7.81 (m, 5H), 6.98 (dd, *J* = 8.8, 2.3 Hz, 4H), 3.84 (s, 6H); <sup>13</sup>C NMR (151 MHz, CDCl<sub>3</sub>) δ 162.85, 162.83, 153.40 (d, *J* = 124.5 Hz), 145.20 (d, *J* = 22.3 Hz), 142.57 (d, *J* = 16.9 Hz), 141.12, 134.11 (2), 134.04 (2), 132.35, 131.02, 130.23, 128.82, 122.25 (d, *J* = 112.4 Hz), 114.24 (2), 114.15 (2), 55.36 (2); <sup>31</sup>P NMR (243 MHz, CDCl<sub>3</sub>): δ (ppm) 21.54. HRMS (*m/z*) calcd for C<sub>22</sub>H<sub>20</sub>N<sub>2</sub>O<sub>3</sub>P[M+H]<sup>+</sup> 391.1206, found 391.1210.

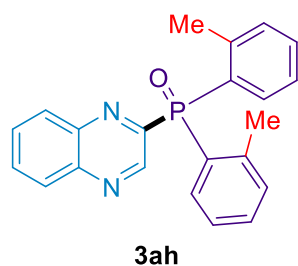

**quinoxalin-2-yl-di-o-tolylphosphine oxide (3ah)**. Yield, 56%; <sup>1</sup>H NMR (600 MHz, CDCl<sub>3</sub>) δ 9.56 (s,

1H), 8.28 (dd,  $J = 8.4, 0.7$  Hz, 1H), 8.16 – 8.08 (m, 1H), 7.91 (ddd,  $J = 8.4, 7.0, 1.3$  Hz, 1H), 7.85 (ddd,  $J = 8.3, 7.0, 1.3$  Hz, 1H), 7.47 (dd,  $J = 10.6, 4.4$  Hz, 2H), 7.44 – 7.38 (m, 2H), 7.31 (dd,  $J = 7.5, 4.5$  Hz, 2H), 7.24 – 7.18 (m, 2H), 2.48 (s, 6H);  $^{13}\text{C}$  NMR (151 MHz,  $\text{CDCl}_3$ )  $\delta$  153.04 (d,  $J = 122.6$  Hz), 146.20 (d,  $J = 22.9$  Hz), 143.11 (d,  $J = 8.6$  Hz), 142.29 (d,  $J = 17.0$  Hz), 141.32, 133.08 (d,  $J = 12.0$  Hz, 2C), 132.49 (d,  $J = 2.6$  Hz, 2C), 132.40, 131.99 (d,  $J = 11.0$  Hz, 2C), 131.00, 130.38, 129.38 (d,  $J = 103.0$  Hz), 128.96, 125.62 (d,  $J = 12.9$  Hz, 2C), 21.89 (d,  $J = 4.2$  Hz, 2C);  $^{31}\text{P}$  NMR (243 MHz,  $\text{CDCl}_3$ ):  $\delta$  (ppm) 29.81. HRMS ( $m/z$ ) calcd for  $\text{C}_{22}\text{H}_{20}\text{N}_2\text{OP}[\text{M}+\text{H}]^+$  359.1308, found 359.1310.

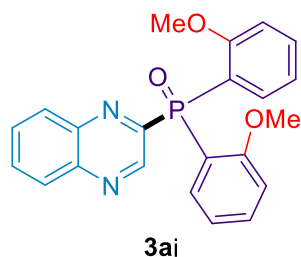

**bis(2-methoxyphenyl)(quinoxalin-2-yl)phosphine oxide (3ai).** Yield, 80%;  $^1\text{H}$  NMR (600 MHz,  $\text{CDCl}_3$ )  $\delta$  8.93 (s, 1H), 8.37 – 8.31 (m, 2H), 7.95 – 7.85 (m, 2H), 7.75 (ddd,  $J = 14.3, 7.6, 1.6$  Hz, 2H), 7.61 (dd,  $J = 11.6, 4.1$  Hz, 2H), 7.13 (td,  $J = 7.5, 1.7$  Hz, 2H), 6.95 (dd,  $J = 8.2, 5.6$  Hz, 2H), 3.58 (s, 6H);  $^{13}\text{C}$  NMR (151 MHz,  $\text{CDCl}_3$ )  $\delta$  160.71 (d,  $J = 2.9$  Hz, 2C), 155.60 (d,  $J = 131.4$  Hz), 143.78 (d,  $J = 29.8$  Hz), 143.33 (d,  $J = 17.2$  Hz), 137.66, 135.08, 135.07, 134.86 (d,  $J = 7.9$  Hz, 2C), 132.60, 131.16, 130.63, 126.87, 121.40 (d,  $J = 12.4$  Hz, 2C), 117.71 (d,  $J = 109.1$  Hz, 2C), 111.25 (d,  $J = 6.6$  Hz, 2C), 55.56 (2);  $^{31}\text{P}$  NMR (243 MHz,  $\text{CDCl}_3$ ):  $\delta$  (ppm) 18.47. HRMS ( $m/z$ ) calcd for  $\text{C}_{22}\text{H}_{20}\text{N}_2\text{O}_3\text{P}[\text{M}+\text{H}]^+$  391.1206, found 391.1200.

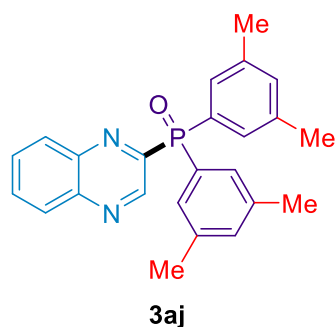

**bis(3,5-dimethylphenyl)(quinoxalin-2-yl)phosphine oxide (3aj).** Yield, 88%;  $^1\text{H}$  NMR (600 MHz,  $\text{CDCl}_3$ )  $\delta$  9.58 (s, 1H), 8.27 (dd,  $J = 8.4, 1.0$  Hz, 1H), 8.21 (dd,  $J = 8.3, 1.0$  Hz, 1H), 7.93 – 7.88 (m, 1H), 7.86 (ddd,  $J = 8.3, 7.0, 1.4$  Hz, 1H), 7.53 (s, 2H), 7.51 (s, 2H), 7.18 (s, 2H), 2.33 (s, 12H);  $^{13}\text{C}$  NMR (151 MHz,  $\text{CDCl}_3$ )  $\delta$  153.16 (d,  $J = 122.5$  Hz), 145.40 (d,  $J = 22.3$  Hz), 142.63 (d,  $J = 16.8$  Hz), 141.25, 138.40 (2), 138.31 (2), 134.21 (d,  $J = 2.8$  Hz), 132.34, 130.99, 130.76 (d,  $J = 104.2$  Hz), 130.34, 129.69 (2), 129.62 (2), 128.88, 21.33 (4);  $^{31}\text{P}$  NMR (243 MHz,  $\text{CDCl}_3$ ):  $\delta$  (ppm) 21.87. HRMS ( $m/z$ ) calcd for  $\text{C}_{24}\text{H}_{24}\text{N}_2\text{OP}[\text{M}+\text{H}]^+$  387.1621, found 387.1625.

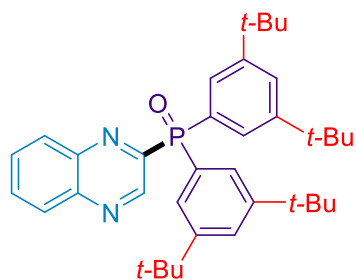

**3ak**

**bis(3,5-di-tert-butylphenyl)(quinoxalin-2-yl)phosphine oxide (3ak).** Yield, 80%;  $^1\text{H}$  NMR (600 MHz,  $\text{CDCl}_3$ )  $\delta$  9.63 (s, 1H), 8.28 (dd,  $J = 8.2, 1.1$  Hz, 1H), 8.18 (dd,  $J = 8.2, 1.4$  Hz, 1H), 7.97 (d,  $J = 1.8$  Hz, 2H), 7.95 (d,  $J = 1.8$  Hz, 2H), 7.91 – 7.85 (m, 2H), 7.60 (d,  $J = 0.9$  Hz, 2H), 1.31 (s, 36H);  $^{13}\text{C}$  NMR (151 MHz,  $\text{CDCl}_3$ )  $\delta$  154.29 (d,  $J = 119.7$  Hz), 151.08 (2), 151.00 (2), 144.99, 142.74, 140.90, 132.25, 131.14, 130.65, 129.97 (2), 128.76, 126.45 (2), 126.35 (2), 126.28 (2), 35.13 (4), 31.35 (12);  $^{31}\text{P}$  NMR (243 MHz,  $\text{CDCl}_3$ ):  $\delta$  (ppm) 19.20. HRMS ( $m/z$ ) calcd for  $\text{C}_{36}\text{H}_{48}\text{N}_2\text{OP}[\text{M}+\text{H}]^+$  555.3499, found 555.3500.

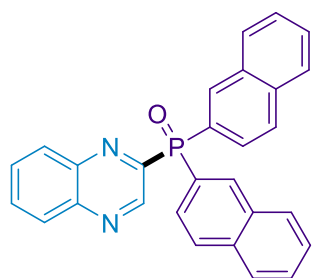

**3am**

**di(naphthalen-2-yl)(quinoxalin-2-yl)phosphine oxide (3am).** Yield, 70%;  $^1\text{H}$  NMR (600 MHz,  $\text{CDCl}_3$ )  $\delta$  9.66 (s, 1H), 8.72 (d,  $J = 8.5$  Hz, 2H), 8.24 (d,  $J = 8.4$  Hz, 1H), 8.07 (d,  $J = 8.3$  Hz, 2H), 8.00 (d,  $J = 8.4$  Hz, 1H), 7.92 (d,  $J = 8.2$  Hz, 2H), 7.90 – 7.83 (m, 1H), 7.81 – 7.75 (m, 1H), 7.69 (dd,  $J = 16.2, 7.1$  Hz, 2H), 7.53 – 7.48 (m, 2H), 7.46 – 7.39 (m, 4H);  $^{13}\text{C}$  NMR (151 MHz,  $\text{CDCl}_3$ )  $\delta$  152.99 (d,  $J = 124.3$  Hz), 146.18 (d,  $J = 23.4$  Hz), 142.30 (d,  $J = 17.2$  Hz), 141.47, 134.11, 134.04, 133.90 (d,  $J = 9.6$  Hz), 133.85 (2), 133.83 (2), 133.74 (d,  $J = 8.6$  Hz), 132.39, 130.93, 130.41, 128.95 (2), 127.58 (d,  $J = 3.6$  Hz), 127.30 (d,  $J = 5.2$  Hz), 126.90 (2), 126.58 (2), 124.54, 124.44;  $^{31}\text{P}$  NMR (243 MHz,  $\text{CDCl}_3$ ):  $\delta$  (ppm) 30.62. HRMS ( $m/z$ ) calcd for  $\text{C}_{28}\text{H}_{20}\text{N}_2\text{OP}[\text{M}+\text{H}]^+$  431.1308, found 431.1315.

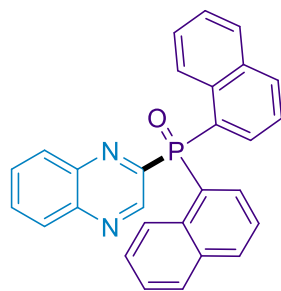

**3an**

**di(naphthalen-1-yl)(quinoxalin-2-yl)phosphine oxide (3an).** Yield, 85%;  $^1\text{H}$  NMR (600 MHz,  $\text{CDCl}_3$ )  $\delta$  9.73 (s, 1H), 8.58 (d,  $J = 14.2$  Hz, 2H), 8.26 (d,  $J = 8.3$  Hz, 1H), 8.19 (d,  $J = 8.4$  Hz, 1H), 8.01 – 7.83 (m, 10H), 7.65 – 7.58 (m, 2H), 7.58 – 7.52 (m, 2H);  $^{13}\text{C}$  NMR (151 MHz,  $\text{CDCl}_3$ )  $\delta$  152.64 (d,  $J = 124.5$  Hz), 145.80 (d,  $J = 22.3$  Hz), 142.50 (d,  $J = 17.0$  Hz), 141.81, 134.92 (d,  $J = 2.3$  Hz), 134.39, 134.33, 132.47, 132.38, 131.04, 130.26, 129.18, 129.09 (2), 128.53 (2), 128.49, 128.41, 128.30 (d,  $J = 105.6$  Hz), 127.85 (2), 127.03 (2), 126.83, 126.76 ;  $^{31}\text{P}$  NMR (243 MHz,  $\text{CDCl}_3$ ):  $\delta$  (ppm) 21.32. HRMS (m/z) calcd for  $\text{C}_{28}\text{H}_{20}\text{N}_2\text{OP}[\text{M}+\text{H}]^+$  431.1308, found 431.1311.

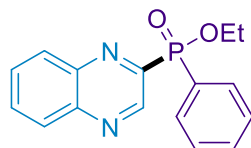

**3ao**

**ethyl phenyl(quinoxalin-2-yl)phosphinate (3ao).** Yield, 76%;  $^1\text{H}$  NMR (600 MHz,  $\text{CDCl}_3$ )  $\delta$  9.44 (s, 1H), 8.21 – 8.15 (m, 1H), 8.13 (dd,  $J = 8.3, 1.0$  Hz, 1H), 8.07 – 7.99 (m, 2H), 7.82 (dtd,  $J = 16.6, 6.9, 1.4$  Hz, 2H), 7.59 – 7.53 (m, 1H), 7.48 (td,  $J = 7.6, 3.7$  Hz, 2H), 4.35 – 4.12 (m, 2H), 1.42 (t,  $J = 7.0$  Hz, 3H);  $^{13}\text{C}$  NMR (151 MHz,  $\text{CDCl}_3$ )  $\delta$  150.68 (d,  $J = 161.6$  Hz), 146.26 (d,  $J = 24.9$  Hz), 142.81 (d,  $J = 2.4$  Hz), 142.47 (d,  $J = 18.6$  Hz), 132.90 (d,  $J = 2.8$  Hz), 132.43, 132.36, 132.02, 130.71, 130.32 (d,  $J = 0.9$  Hz), 129.49 (d,  $J = 1.9$  Hz), 129.39 (d,  $J = 140.0$  Hz), 128.66, 128.57, 62.29 (d,  $J = 6.3$  Hz), 16.56 (d,  $J = 6.3$  Hz);  $^{31}\text{P}$  NMR (243 MHz,  $\text{CDCl}_3$ )  $\delta$  24.30; HRMS (m/z) calcd for  $\text{C}_{16}\text{H}_{16}\text{N}_2\text{O}_2\text{P}[\text{M}+\text{H}]^+$  299.0945, found 299.0950.

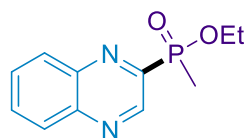

**3ap**

**ethyl methyl(quinoxalin-2-yl)phosphinate (3ap).** Yield, 67%;  $^1\text{H}$  NMR (600 MHz,  $\text{CDCl}_3$ )  $\delta$  9.42 (s, 1H), 8.25 – 8.11 (m, 2H), 7.97 – 7.72 (m, 2H), 4.29 – 4.14 (m, 1H), 4.04 – 3.91 (m, 1H), 1.92 (d,  $J = 15.1$  Hz, 3H), 1.31 (t,  $J = 7.0$  Hz, 3H);  $^{13}\text{C}$  NMR (151 MHz,  $\text{CDCl}_3$ )  $\delta$  150.29 (d,  $J = 152.0$  Hz), 145.74 (d,  $J = 23.7$  Hz), 143.07 (d,  $J = 2.4$  Hz), 142.36 (d,  $J = 18.6$  Hz), 132.06 (s), 130.86 (s), 130.07 (d,  $J = 1.0$  Hz), 129.57 (d,  $J = 1.9$  Hz), 61.63 (d,  $J = 6.5$  Hz), 16.42 (d,  $J = 6.3$  Hz), 13.67 (d,  $J = 104.3$  Hz);  $^{31}\text{P}$  NMR (243 MHz,  $\text{CDCl}_3$ )  $\delta$  39.24 (s); HRMS (m/z) calcd for  $\text{C}_{11}\text{H}_{14}\text{N}_2\text{O}_2\text{P}[\text{M}+\text{H}]^+$  237.0788, found 237.0797.

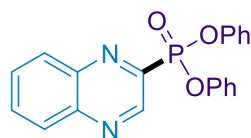

**3aq**

**diphenyl quinoxalin-2-ylphosphonate (3aq).** Yield, 70%;  $^1\text{H}$  NMR (600 MHz,  $\text{CDCl}_3$ )  $\delta$  9.42 (s, 1H),



8.34 – 8.28 (m, 1H), 8.20 (dd,  $J = 8.3, 1.2$  Hz, 1H), 7.95-7.89 (m, 2H), 7.35 – 7.29 (m, 8H), 7.20 – 7.16 (m, 2H);  $^{13}\text{C}$  NMR (151 MHz,  $\text{CDCl}_3$ )  $\delta$  150.03 (d,  $J = 8.0$  Hz), 147.00, 145.48, 146.31 (d,  $J = 29.7$  Hz), 143.07 (d,  $J = 2.8$  Hz), 142.42 (d,  $J = 22.5$  Hz), 132.75, 131.22, 130.45 (d,  $J = 1.5$  Hz), 129.86 (4), 129.53 (d,  $J = 2.3$  Hz), 125.61 (2), 120.78 (2), 120.75 (2).  $^{31}\text{P}$  NMR (243 MHz,  $\text{CDCl}_3$ ):  $\delta$  (ppm) 0.96. HRMS ( $m/z$ ) calcd for  $\text{C}_{20}\text{H}_{16}\text{N}_2\text{O}_3\text{P}[\text{M}+\text{H}]^+$  363.0893, found 363.0890.

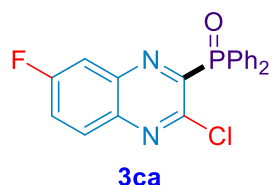

**(3-chloro-7-fluoroquinoxalin-2-yl)diphenylphosphine oxide (3ca)**. Yield, 47%;  $^1\text{H}$  NMR (600 MHz,  $\text{CDCl}_3$ )  $\delta$  8.07 (dd,  $J = 9.2, 5.4$  Hz, 1H), 7.79 (dd,  $J = 12.2, 7.6$  Hz, 4H), 7.69 – 7.64 (m, 1H), 7.64 – 7.58 (m, 3H), 7.53 (td,  $J = 7.5, 2.7$  Hz, 4H);  $^{13}\text{C}$  NMR (151 MHz,  $\text{CDCl}_3$ )  $\delta$  162.97 (d,  $J = 255.3$  Hz), 151.36 (d,  $J = 126.7$  Hz), 148.09, 140.66, 140.66, 139.13, 132.71 (d,  $J = 2.3$  Hz), 132.14 (2), 132.08 (2), 130.43 (d,  $J = 9.8$  Hz), 129.54 (d,  $J = 109.8$  Hz), 128.72 (2), 128.64 (2), 123.73 (d,  $J = 26.2$  Hz), 113.74 (d,  $J = 21.7$  Hz), 110.08 (d,  $J = 209.3$  Hz);  $^{31}\text{P}$  NMR (243 MHz,  $\text{CDCl}_3$ ):  $\delta$  (ppm) 29.46. HRMS ( $m/z$ ) calcd for  $\text{C}_{20}\text{H}_{14}\text{ClFN}_2\text{OP}[\text{M}+\text{H}]^+$  383.0511, found 383.0510.

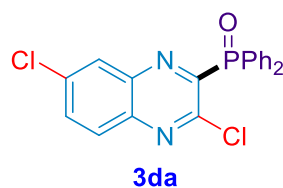

**(3,7-dichloroquinoxalin-2-yl)diphenylphosphine oxide (3da)**. Yield, 81%;  $^1\text{H}$  NMR (600 MHz,  $\text{CDCl}_3$ )  $^1\text{H}$  NMR (600 MHz,  $\text{CDCl}_3$ )  $\delta$  7.99 (d,  $J = 9.0$  Hz, 1H), 7.95 (d,  $J = 2.2$  Hz, 1H), 7.83 – 7.75 (m, 5H), 7.61 (td,  $J = 7.5, 1.1$  Hz, 2H), 7.52 (td,  $J = 7.7, 3.1$  Hz, 4H);  $^{13}\text{C}$  NMR (151 MHz,  $\text{CDCl}_3$ )  $\delta$  152.11 (d,  $J = 124.9$  Hz), 149.02 (d,  $J = 21.3$  Hz), 140.30, 140.03 (d,  $J = 15.8$  Hz), 136.66, 134.03 (2), 132.46, 134.44, 132.07 (2), 132.01 (2), 130.22 (d,  $J = 109.2$  Hz), 129.46 (d,  $J = 1.6$  Hz), 128.87, 128.57 (2), 128.49 (2);  $^{31}\text{P}$  NMR (243 MHz,  $\text{CDCl}_3$ ):  $\delta$  (ppm) 27.67. HRMS ( $m/z$ ) calcd for  $\text{C}_{20}\text{H}_{14}\text{Cl}_2\text{N}_2\text{OP}[\text{M}+\text{H}]^+$  399.0215, found 399.0210.

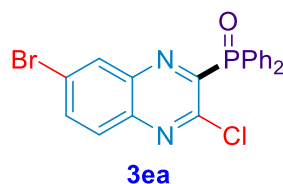

**(7-bromo-3-chloroquinoxalin-2-yl)diphenylphosphine oxide (3ea)**. Yield, 54%;  $^1\text{H}$  NMR (600 MHz,  $\text{CDCl}_3$ )  $\delta$  8.23 (d,  $J = 1.9$  Hz, 1H), 7.87 – 7.76 (m, 6H), 7.60 (dd,  $J = 10.7, 4.2$  Hz, 2H), 7.51 (td,  $J = 7.7, 3.0$  Hz, 4H);  $^{13}\text{C}$  NMR (151 MHz,  $\text{CDCl}_3$ )  $\delta$  151.29 (d,  $J = 125.6$  Hz), 149.81 (d,  $J = 21.2$  Hz), 142.22, 138.63 (d,  $J = 15.7$  Hz), 134.36, 132.41 (d,  $J = 2.7$  Hz), 132.08 (2), 132.01 (2), 131.23,

130.64, 129.93, 128.56 (2), 128.48 (2), 127.76;  $^{31}\text{P}$  NMR (243 MHz,  $\text{CDCl}_3$ ):  $\delta$  (ppm) 27.59. HRMS (m/z) calcd for  $\text{C}_{20}\text{H}_{14}\text{BrClN}_2\text{OP}[\text{M}+\text{H}]^+$  442.9710, found 442.9705.

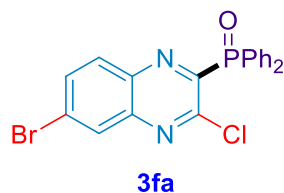

**(6-bromo-3-chloroquinoxalin-2-yl)diphenylphosphine oxide (3fa)**. Yield, 59%;  $^1\text{H}$  NMR (600 MHz,  $\text{CDCl}_3$ )  $\delta$  8.23 (d,  $J = 1.9$  Hz, 1H), 7.87 – 7.76 (m, 6H), 7.60 (dd,  $J = 10.7, 4.2$  Hz, 2H), 7.51 (td,  $J = 7.7, 3.0$  Hz, 4H);  $^{13}\text{C}$  NMR (151 MHz,  $\text{CDCl}_3$ )  $\delta$  152.00 (d,  $J = 125.0$  Hz), 149.10 (d,  $J = 21.6$  Hz), 140.57, 140.27 (d,  $J = 15.7$  Hz), 136.58 (2), 132.48, 132.46, 132.24, 132.08 (2), 132.01 (2), 130.12 (d,  $J = 109.2$  Hz), 129.51, 128.60 (2), 128.51 (2), 124.76;  $^{31}\text{P}$  NMR (243 MHz,  $\text{CDCl}_3$ ):  $\delta$  (ppm) 27.87. HRMS (m/z) calcd for  $\text{C}_{20}\text{H}_{14}\text{BrClN}_2\text{OP}[\text{M}+\text{H}]^+$  442.9710, found 442.9715.

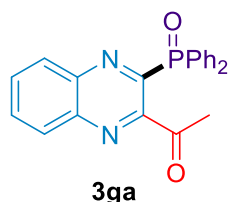

**1-(3-(diphenylphosphoryl)quinoxalin-2-yl)ethan-1-one (3ga)**. Yield, 66%;  $^1\text{H}$  NMR (600 MHz,  $\text{CDCl}_3$ )  $\delta$  8.18 – 8.13 (m, 1H), 8.02 (d,  $J = 8.3$  Hz, 1H), 7.92 – 7.87 (m, 1H), 7.87 – 7.81 (m, 5H), 7.54 (td,  $J = 7.4, 1.3$  Hz, 2H), 7.50 – 7.44 (m, 4H), 2.84 (s, 3H);  $^{13}\text{C}$  NMR (151 MHz,  $\text{CDCl}_3$ )  $\delta$  199.22, 170.15, 152.62 (d,  $J = 19.5$  Hz), 149.91 (d,  $J = 122.9$  Hz), 140.29 (d,  $J = 16.9$  Hz), 139.03, 131.51, 131.34, 131.10 (2), 131.03 (2), 130.89, 130.87, 130.78, 130.62, 129.01, 128.65 (d,  $J = 1.8$  Hz), 127.29 (2), 127.20 (2), 26.65;  $^{31}\text{P}$  NMR (243 MHz,  $\text{CDCl}_3$ ):  $\delta$  (ppm) 24.99. HRMS (m/z) calcd for  $\text{C}_{22}\text{H}_{18}\text{N}_2\text{O}_2\text{P}[\text{M}+\text{H}]^+$  373.1100, found 373.1109.

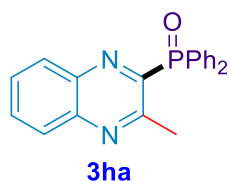

**(3-methylquinoxalin-2-yl)diphenylphosphine oxide (3ha)**. Yield, 35%;  $^1\text{H}$  NMR (600 MHz,  $\text{CDCl}_3$ )  $\delta$  7.99 (d,  $J = 8.4$  Hz, 1H), 7.73 (d,  $J = 8.3$  Hz, 1H), 7.61 (dd,  $J = 11.3, 4.0$  Hz, 1H), 7.56 (dd,  $J = 12.0, 7.3$  Hz, 4H), 7.50 (t,  $J = 7.6$  Hz, 1H), 7.32 (td,  $J = 7.4, 0.9$  Hz, 2H), 7.24 (td,  $J = 7.7, 3.0$  Hz, 4H), 2.83 (s, 3H);  $^{13}\text{C}$  NMR (151 MHz,  $\text{CDCl}_3$ )  $\delta$  155.89 (d,  $J = 22.9$  Hz), 152.42 (d,  $J = 123.5$  Hz), 140.40 (d,  $J = 17.5$  Hz), 139.24, 132.83, 132.27, 132.25, 132.17 (2), 132.11 (2), 131.16 (d,  $J = 106.2$  Hz), 130.15, 130.05, 128.54 (2), 128.46 (2), 127.19, 22.75.  $^{31}\text{P}$  NMR (243 MHz,  $\text{CDCl}_3$ ):  $\delta$  (ppm) 27.10. HRMS (m/z) calcd for  $\text{C}_{21}\text{H}_{18}\text{N}_2\text{OP}[\text{M}+\text{H}]^+$  345.1151, found 345.1153.

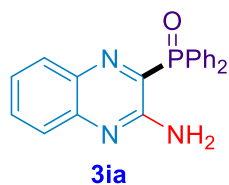

**(3-aminoquinoxalin-2-yl)diphenylphosphine oxide (3ia)**. Yield, 89%;  $^1\text{H}$  NMR (600 MHz,  $\text{CDCl}_3$ )  $\delta$  7.98 – 7.92 (m, 4H), 7.87 (d,  $J = 8.3$  Hz, 1H), 7.70 – 7.64 (m, 2H), 7.59 (td,  $J = 7.4, 1.2$  Hz, 2H), 7.50 (td,  $J = 7.7, 3.3$  Hz, 4H), 7.43 (ddd,  $J = 8.3, 6.0, 2.3$  Hz, 1H);  $^{13}\text{C}$   $^{13}\text{C}$  NMR (151 MHz,  $\text{CDCl}_3$ )  $\delta$  153.19 (d,  $J = 20.8$  Hz), 141.85 (d,  $J = 124.9$  Hz), 136.70 (d,  $J = 17.2$  Hz), 133.23, 132.63, 132.61, 132.17 (d,  $J = 9.4$  Hz), 132.16 (2), 132.10 (2), 130.67 (d,  $J = 106.6$  Hz), 129.97, 128.65 (2), 128.57 (2), 125.68, 123.71;  $^{31}\text{P}$  NMR (243 MHz,  $\text{CDCl}_3$ ):  $\delta$  (ppm) 26.07. HRMS (m/z) calcd for  $\text{C}_{20}\text{H}_{17}\text{N}_3\text{OP}[\text{M}+\text{H}]^+$  346.1104, found 346.1102.

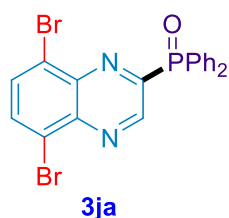

**(5,8-dibromoquinoxalin-2-yl)diphenylphosphine oxide (3ja)**. Yield, 61%;  $^1\text{H}$  NMR (600 MHz,  $\text{CDCl}_3$ )  $\delta$  9.77 (s, 1H), 8.17 – 8.09 (m, 4H), 8.03 (m, 2H), 7.58 – 7.53 (m, 2H), 7.53 – 7.47 (m, 4H);  $^{13}\text{C}$  NMR (151 MHz,  $\text{CDCl}_3$ )  $\delta$  154.31 (d,  $J = 121.2$  Hz), 147.44, 147.30, 141.31 (d,  $J = 2.3$  Hz), 140.63 (d,  $J = 16.5$  Hz), 135.17, 134.11, 132.39, 132.37, 132.13 (2), 132.06 (2), 131.05 (d,  $J = 105.2$  Hz), 128.65 (2), 128.57 (2), 125.00, 124.15 (d,  $J = 2.5$  Hz).  $^{31}\text{P}$  NMR (243 MHz,  $\text{CDCl}_3$ ):  $\delta$  (ppm) 17.38. HRMS (m/z) calcd for  $\text{C}_{20}\text{H}_{14}\text{Br}_2\text{N}_2\text{OP}[\text{M}+\text{H}]^+$  486.9205, found 486.9200.

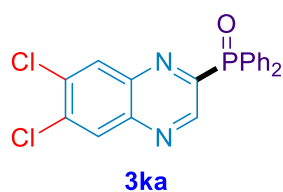

**(6,7-dichloroquinoxalin-2-yl)diphenylphosphine oxide (3ka)**. Yield, 67%;  $^1\text{H}$  NMR (600 MHz,  $\text{CDCl}_3$ )  $\delta$  9.63 (s, 1H), 8.29 (d,  $J = 6.1$  Hz, 2H), 7.96 – 7.85 (m, 4H), 7.61 – 7.53 (m, 2H), 7.50 (m, 4H);  $^{13}\text{C}$  NMR (151 MHz,  $\text{CDCl}_3$ )  $\delta$  153.74 (d,  $J = 121.2$  Hz), 147.42, 147.28, 141.33 (d,  $J = 1.8$  Hz), 140.70 (d,  $J = 17.4$  Hz), 136.89, 135.76, 132.52, 132.50, 132.10 (2), 132.04 (2), 130.87 (d,  $J = 105.3$  Hz), 130.52, 130.21 (d,  $J = 1.8$  Hz), 128.68 (2), 128.60 (2);  $^{31}\text{P}$  NMR (243 MHz,  $\text{CDCl}_3$ ):  $\delta$  (ppm) 17.38. HRMS (m/z) calcd for  $\text{C}_{20}\text{H}_{14}\text{Cl}_2\text{N}_2\text{OP}[\text{M}+\text{H}]^+$  399.0215, found 399.0211.

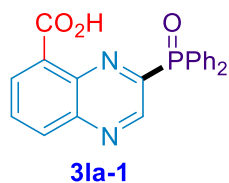

**3-(diphenylphosphoryl)quinoxaline-5-carboxylic acid (3la-1).** Yield, 48%;  $^1\text{H}$  NMR (600 MHz,  $\text{CDCl}_3$ )  $\delta$  13.41 (s, 1H), 9.78 (s, 1H), 8.88 (d,  $J = 7.2$  Hz, 1H), 8.47 (d,  $J = 8.3$  Hz, 1H), 8.08 (t,  $J = 7.9$  Hz, 1H), 7.81 (dd,  $J = 12.2, 7.7$  Hz, 4H), 7.67 (t,  $J = 7.3$  Hz, 2H), 7.57 (td,  $J = 7.5, 2.7$  Hz, 4H);  $^{13}\text{C}$  NMR (151 MHz,  $\text{CDCl}_3$ )  $\delta$  151.55 (d,  $J = 113.6$  Hz), 147.70 (d,  $J = 19.4$  Hz), 143.10, 138.71 (d,  $J = 14.1$  Hz), 137.02, 135.10, 133.43, 133.41, 132.38, 132.02 (2), 131.95 (2), 129.33 (2), 129.24 (2), 129.02 (d,  $J = 106.7$  Hz), 125.35;  $^{31}\text{P}$  NMR (243 MHz,  $\text{CDCl}_3$ ):  $\delta$  (ppm) 24.87. HRMS ( $m/z$ ) calcd for  $\text{C}_{21}\text{H}_{15}\text{N}_2\text{O}_3\text{P}[\text{M}+\text{H}]^+$  375.0893, found 375.0899.

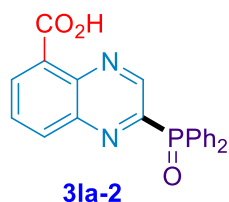

**2-(diphenylphosphoryl)quinoxaline-5-carboxylic acid (3la-2).** Yield, 48%;  $^1\text{H}$  NMR (600 MHz,  $\text{CDCl}_3$ )  $\delta$  9.67 (s, 1H), 8.95 (dd,  $J = 7.3, 1.0$  Hz, 1H), 8.45 (d,  $J = 8.4$  Hz, 1H), 8.09 – 8.02 (m, 1H), 7.96 (dd,  $J = 12.0, 7.6$  Hz, 4H), 7.60 (t,  $J = 7.3$  Hz, 2H), 7.52 (td,  $J = 7.6, 2.8$  Hz, 4H);  $^{13}\text{C}$  NMR (151 MHz,  $\text{CDCl}_3$ )  $\delta$  151.55 (d,  $J = 113.6$  Hz), 147.70 (d,  $J = 19.4$  Hz), 143.10, 138.71 (d,  $J = 14.1$  Hz), 137.02, 135.10, 133.43, 133.41, 132.38, 132.02 (2), 131.95 (2), 129.33 (2), 129.24 (2), 129.02 (d,  $J = 106.7$  Hz), 125.35;  $^{31}\text{P}$  NMR (243 MHz,  $\text{CDCl}_3$ ):  $\delta$  (ppm) 20.26. HRMS ( $m/z$ ) calcd for  $\text{C}_{21}\text{H}_{15}\text{N}_2\text{O}_3\text{P}[\text{M}+\text{H}]^+$  375.0893, found 375.0897.

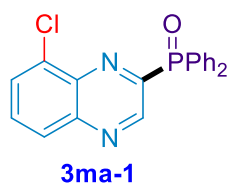

**(8-chloroquinoxalin-2-yl)diphenylphosphine oxide (3ma-1).** Yield, 71%;  $^1\text{H}$  NMR (600 MHz,  $\text{CDCl}_3$ )  $\delta$  9.70 (s, 1H), 8.10 (dd,  $J = 8.5, 1.1$  Hz, 1H), 7.97 (dd,  $J = 7.5, 1.2$  Hz, 1H), 7.96 – 7.91 (m, 4H), 7.76 (dd,  $J = 8.4, 7.6$  Hz, 1H), 7.59 – 7.55 (m, 2H), 7.49 (ddd,  $J = 7.4, 4.0, 2.4$  Hz, 4H);  $^{13}\text{C}$  NMR (151 MHz,  $\text{CDCl}_3$ )  $\delta$  153.44 (d,  $J = 122.2$  Hz), 146.73 (d,  $J = 22.1$  Hz), 143.07 (d,  $J = 17.0$  Hz), 139.50 (d,  $J = 2.4$  Hz), 133.60 (d,  $J = 2.3$  Hz), 132.45, 132.43, 132.17 (2), 132.10 (2), 131.72, 131.04 (d,  $J = 105.2$  Hz), 130.42, 129.28, 128.65 (2), 128.57 (2);  $^{31}\text{P}$  NMR (243 MHz,  $\text{CDCl}_3$ ):  $\delta$  (ppm) 20.56. HRMS ( $m/z$ ) calcd for  $\text{C}_{20}\text{H}_{15}\text{ClN}_2\text{OP}[\text{M}+\text{H}]^+$  365.0605, found 365.0600.

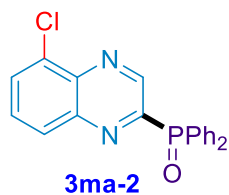

**(5-chloroquinoxalin-2-yl)diphenylphosphine oxide (3ma-2).** Yield, 71%;  $^1\text{H}$  NMR (600 MHz,  $\text{CDCl}_3$ )  $\delta$  9.73 (s, 1H), 8.12 (ddd,  $J = 11.0, 9.1, 4.1$  Hz, 5H), 7.94 (dd,  $J = 7.5, 1.1$  Hz, 1H), 7.79 (dd,  $J = 8.3, 7.8$  Hz, 1H), 7.57 – 7.52 (m, 2H), 7.52 – 7.46 (m, 4H);  $^{13}\text{C}$  NMR (151 MHz,  $\text{CDCl}_3$ )  $\delta$  152.90 (d,  $J = 123.2$  Hz), 146.82 (d,  $J = 21.5$  Hz), 143.59 (d,  $J = 2.2$  Hz), 138.97 (d,  $J = 16.6$  Hz), 134.36, 132.29, 132.27, 132.09 (2), 132.03 (2), 131.60, 131.35 (d,  $J = 104.8$  Hz), 130.57, 128.65 (d,  $J = 1.7$  Hz), 128.61 (2), 128.53 (2);  $^{31}\text{P}$  NMR (243 MHz,  $\text{CDCl}_3$ ):  $\delta$  (ppm) 17.65. HRMS (m/z) calcd for  $\text{C}_{20}\text{H}_{15}\text{ClN}_2\text{OP}[\text{M}+\text{H}]^+$  365.0605, found 365.0607.

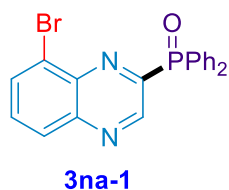

**(8-bromoquinoxalin-2-yl)diphenylphosphine oxide (3na-1).** Yield, 91%;  $^1\text{H}$  NMR (600 MHz,  $\text{CDCl}_3$ )  $\delta$  9.68 (s, 1H), 8.18 (dd,  $J = 7.5, 1.1$  Hz, 1H), 8.14 (dd,  $J = 8.5, 0.9$  Hz, 1H), 7.96 – 7.90 (m, 4H), 7.69 (dd,  $J = 8.3, 7.7$  Hz, 1H), 7.57 (td,  $J = 7.4, 1.2$  Hz, 2H), 7.49 (td,  $J = 7.6, 3.1$  Hz, 4H);  $^{13}\text{C}$  NMR (151 MHz,  $\text{CDCl}_3$ )  $\delta$  153.39 (d,  $J = 122.3$  Hz), 147.00 (d,  $J = 22.2$  Hz), 143.13 (d,  $J = 17.1$  Hz), 140.40 (d,  $J = 2.2$  Hz), 135.30, 132.46, 132.44, 132.17 (2), 132.10 (2), 131.01 (d,  $J = 105.3$  Hz), 130.99, 130.04, 128.66 (2), 128.58 (2), 124.51 (d,  $J = 2.6$  Hz);  $^{31}\text{P}$  NMR (243 MHz,  $\text{CDCl}_3$ ):  $\delta$  (ppm) 20.58. HRMS (m/z) calcd for  $\text{C}_{20}\text{H}_{15}\text{BrN}_2\text{OP}[\text{M}+\text{H}]^+$  409.0100, found 409.0110.

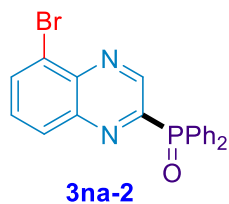

**(5-bromoquinoxalin-2-yl)diphenylphosphine oxide (3na-2).** Yield, 91%;  $^1\text{H}$  NMR (600 MHz,  $\text{CDCl}_3$ )  $\delta$  9.70 (s, 1H), 8.16 (dt,  $J = 10.3, 4.7$  Hz, 6H), 7.73 (t,  $J = 8.0$  Hz, 1H), 7.55 (td,  $J = 7.4, 1.3$  Hz, 2H), 7.50 (ddd,  $J = 7.2, 5.4, 2.6$  Hz, 4H);  $^{13}\text{C}$  NMR (151 MHz,  $\text{CDCl}_3$ )  $\delta$  153.13 (d,  $J = 124.0$  Hz), 146.77 (d,  $J = 21.4$  Hz), 143.65, 139.85 (d,  $J = 16.6$  Hz), 134.14, 132.32, 132.30, 132.17, 132.13 (2), 132.07(2), 131.21 (d,  $J = 104.9$  Hz), 129.40, 128.63 (2), 128.55 (2), 125.41;  $^{31}\text{P}$  NMR (243 MHz,  $\text{CDCl}_3$ ):  $\delta$  (ppm) 17.48. HRMS (m/z) calcd for  $\text{C}_{20}\text{H}_{15}\text{BrN}_2\text{OP}[\text{M}+\text{H}]^+$  409.0100, found 409.0108.

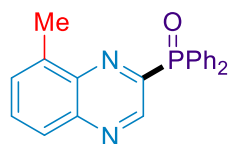

**3oa-1**

**(8-methylquinoxalin-2-yl)diphenylphosphine oxide (3oa-1)** Yield, 88%;  $^1\text{H}$  NMR (600 MHz,  $\text{CDCl}_3$ )  $\delta$  9.60 (s, 1H), 7.99 (dd,  $J = 7.6, 2.1$  Hz, 1H), 7.98 – 7.92 (m, 4H), 7.74 – 7.68 (m, 2H), 7.55 (td,  $J = 7.4, 1.2$  Hz, 2H), 7.48 (td,  $J = 7.6, 3.0$  Hz, 4H), 2.83 (s, 3H);  $^{13}\text{C}$  NMR (151 MHz,  $\text{CDCl}_3$ )  $\delta$  151.56 (d,  $J = 124.9$  Hz), 145.12 (d,  $J = 22.3$  Hz), 142.43 (d,  $J = 17.0$  Hz), 141.71, 138.02, 132.26, 132.25, 132.17 (2), 132.11 (2), 131.87, 131.80, 131.10, 130.51, 128.56 (2), 128.48 (2), 128.04, 17.29;  $^{31}\text{P}$  NMR (243 MHz,  $\text{CDCl}_3$ ):  $\delta$  (ppm) 20.71; HRMS ( $m/z$ ) calcd for  $\text{C}_{21}\text{H}_{18}\text{N}_2\text{OP}[\text{M}+\text{H}]^+$  345.1151, found 345.1148.

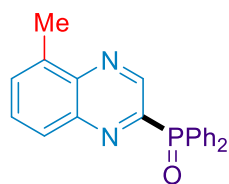

**3oa-2**

**(5-methylquinoxalin-2-yl)diphenylphosphine oxide (3oa-2)**. Yield, 88%;  $^1\text{H}$  NMR (600 MHz,  $\text{CDCl}_3$ )  $\delta$  9.64 (s, 1H), 8.09 (d,  $J = 8.5$  Hz, 1H), 8.03 – 7.93 (m, 4H), 7.83 – 7.75 (m, 1H), 7.69 (d,  $J = 7.0$  Hz, 1H), 7.56 (td,  $J = 7.4, 1.3$  Hz, 2H), 7.52 – 7.44 (m, 4H), 2.75 (s, 3H);  $^{13}\text{C}$  NMR (151 MHz,  $\text{CDCl}_3$ )  $\delta$  150.98 (d,  $J = 125.6$  Hz), 145.10 (d,  $J = 22.4$  Hz), 141.62 (d,  $J = 16.4$  Hz), 138.57, 132.37, 132.29, 132.27, 132.12 (2), 132.06 (2), 131.46 (d,  $J = 104.9$  Hz), 130.95, 128.54 (2), 128.46 (2), 126.78, 126.78, 17.11;  $^{31}\text{P}$  NMR (243 MHz,  $\text{CDCl}_3$ ):  $\delta$  (ppm) 20.20; HRMS ( $m/z$ ) calcd for  $\text{C}_{21}\text{H}_{18}\text{N}_2\text{OP}[\text{M}+\text{H}]^+$  345.1151, found 345.1147.

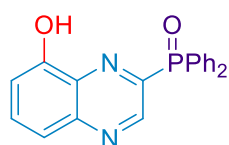

**3pa-1**

**(8-hydroxyquinoxalin-2-yl)diphenylphosphine oxide (3pa-1)**. Yield, 60%;  $^1\text{H}$  NMR (600 MHz,  $\text{CDCl}_3$ )  $\delta$  9.53 (s, 1H), 8.00 – 7.93 (m, 4H), 7.77 – 7.72 (m, 1H), 7.69 (d,  $J = 8.4$  Hz, 1H), 7.59 – 7.54 (m, 2H), 7.49 (td,  $J = 7.6, 3.0$  Hz, 4H), 7.33 (d,  $J = 7.5$  Hz, 1H);  $^{13}\text{C}$  NMR (151 MHz,  $\text{CDCl}_3$ )  $\delta$  153.13 (d,  $J = 124.4$  Hz), 152.11, 143.75 (d,  $J = 22.6$  Hz), 142.62 (d,  $J = 17.4$  Hz), 132.41, 132.40, 132.15 (2), 132.08 (2), 131.99, 131.46, 130.76, 128.63 (2), 128.55 (2), 120.45, 112.77;  $^{31}\text{P}$  NMR (243 MHz,  $\text{CDCl}_3$ ):  $\delta$  (ppm) 20.73; HRMS ( $m/z$ ) calcd for  $\text{C}_{20}\text{H}_{16}\text{N}_2\text{O}_2\text{P}[\text{M}+\text{H}]^+$  347.0944, found 347.0945.

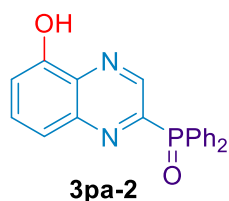

**(5-hydroxyquinoxalin-2-yl)diphenylphosphine oxide (3pa-2).** Yield, 60%;  $^1\text{H}$  NMR (600 MHz,  $\text{CDCl}_3$ )  $\delta$  9.54 (s, 1H), 7.82 (dt,  $J = 7.7, 7.0$  Hz, 5H), 7.73 (d,  $J = 8.3$  Hz, 1H), 7.61 (t,  $J = 7.0$  Hz, 2H), 7.52 (td,  $J = 7.6, 2.9$  Hz, 4H), 7.29 (d,  $J = 7.7$  Hz, 1H);  $^{13}\text{C}$  NMR (151 MHz,  $\text{CDCl}_3$ )  $\delta$  152.36, 149.14 (d,  $J = 122.1$  Hz), 147.12 (d,  $J = 22.0$  Hz), 143.00, 133.80, 132.71 (d,  $J = 2.4$  Hz), 132.15 (2), 132.08 (2), 130.62 (d,  $J = 105.5$  Hz), 128.93, 128.83 (2), 128.75 (2), 119.91, 112.02 (2);  $^{31}\text{P}$  NMR (243 MHz,  $\text{CDCl}_3$ ):  $\delta$  (ppm) 23.42; HRMS ( $m/z$ ) calcd for  $\text{C}_{20}\text{H}_{16}\text{N}_2\text{O}_2\text{P}[\text{M}+\text{H}]^+$  347.0944, found 347.0947.

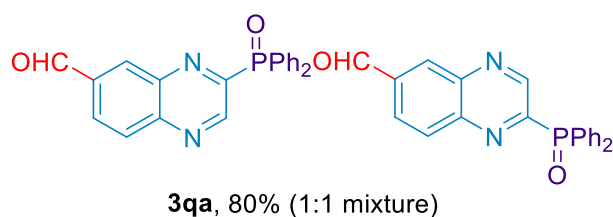

**2 or 3-(diphenylphosphoryl)quinoxaline-6-carbaldehyde (3qa).** Yield, 80%;  $^1\text{H}$  NMR (600 MHz,  $\text{CDCl}_3$ )  $\delta$  10.29 (s, 1H), 9.75 (s, 1H), 8.65 (s, 1H), 8.37 – 8.23 (m, 2H), 7.97 (dd,  $J = 11.9, 7.8$  Hz, 4H), 7.59 (t,  $J = 7.3$  Hz, 2H), 7.51 (dd,  $J = 9.8, 4.9$  Hz, 4H);  $^1\text{H}$  NMR (600 MHz,  $\text{CDCl}_3$ )  $\delta$  10.27 (s, 1H), 9.75 (s, 1H), 8.64 (s, 1H), 8.37 – 8.23 (m, 2H), 7.97 (dd,  $J = 11.9, 7.8$  Hz, 4H), 7.59 (t,  $J = 7.3$  Hz, 2H), 7.51 (dd,  $J = 9.8, 4.9$  Hz, 4H);  $^{13}\text{C}$  NMR (151 MHz,  $\text{CDCl}_3$ )  $\delta$  190.98, 190.83, 148.51 (d,  $J = 21.5$  Hz), 147.55 (d,  $J = 21.7$  Hz), 145.43, 144.79 (d,  $J = 16.9$  Hz), 142.48 (d,  $J = 2.1$  Hz), 141.84 (d,  $J = 16.9$  Hz), 138.27, 137.53, 135.21, 135.10, 132.60, 132.58, 132.17 (2), 132.15 (2), 132.10 (2), 132.09 (2), 131.46, 131.12, 131.06, 130.42, 130.37, 128.73 (2), 128.65 (2), 127.32;  $^{31}\text{P}$  NMR (243 MHz,  $\text{CDCl}_3$ ):  $\delta$  (ppm) 20.73 or 20.63; HRMS ( $m/z$ ) calcd for  $\text{C}_{21}\text{H}_{16}\text{N}_2\text{O}_2\text{P}[\text{M}+\text{H}]^+$  359.0944, found 359.0948.

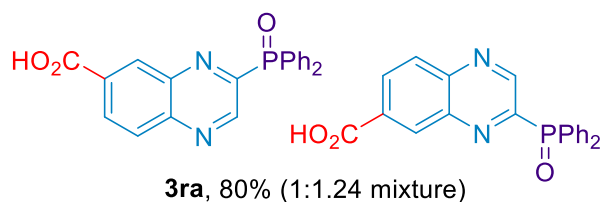

**2 or 3-(diphenylphosphoryl)quinoxaline-6-carboxylic acid (3ra).** Yield, 80%;  $^1\text{H}$  NMR (600 MHz,  $\text{CDCl}_3$ )  $\delta$  9.77 (s, 1H), 8.94 (d,  $J = 1.7$  Hz, 1H), 8.48 (dd,  $J = 8.8, 1.8$  Hz, 1H), 8.26 (d,  $J = 8.8$  Hz, 1H), 8.03 – 7.95 (m, 4H), 7.58 (dd,  $J = 10.4, 4.4$  Hz, 2H), 7.51 (td,  $J = 7.6, 3.1$  Hz, 4H) or  $^1\text{H}$  NMR (600 MHz,  $\text{CDCl}_3$ )  $\delta$  9.75 (s, 1H), 8.95 (d,  $J = 1.7$  Hz, 1H), 8.44 (dd,  $J = 8.8, 1.8$  Hz, 1H), 8.22 (d,  $J = 8.8$  Hz, 1H), 8.04 – 7.94 (m, 4H), 7.58 (dd,  $J = 10.4, 4.4$  Hz, 2H), 7.51 (td,  $J = 7.6, 3.1$  Hz, 4H);  $^{13}\text{C}$  NMR (151 MHz,  $\text{CDCl}_3$ )  $\delta$  171.21, 168.31, 154.33 (d,  $J = 122.4$  Hz), 153.52 (d,  $J = 123.2$  Hz), 147.95 (d,  $J = 21.5$  Hz), 147.22 (d,  $J = 22.0$  Hz), 144.45, 144.03 (d,  $J = 17.3$  Hz), 141.89, 141.41 (d,  $J = 17.3$  Hz), 133.46, 132.86, 132.62, 132.21, 132.17, 132.15, 132.11, 131.97, 131.69, 131.20 (d,  $J = 10.9$  Hz), 130.89 (d,

$J = 9.0$  Hz), 130.49, 130.47, 130.18 (d,  $J = 8.9$  Hz), 129.94, 128.74, 128.66;  $^{31}\text{P}$  NMR (243 MHz,  $\text{CDCl}_3$ ):  $\delta$  (ppm) 21.44 or 21.07; HRMS ( $m/z$ ) calcd for  $\text{C}_{21}\text{H}_{16}\text{N}_2\text{O}_3\text{P}[\text{M}+\text{H}]^+$  375.0893, found 375.0890.

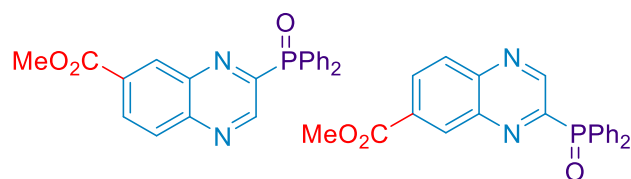

**3sa**, 80% (1:7.6 mixture)

**methyl 2 or 3-(diphenylphosphoryl)quinoxaline-6-carboxylate (3sa)**. Yield, 80%;  $^1\text{H}$  NMR (600 MHz,  $\text{CDCl}_3$ )  $\delta$  9.70 (s, 1H), 8.87 (d,  $J = 1.6$  Hz, 1H), 8.40 (dd,  $J = 8.8, 1.7$  Hz, 1H), 8.20 (d,  $J = 8.8$  Hz, 1H), 7.97 (dt,  $J = 11.1, 7.0$  Hz, 4H), 7.57 (dd,  $J = 10.7, 4.1$  Hz, 2H), 7.50 (td,  $J = 7.6, 3.0$  Hz, 4H), 4.03 (s, 3H);  $^{13}\text{C}$  NMR (151 MHz,  $\text{CDCl}_3$ )  $\delta$  165.82, 154.50 (d,  $J = 121.6$  Hz), 147.22 (d,  $J = 21.8$  Hz), 143.85 (d,  $J = 17.0$  Hz), 141.94, 133.00, 132.49, 132.48, 132.19, 132.16, 132.10, 131.28, 130.58, 130.44, 130.17, 128.68, 128.60, 52.84;  $^{31}\text{P}$  NMR (243 MHz,  $\text{CDCl}_3$ ):  $\delta$  (ppm) 20.54 or 20.24; HRMS ( $m/z$ ) calcd for  $\text{C}_{22}\text{H}_{18}\text{N}_2\text{O}_3\text{P}[\text{M}+\text{H}]^+$  389.1050, found 389.1055.

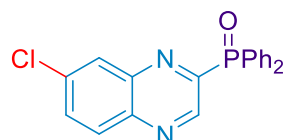

**3ta-1**

**(7-chloroquinoxalin-2-yl)diphenylphosphine oxide (3ta-1)**. Yield, 98%;  $^1\text{H}$  NMR (600 MHz,  $\text{CDCl}_3$ )  $\delta$  9.61 (s, 1H), 8.18 (d,  $J = 2.2$  Hz, 1H), 8.09 (d,  $J = 9.0$  Hz, 1H), 7.95 – 7.90 (m, 4H), 7.77 (dd,  $J = 9.0, 2.2$  Hz, 2H), 7.60 – 7.56 (m, 2H), 7.50 (td,  $J = 7.6, 3.0$  Hz, 4H);  $^{13}\text{C}$  NMR (151 MHz,  $\text{CDCl}_3$ )  $\delta$  152.26 (d,  $J = 123.9$  Hz), 147.18 (d,  $J = 22.0$  Hz), 142.86, 140.71 (d,  $J = 16.8$  Hz), 138.20, 132.55, 132.53, 132.15 (2), 132.08 (2), 132.03, 131.37, 131.24, 131.14 (d,  $J = 8.5$  Hz), 130.41, 128.70 (2), 128.62 (2);  $^{31}\text{P}$  NMR (243 MHz,  $\text{CDCl}_3$ ):  $\delta$  (ppm) 21.42. HRMS ( $m/z$ ) calcd for  $\text{C}_{20}\text{H}_{15}\text{ClN}_2\text{OP}[\text{M}+\text{H}]^+$  365.0605, found 365.0609.

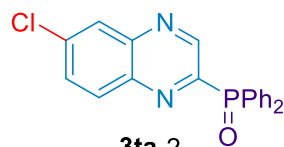

**3ta-2**

**(6-chloroquinoxalin-2-yl)diphenylphosphine oxide (3ta-2)**. Yield, 98%;  $^1\text{H}$  NMR (600 MHz,  $\text{CDCl}_3$ )  $\delta$  9.63 (s, 1H), 8.17 (d,  $J = 2.3$  Hz, 1H), 8.13 (d,  $J = 9.0$  Hz, 1H), 7.98 – 7.90 (m, 4H), 7.80 (dd,  $J = 9.0, 2.3$  Hz, 1H), 7.57 (td,  $J = 7.4, 1.3$  Hz, 2H), 7.52 – 7.46 (m, 4H);  $^{13}\text{C}$  NMR (151 MHz,  $\text{CDCl}_3$ )  $\delta$  153.51 (d,  $J = 122.5$  Hz), 146.43 (d,  $J = 21.8$  Hz), 142.34 (d,  $J = 17.3$  Hz), 141.05, 136.83, 133.04, 132.45, 132.43, 132.12 (2), 132.06 (2), 131.38, 130.82 (d,  $J = 1.8$  Hz), 130.68, 128.90, 128.65 (2), 128.57 (2);  $^{31}\text{P}$  NMR (243 MHz,  $\text{CDCl}_3$ ):  $\delta$  (ppm) 20.48. HRMS ( $m/z$ ) calcd for  $\text{C}_{20}\text{H}_{15}\text{ClN}_2\text{OP}[\text{M}+\text{H}]^+$



365.0605, found 365.0608.

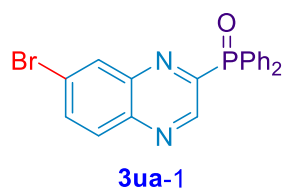

**(7-bromoquinoxalin-2-yl)diphenylphosphine oxide (3ua-1).** Yield, 98%;  $^1\text{H}$  NMR (600 MHz,  $\text{CDCl}_3$ )  $\delta$  9.61 (s, 1H), 8.37 (d,  $J = 2.1$  Hz, 1H), 8.02 (d,  $J = 9.0$  Hz, 1H), 7.97 – 7.87 (m, 5H), 7.57 (td,  $J = 7.4$ , 1.2 Hz, 2H), 7.49 (td,  $J = 7.6$ , 3.1 Hz, 4H);  $^{13}\text{C}$  NMR (151 MHz,  $\text{CDCl}_3$ )  $\delta$  152.73 (d,  $J = 123.1$  Hz), 147.18 (d,  $J = 21.9$  Hz), 143.06, 140.93 (d,  $J = 17.1$  Hz), 134.49, 132.43, 132.41, 132.14 (2), 132.08 (2), 131.91 (d,  $J = 1.6$  Hz), 131.38, 131.10 (d,  $J = 105.3$  Hz), 128.65 (2), 128.56 (2), 126.45;  $^{31}\text{P}$  NMR (243 MHz,  $\text{CDCl}_3$ ):  $\delta$  (ppm) 20.60. HRMS (m/z) calcd for  $\text{C}_{20}\text{H}_{15}\text{BrN}_2\text{OP}[\text{M}+\text{H}]^+$  409.0100, found 409.0109.

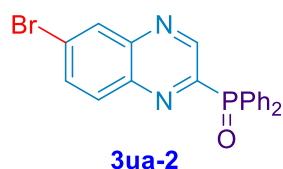

**(6-bromoquinoxalin-2-yl)diphenylphosphine oxide (3ua-2).** Yield, 98%;  $^1\text{H}$  NMR (600 MHz,  $\text{CDCl}_3$ )  $\delta$  9.65 (s, 1H), 8.35 (d,  $J = 2.0$  Hz, 1H), 8.05 (d,  $J = 9.0$  Hz, 1H), 7.94 (ddd,  $J = 9.0$ , 5.6, 4.5 Hz, 4H), 7.57 (td,  $J = 7.4$ , 1.2 Hz, 2H), 7.52 – 7.44 (m, 4H);  $^{13}\text{C}$  NMR (151 MHz,  $\text{CDCl}_3$ )  $\delta$  153.45 (d,  $J = 122.4$  Hz), 146.61 (d,  $J = 21.7$  Hz), 142.56 (d,  $J = 17.3$  Hz), 141.36, 135.50, 132.44, 132.42, 132.31, 132.12 (2), 132.05 (2), 131.06 (d,  $J = 105.2$  Hz), 130.90, 128.64 (2), 128.56 (2), 125.00;  $^{31}\text{P}$  NMR (243 MHz,  $\text{CDCl}_3$ ):  $\delta$  (ppm) 20.41. HRMS (m/z) calcd for  $\text{C}_{20}\text{H}_{15}\text{BrN}_2\text{OP}[\text{M}+\text{H}]^+$  409.0100, found 409.0105.

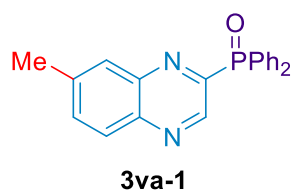

**(7-methylquinoxalin-2-yl)diphenylphosphine oxide (3va-1).** Yield, 95%;  $^1\text{H}$  NMR (600 MHz,  $\text{CDCl}_3$ )  $\delta$  9.57 (s, 1H), 8.04 (d,  $J = 8.6$  Hz, 1H), 7.95 (m, 5H), 7.66 (d,  $J = 7.5$  Hz, 1H), 7.55 (t,  $J = 7.3$  Hz, 2H), 7.48 (t,  $J = 7.1$  Hz, 4H), 2.63 (s, 3H);  $^{13}\text{C}$  NMR (151 MHz,  $\text{CDCl}_3$ )  $\delta$  161.07 (d,  $J = 318.0$  Hz), 146.40 (d,  $J = 22.4$  Hz), 143.08, 142.88 (d,  $J = 62.2$  Hz), 133.17, 132.22 (2), 132.16 (2), 132.10 (2), 129.72, 128.55 (2), 128.47 (2), 128.26, 29.70;  $^{31}\text{P}$  NMR (243 MHz,  $\text{CDCl}_3$ ):  $\delta$  (ppm) 19.00; HRMS (m/z) calcd for  $\text{C}_{21}\text{H}_{18}\text{N}_2\text{OP}[\text{M}+\text{H}]^+$  345.1151, found 345.1155.

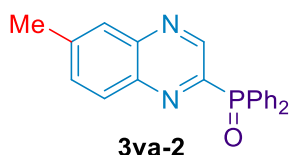

**(6-methylquinoxalin-2-yl)diphenylphosphine oxide (3va-2).** Yield, 95%;  $^1\text{H}$  NMR (600 MHz,  $\text{CDCl}_3$ )  $\delta$  9.55 (s, 1H), 8.11 (d,  $J = 8.6$  Hz, 1H), 8.00 – 7.89 (m, 5H), 7.72 (d,  $J = 8.6$  Hz, 1H), 7.56 (dd,  $J = 10.6, 4.3$  Hz, 2H), 7.48 (td,  $J = 8.0, 2.9$  Hz, 4H), 2.61 (s, 3H);  $^{13}\text{C}$  NMR (151 MHz,  $\text{CDCl}_3$ )  $\delta$  152.22 (d,  $J = 124.8$  Hz), 144.81 (d,  $J = 22.4$  Hz), 142.52 (d,  $J = 17.1$  Hz), 141.86, 140.29, 134.76, 132.29, 132.27, 132.12 (2), 132.06 (2), 131.34 (d,  $J = 105.0$  Hz), 128.86, 128.56 (3), 128.48 (2), 116.35, 21.84;  $^{31}\text{P}$  NMR (243 MHz,  $\text{CDCl}_3$ ):  $\delta$  (ppm) 18.80; HRMS ( $m/z$ ) calcd for  $\text{C}_{21}\text{H}_{18}\text{N}_2\text{OP}[\text{M}+\text{H}]^+$  345.1151, found 345.1150.

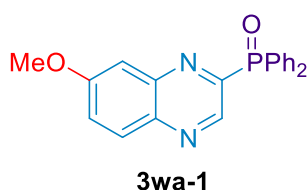

**(7-methoxyquinoxalin-2-yl)diphenylphosphine oxide (3wa-1).** Yield, 98%;  $^1\text{H}$  NMR (600 MHz,  $\text{CDCl}_3$ )  $\delta$  9.44 (s, 1H), 8.03 (d,  $J = 9.2$  Hz, 1H), 7.93 (dd,  $J = 11.8, 7.9$  Hz, 4H), 7.55 (t,  $J = 7.3$  Hz, 2H), 7.48 (t,  $J = 5.9$  Hz, 5H), 7.37 (s, 1H), 3.96 (s, 3H);  $^{13}\text{C}$  NMR (151 MHz,  $\text{CDCl}_3$ )  $\delta$  161.32, 151.70 (d,  $J = 125.1$  Hz), 144.02 (d,  $J = 17.9$  Hz), 143.88 (d,  $J = 22.7$  Hz), 138.95 (d,  $J = 2.1$  Hz), 132.25, 132.23, 132.13 (2), 132.07 (2), 131.38 (d,  $J = 104.8$  Hz), 130.34 (d,  $J = 1.8$  Hz), 128.55 (2), 128.46 (2), 125.92, 106.80, 55.94;  $^{31}\text{P}$  NMR (243 MHz,  $\text{CDCl}_3$ ):  $\delta$  (ppm) 19.40; HRMS ( $m/z$ ) calcd for  $\text{C}_{21}\text{H}_{18}\text{N}_2\text{O}_2\text{P}[\text{M}+\text{H}]^+$  361.1100, found 361.1105.

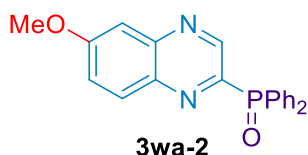

**(6-methoxyquinoxalin-2-yl)diphenylphosphine oxide (3wa-2).** Yield, 98%;  $^1\text{H}$  NMR (600 MHz,  $\text{CDCl}_3$ )  $\delta$  9.52 (s, 1H), 8.03 (d,  $J = 8.9$  Hz, 1H), 7.98 – 7.90 (m, 4H), 7.55 (t,  $J = 7.2$  Hz, 2H), 7.51 – 7.45 (m, 6H), 4.00 (s, 3H);  $^{13}\text{C}$  NMR (151 MHz,  $\text{CDCl}_3$ )  $\delta$  162.68, 146.08 (d,  $J = 23.1$  Hz), 144.03, 132.23 (2), 132.17 (2), 132.11 (2), 131.29, 128.57 (2), 128.49 (2), 124.91, 105.98, 56.18;  $^{31}\text{P}$  NMR (243 MHz,  $\text{CDCl}_3$ ):  $\delta$  (ppm) 19.17; HRMS ( $m/z$ ) calcd for  $\text{C}_{21}\text{H}_{18}\text{N}_2\text{O}_2\text{P}[\text{M}+\text{H}]^+$  361.1100, found 361.1102.

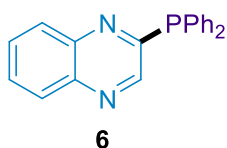

**2-(diphenylphosphaneyl)quinoxaline (6).**  $^1\text{H}$  NMR (600 MHz,  $\text{CDCl}_3$ )  $\delta$  9.64 (s, 1H), 8.25 (dd,  $J = 8.3, 0.9$  Hz, 1H), 8.19 (dd,  $J = 8.3, 0.8$  Hz, 1H), 8.00 – 7.93 (m, 4H), 7.93 – 7.88 (m, 1H), 7.88 – 7.83

(m, 1H), 7.57 (td,  $J = 7.4, 1.2$  Hz, 2H), 7.49 (td,  $J = 7.6, 3.1$  Hz, 4H).  $^{13}\text{C}$  NMR (151 MHz,  $\text{CDCl}_3$ )  $\delta$  152.63 (d,  $J = 124.0$  Hz), 145.55 (d,  $J = 22.3$  Hz), 142.49 (d,  $J = 17.0$  Hz), 141.58, 132.40 (2), 132.38, 132.17 (2), 132.10 (2), 131.53, 131.05, 130.83, 130.26, 129.07, 128.63 (2), 128.55 (2).  $^{31}\text{P}$  NMR (243 MHz,  $\text{CDCl}_3$ ):  $\delta$  (ppm) 20.48. HRMS ( $m/z$ ) calcd for  $\text{C}_{20}\text{H}_{16}\text{N}_2\text{P}[\text{M}+\text{H}]^+$  315.1046, found 315.1045.

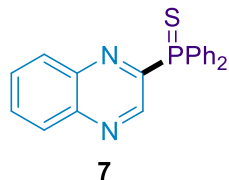

**diphenyl(quinoxalin-2-yl)phosphine sulfide (7).**  $^1\text{H}$  NMR (600 MHz,  $\text{CDCl}_3$ )  $\delta$  9.81 (s, 1H), 8.23 (d,  $J = 7.5$  Hz, 1H), 8.14 – 8.09 (m, 1H), 8.00 – 7.93 (m, 4H), 7.92 – 7.87 (m, 1H), 7.86 – 7.81 (m, 1H), 7.56 – 7.52 (m, 2H), 7.50 – 7.44 (m, 4H);  $^{13}\text{C}$   $^{13}\text{C}$  NMR (151 MHz,  $\text{CDCl}_3$ )  $\delta$  151.84 (d,  $J = 104.7$  Hz), 146.01 (d,  $J = 27.8$  Hz), 141.51 (d,  $J = 16.2$  Hz), 141.07, 132.53 (2), 132.46 (2), 132.36, 131.94, 131.92, 131.69, 131.12, 131.05, 130.23 (d,  $J = 1.3$  Hz), 128.97 (d,  $J = 2.1$  Hz), 128.54 (2), 128.45 (2);  $^{31}\text{P}$  NMR (243 MHz,  $\text{CDCl}_3$ ):  $\delta$  (ppm) 35.74. HRMS ( $m/z$ ) calcd for  $\text{C}_{20}\text{H}_{16}\text{N}_2\text{PS}[\text{M}+\text{H}]^+$  347.0766, found 347.0765.

### 3. NMR spectrum of **3**, **6** and **7**

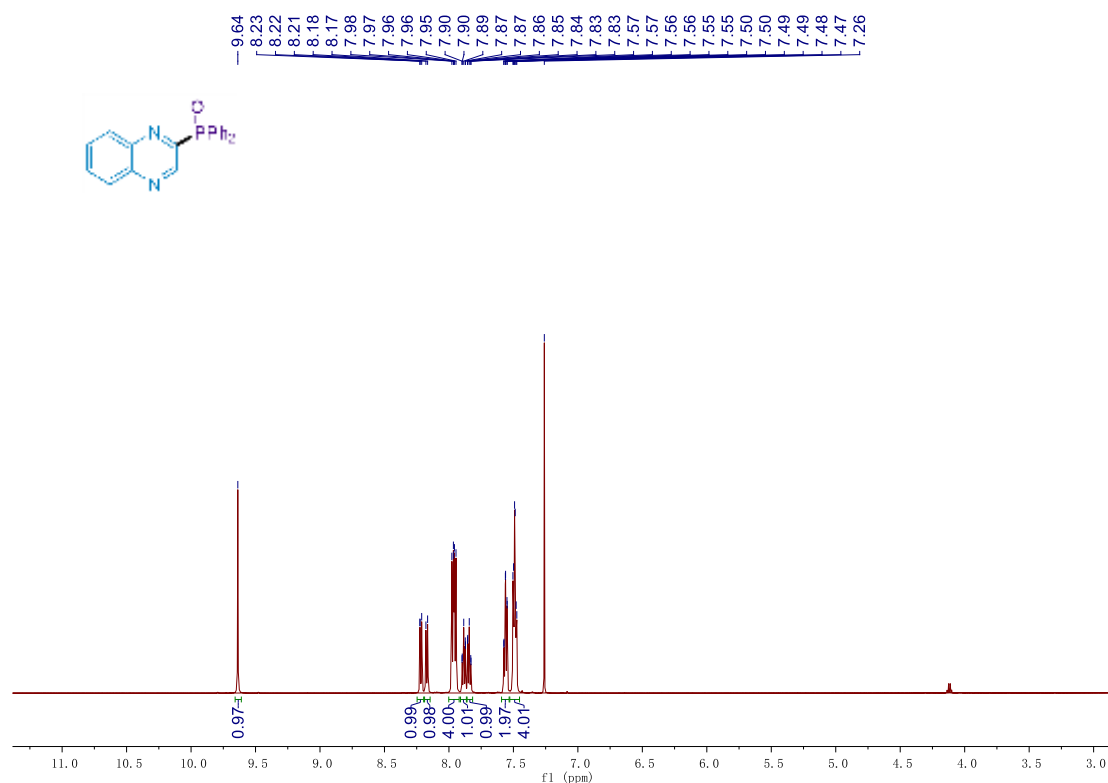

Fig.S 1 <sup>1</sup>H NMR of compound **3aa**

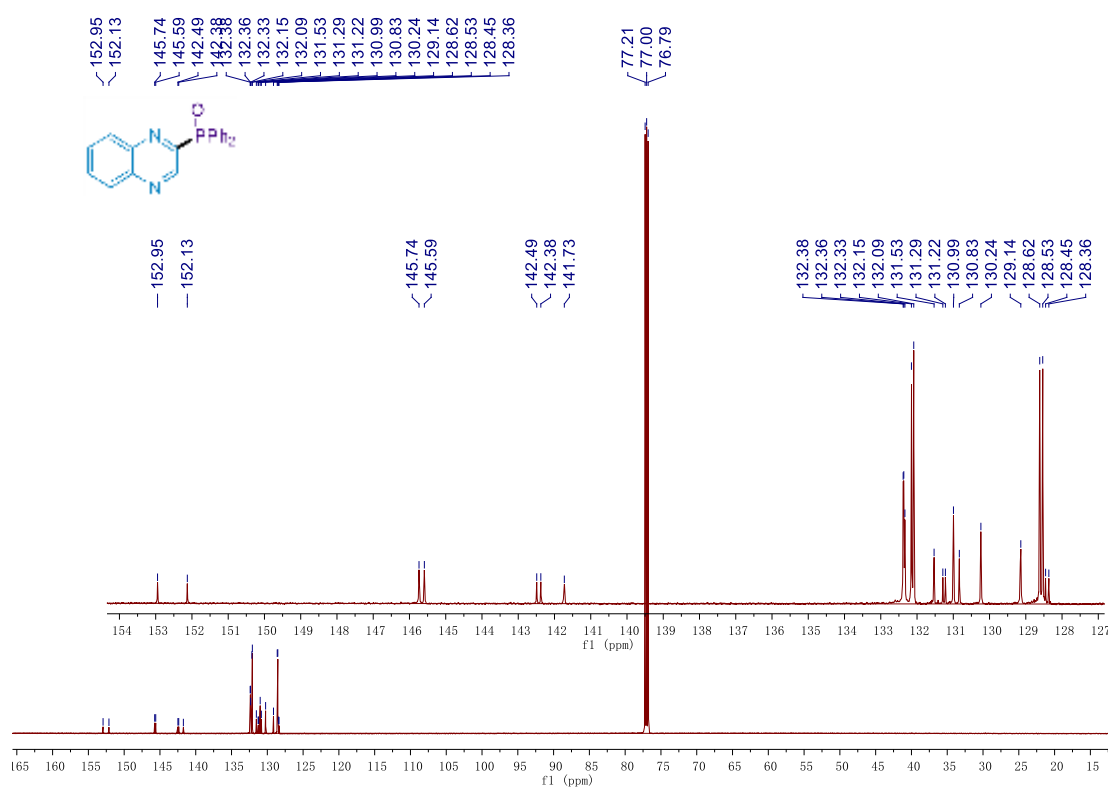

Fig.S 2 <sup>13</sup>C NMR of compound **3aa**

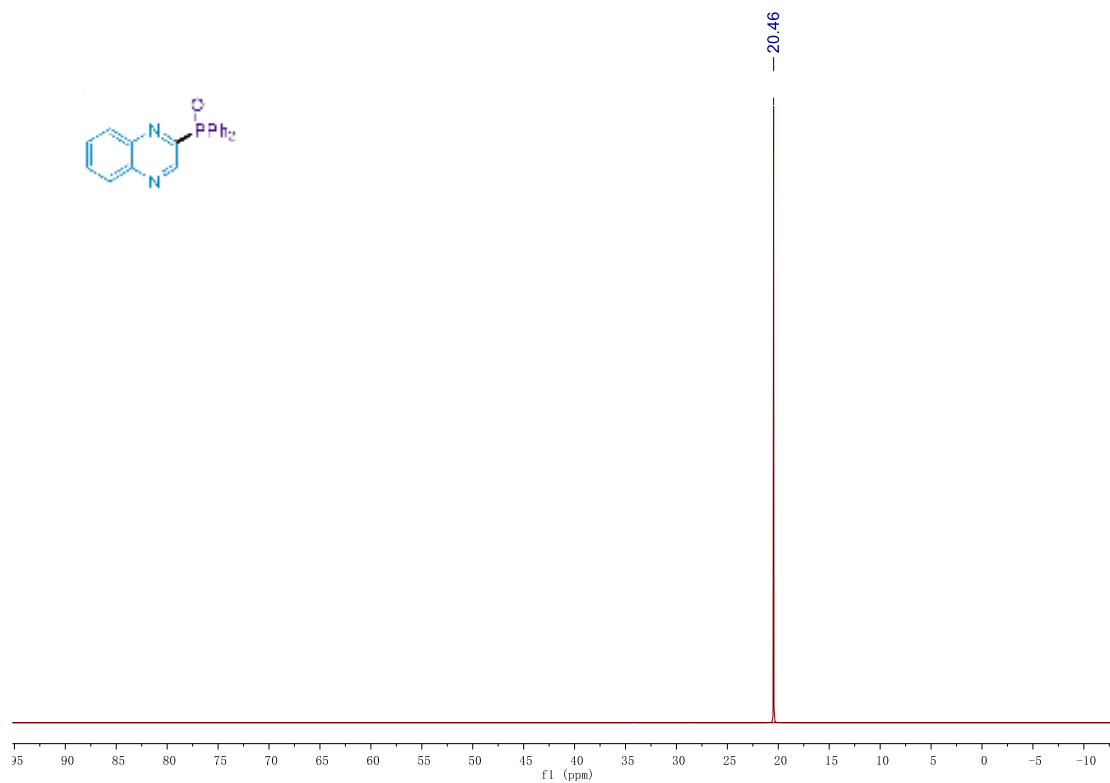

Fig.S 3  $^{31}\text{P}$  NMR of compound 3aa

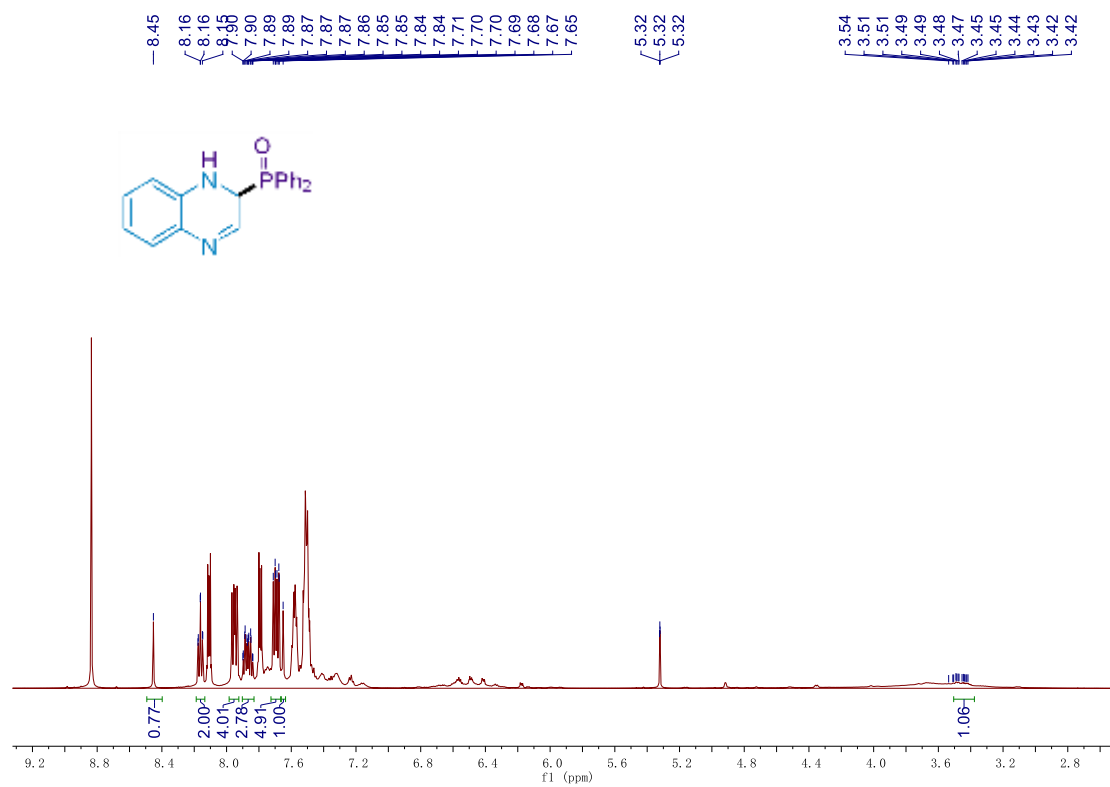

Fig.S 4  $^1\text{H}$  NMR of compound 3aa'

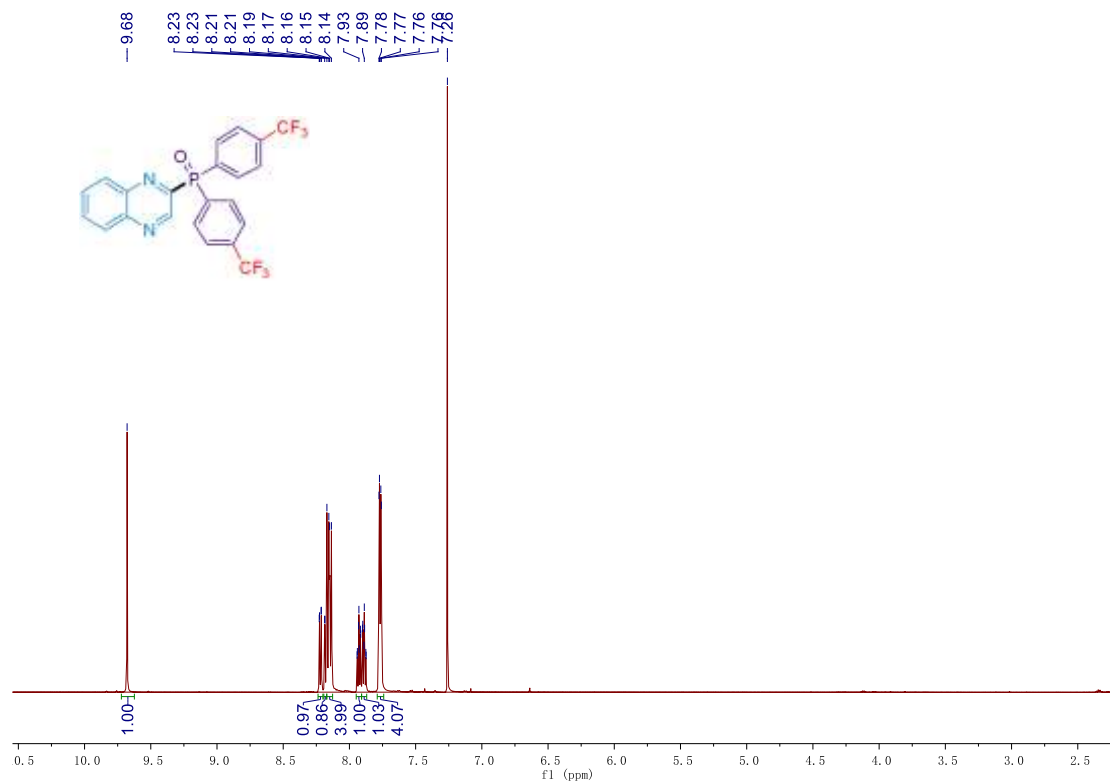

Fig.S 5  $^1\text{H NMR}$  of compound **3ab**

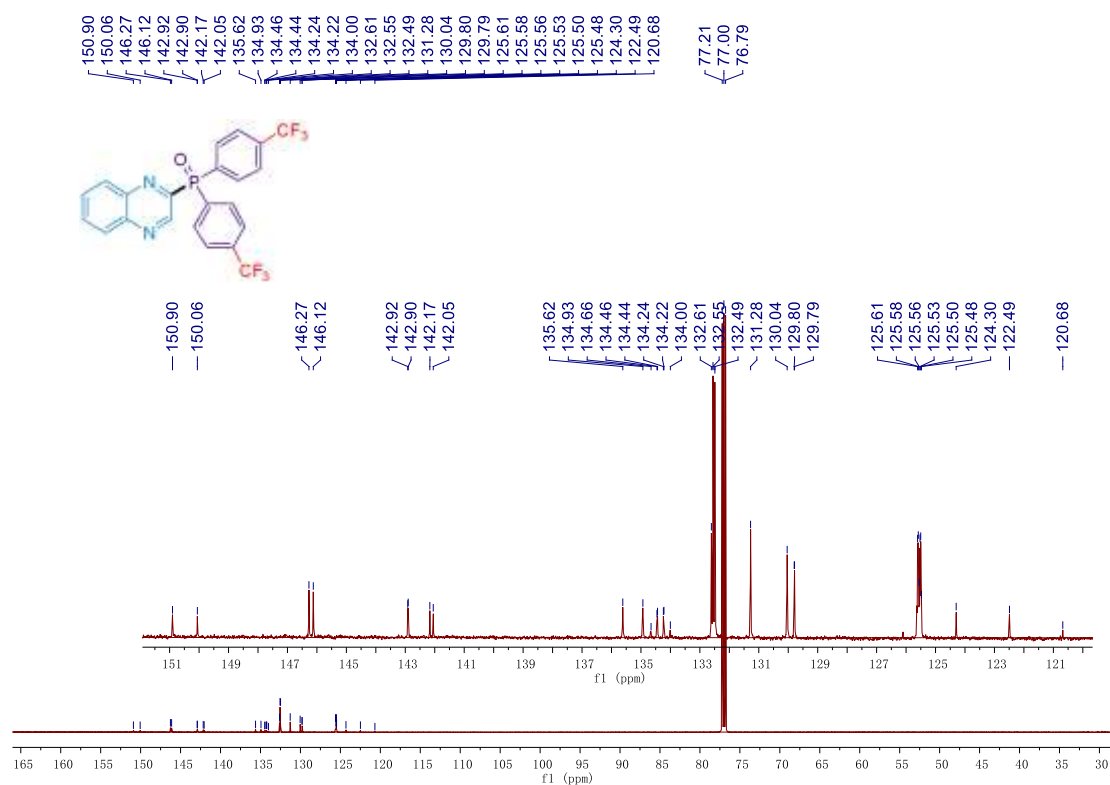

Fig.S 6  $^{13}\text{C NMR}$  of compound **3ab**

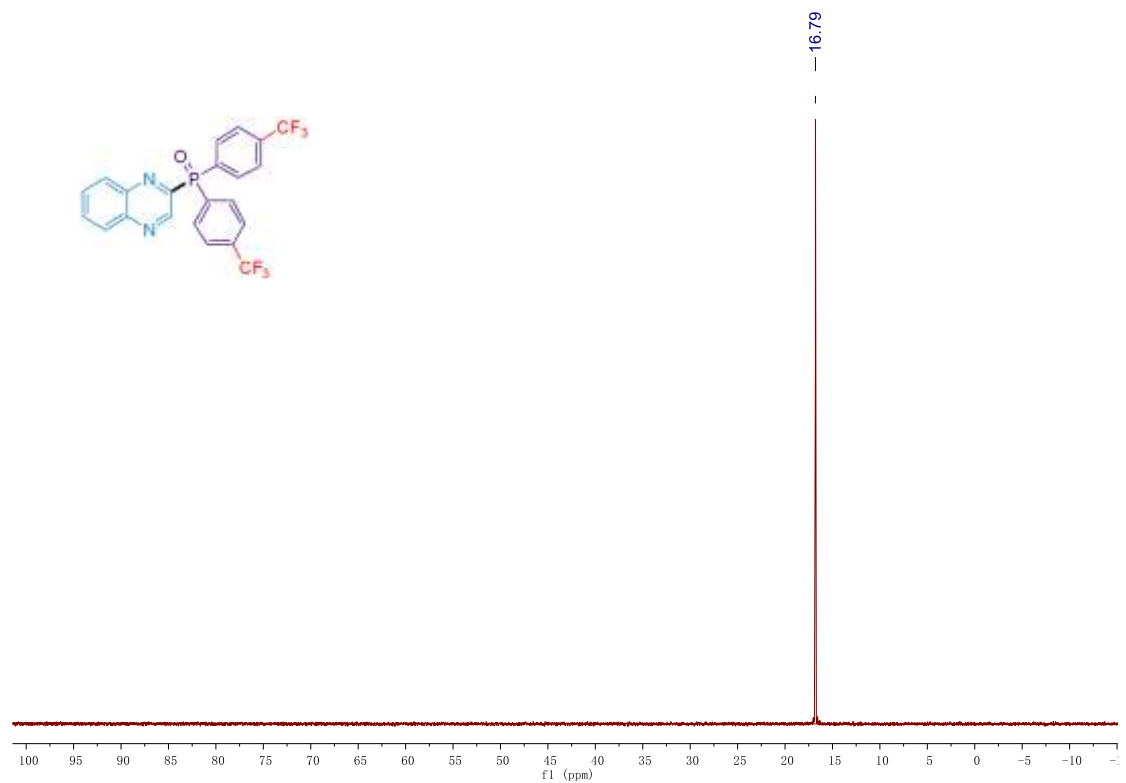

Fig.S 7  $^{31}\text{P}$  NMR of compound 3ab

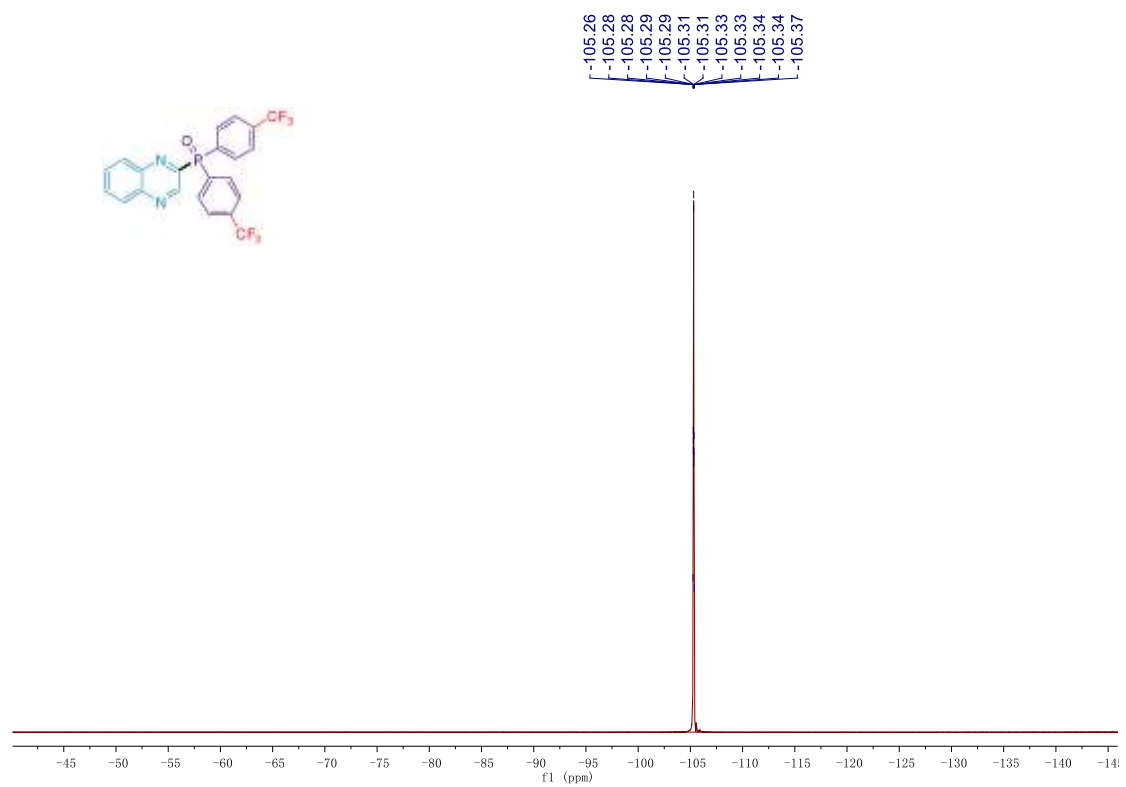

Fig.S 8  $^{19}\text{F}$  NMR of compound 3ab

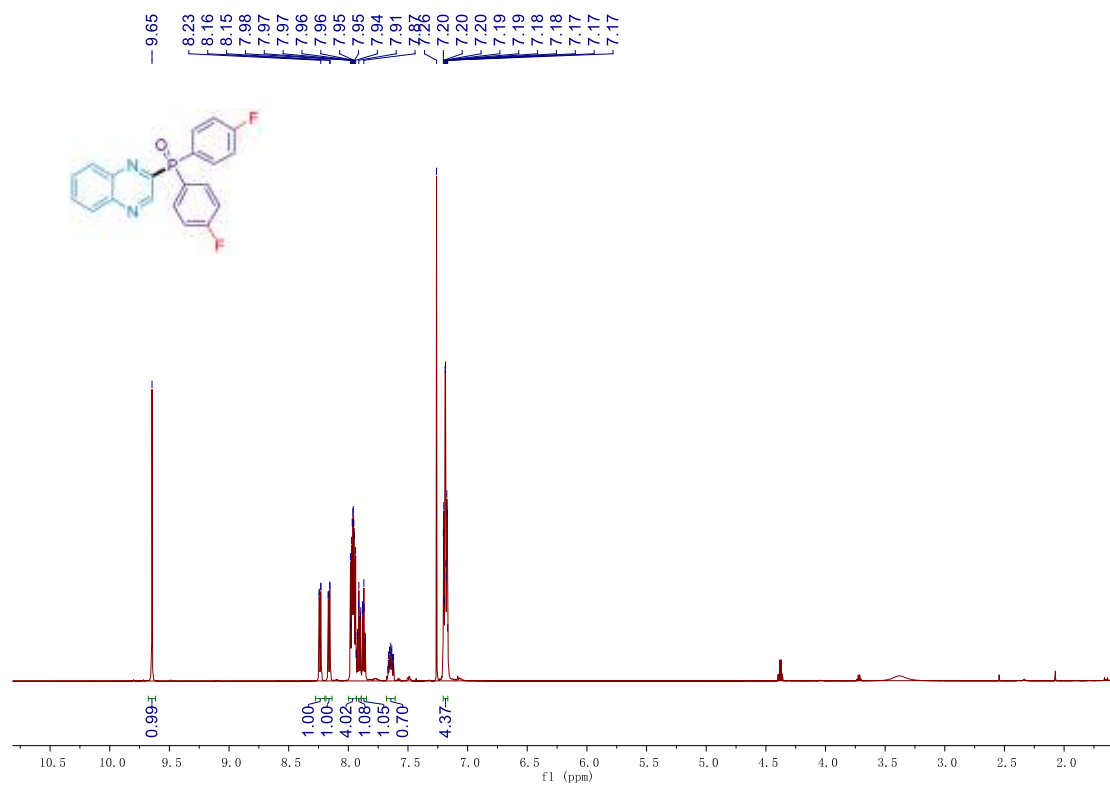

Fig.S 9  $^1\text{H}$  NMR of compound 3ac

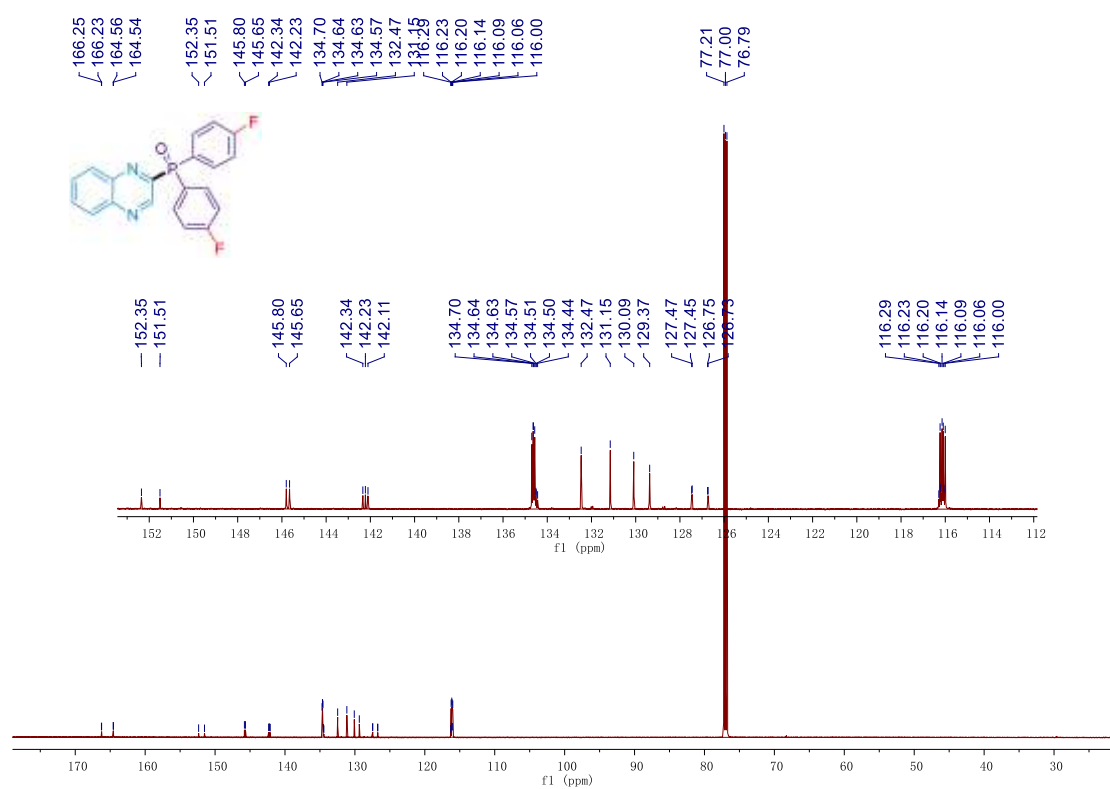

Fig.S 10  $^{13}\text{C}$  NMR of compound 3ac



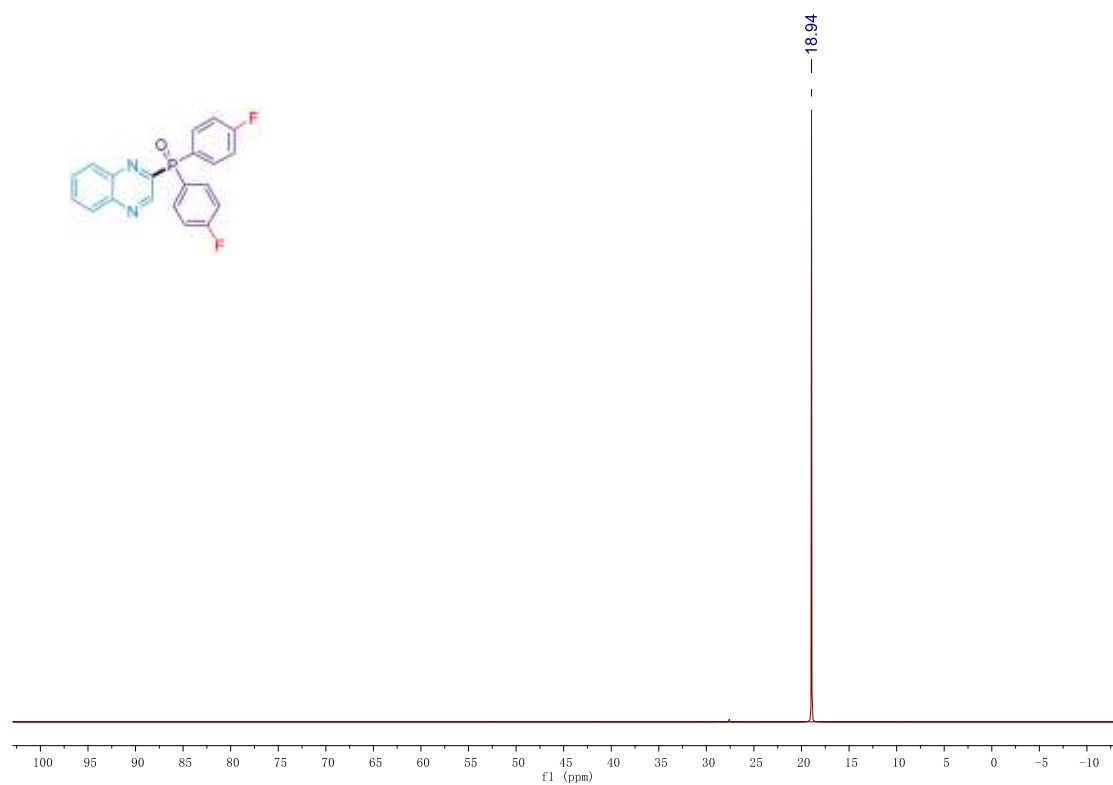

Fig.S 11 <sup>31</sup>P NMR of compound 3ac

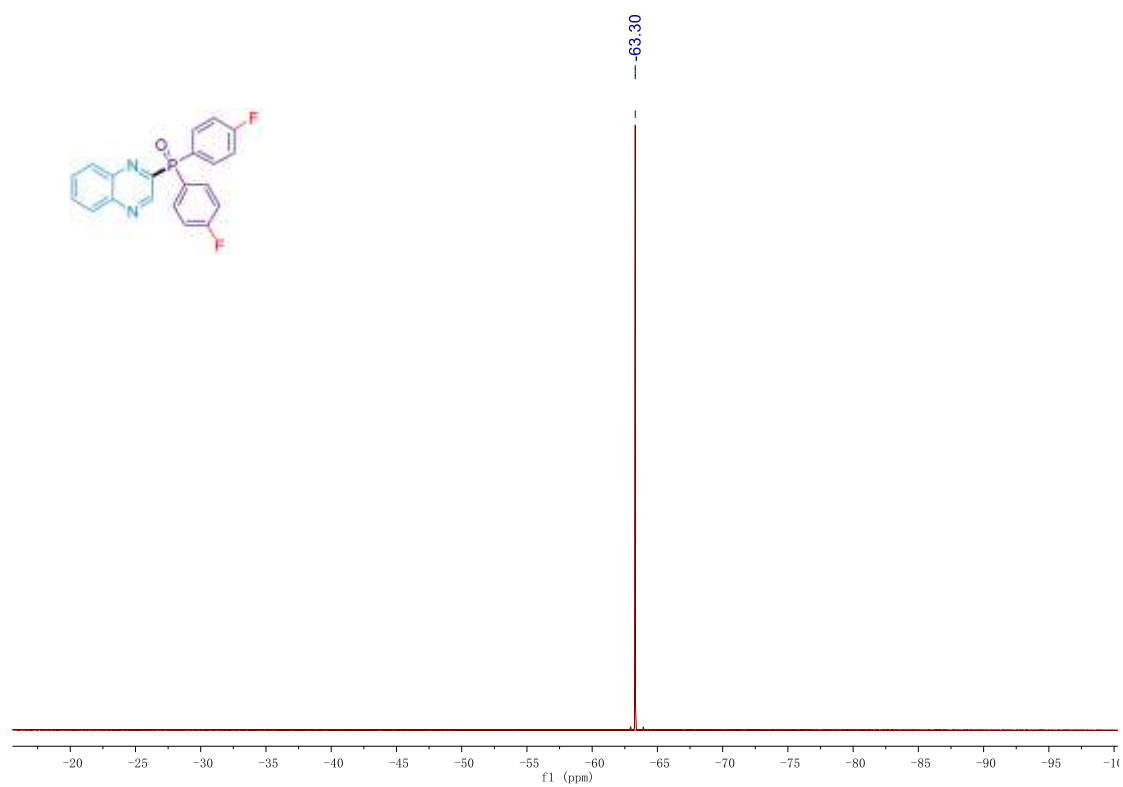

Fig.S 12 <sup>19</sup>F NMR of compound 3ac

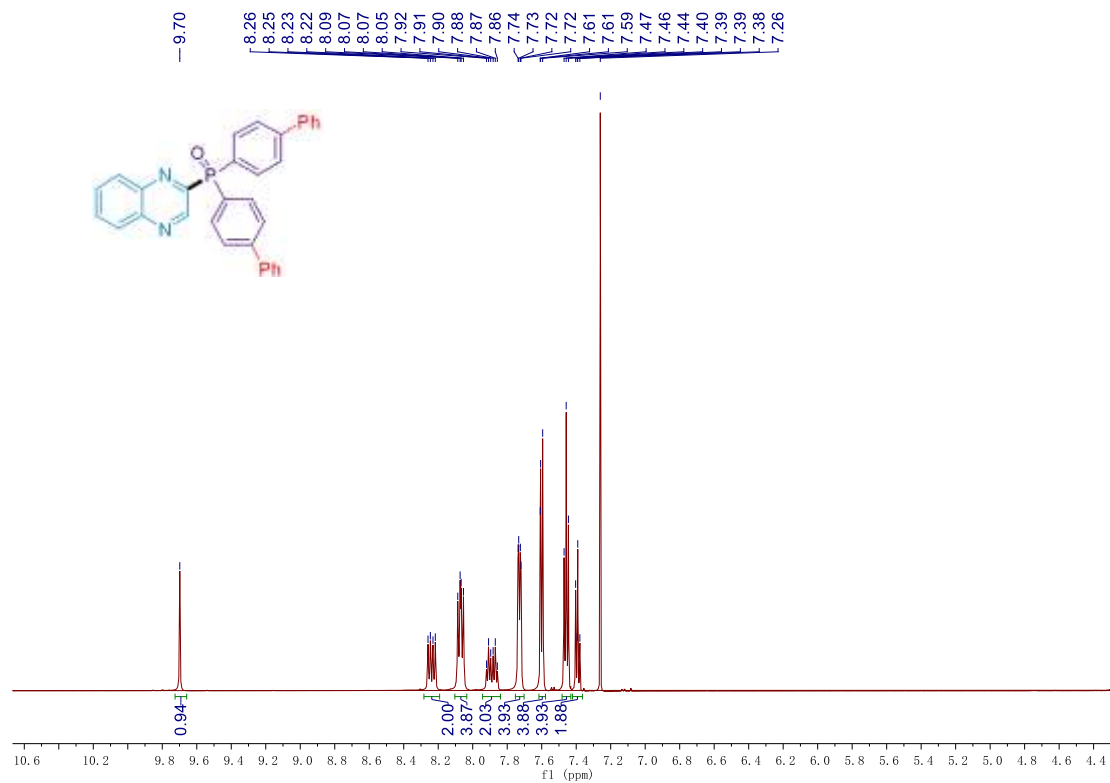

Fig.S 13  $^1\text{H NMR}$  of compound 3ad

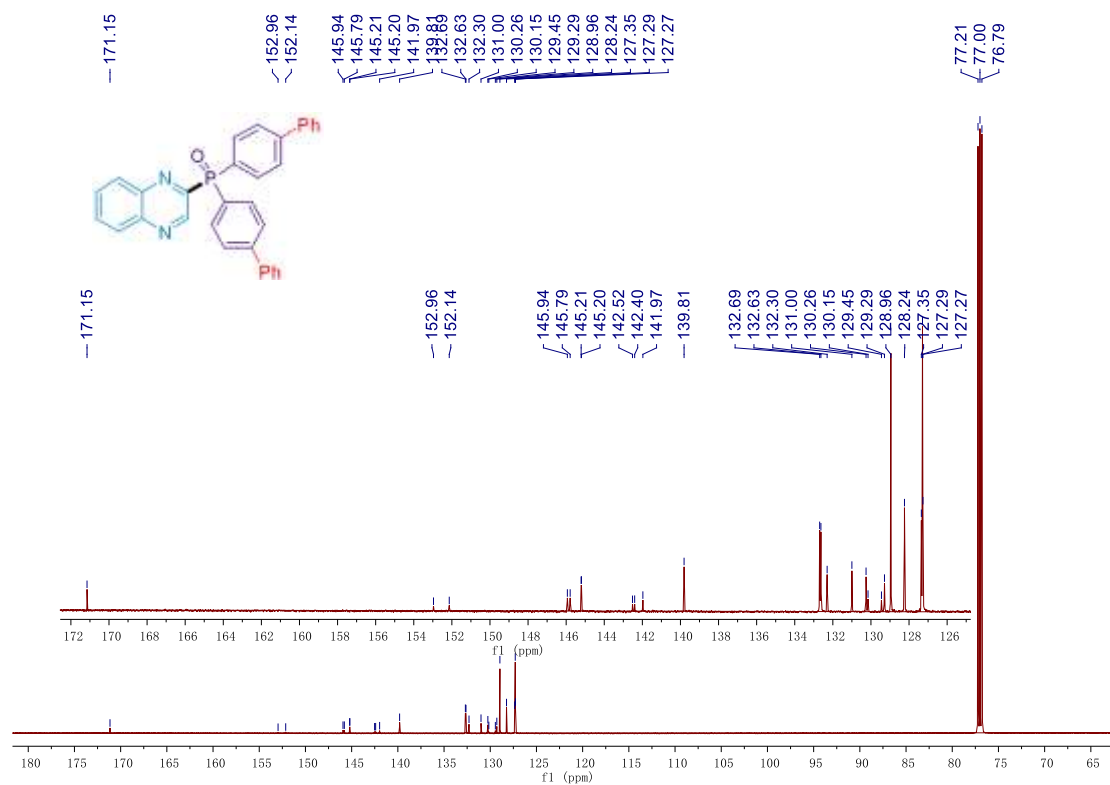

Fig.S 14  $^{13}\text{C NMR}$  of compound 3ad

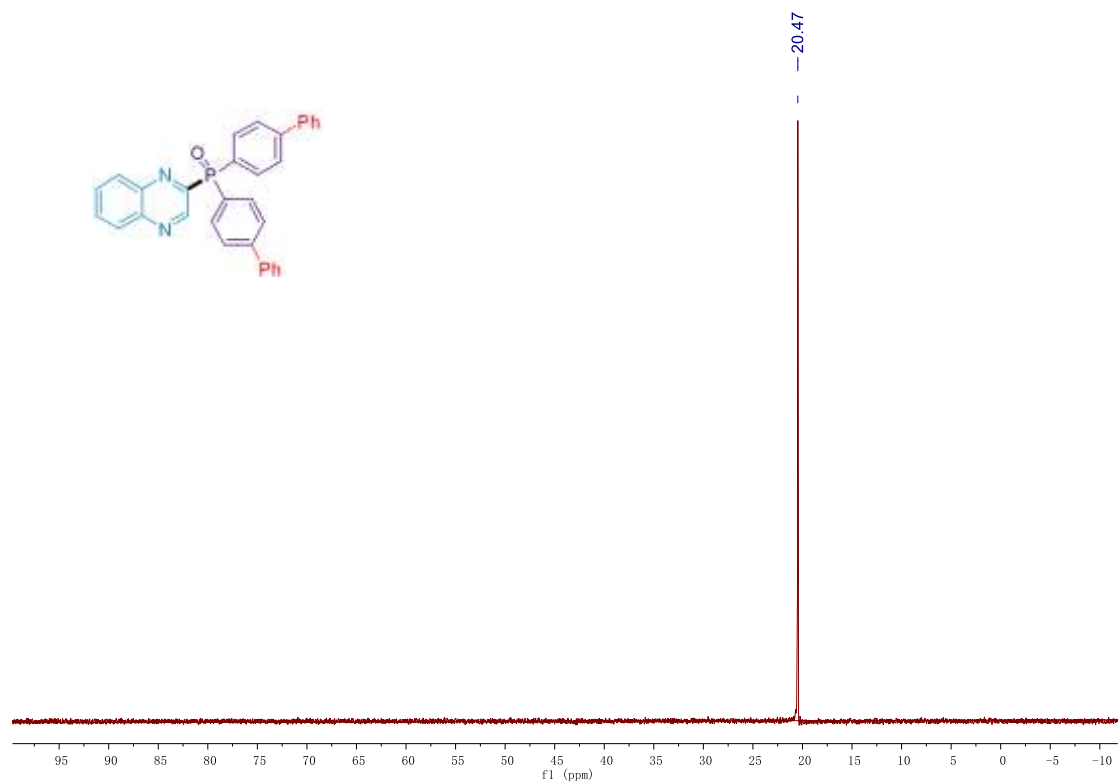

Fig.S 15  $^{31}\text{P}$  NMR of compound 3ad

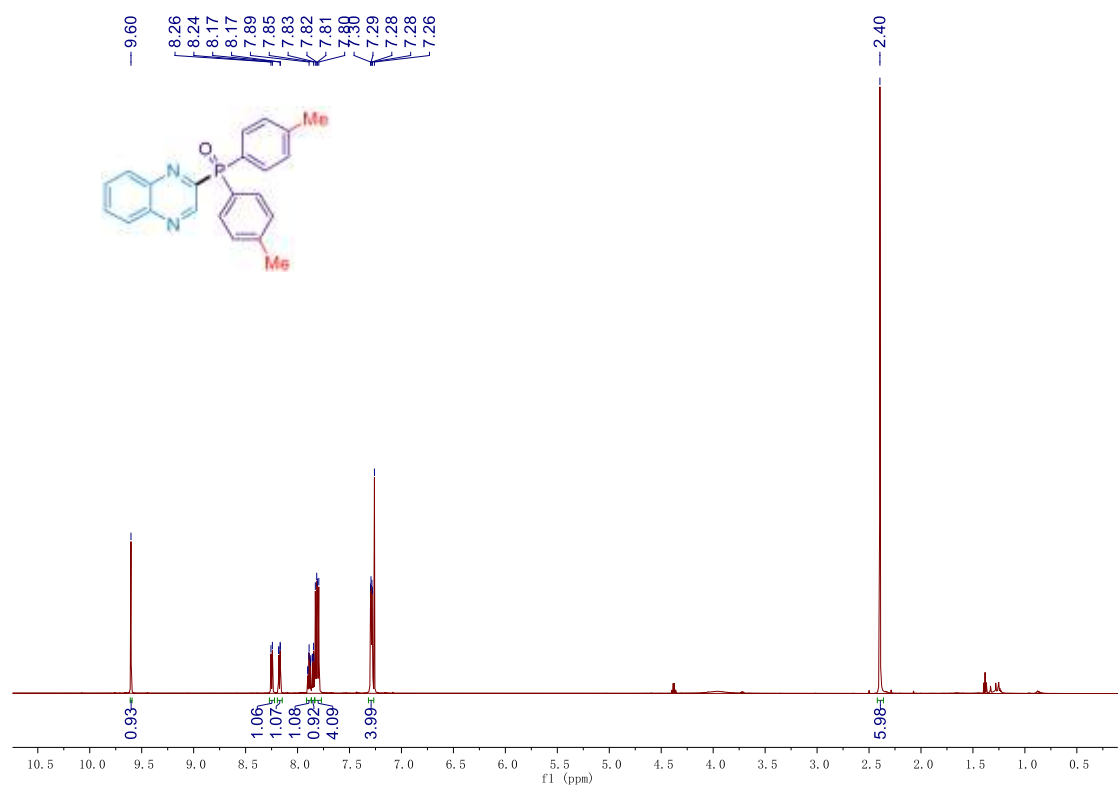

Fig.S 16  $^1\text{H}$  NMR of compound 3ae

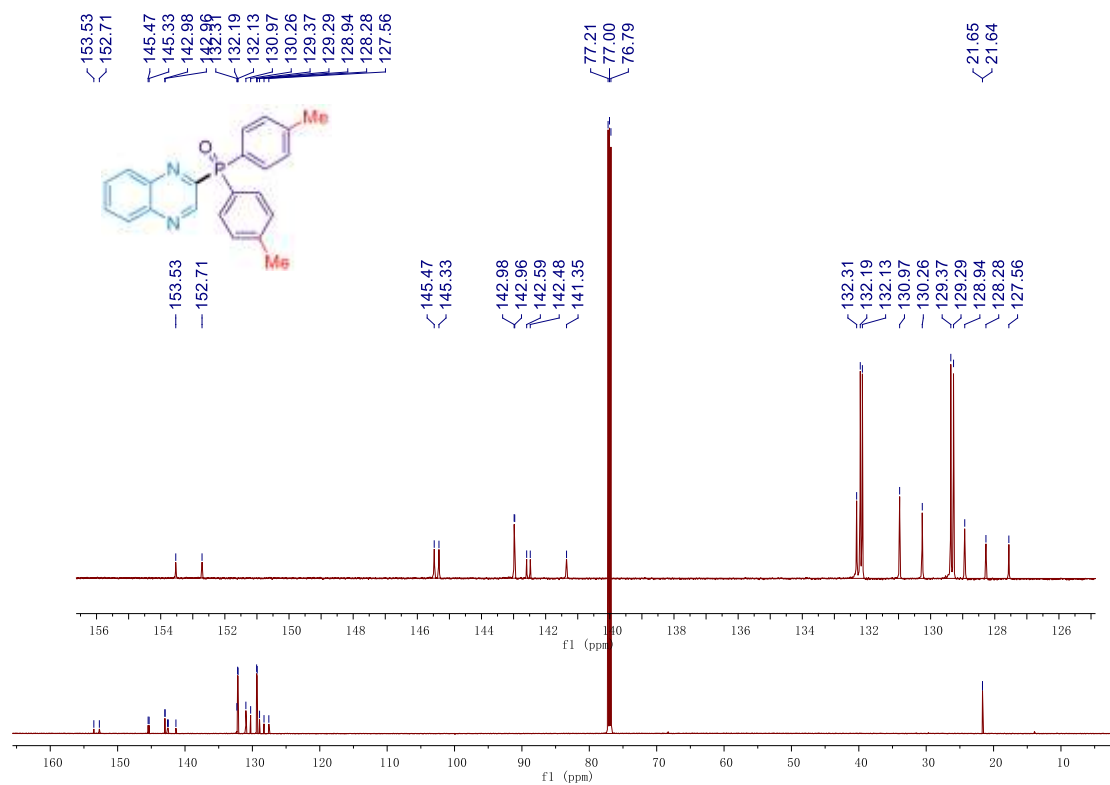

Fig.S 17 <sup>13</sup>C NMR of compound 3ae

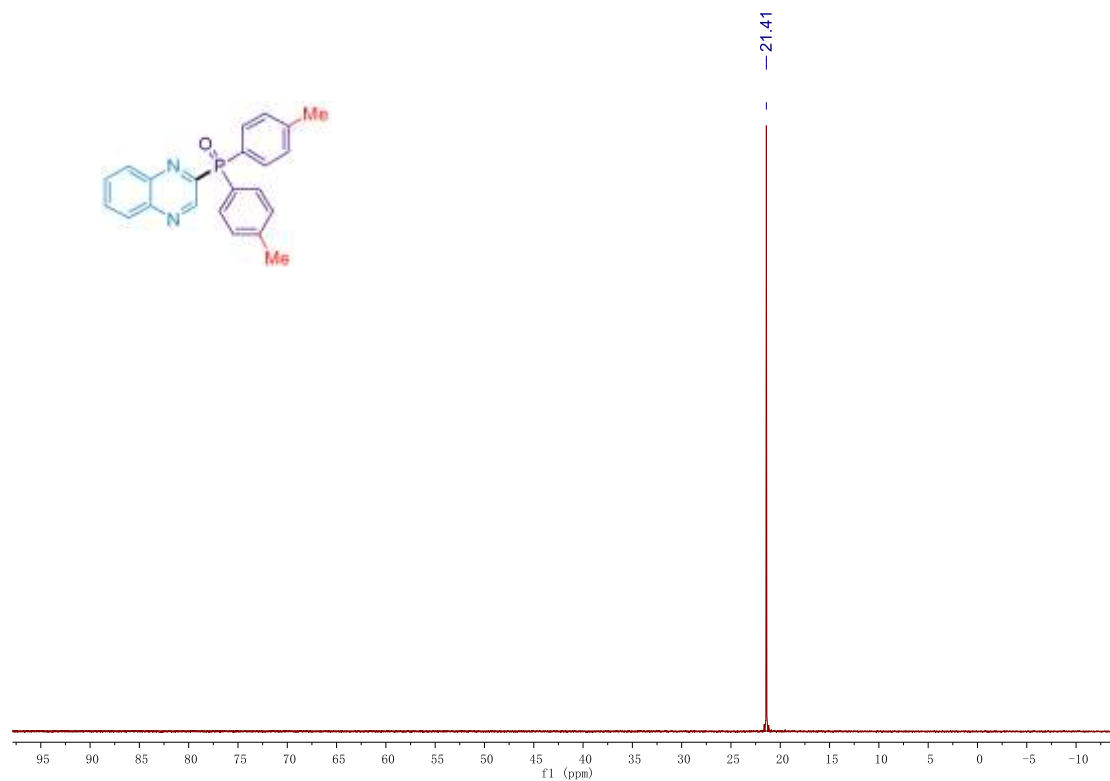

Fig.S 18 <sup>31</sup>P NMR of compound 3ae

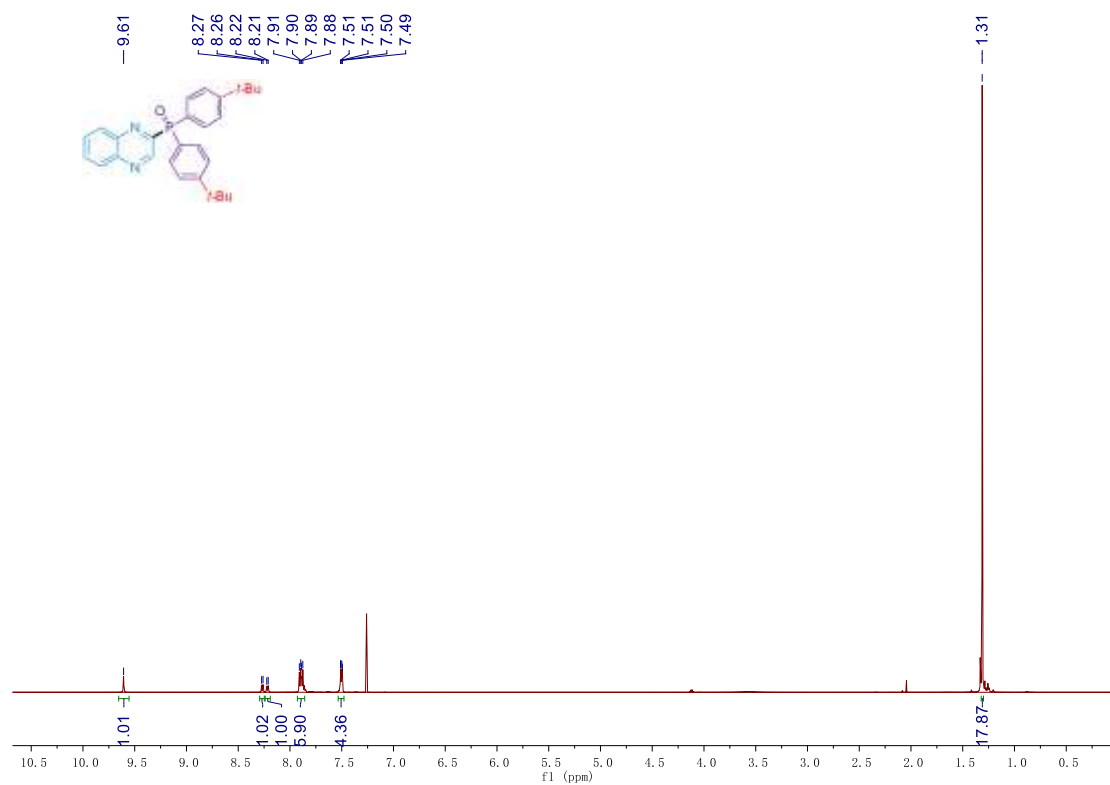

Fig.S 19  $^1\text{H}$  NMR of compound 3af

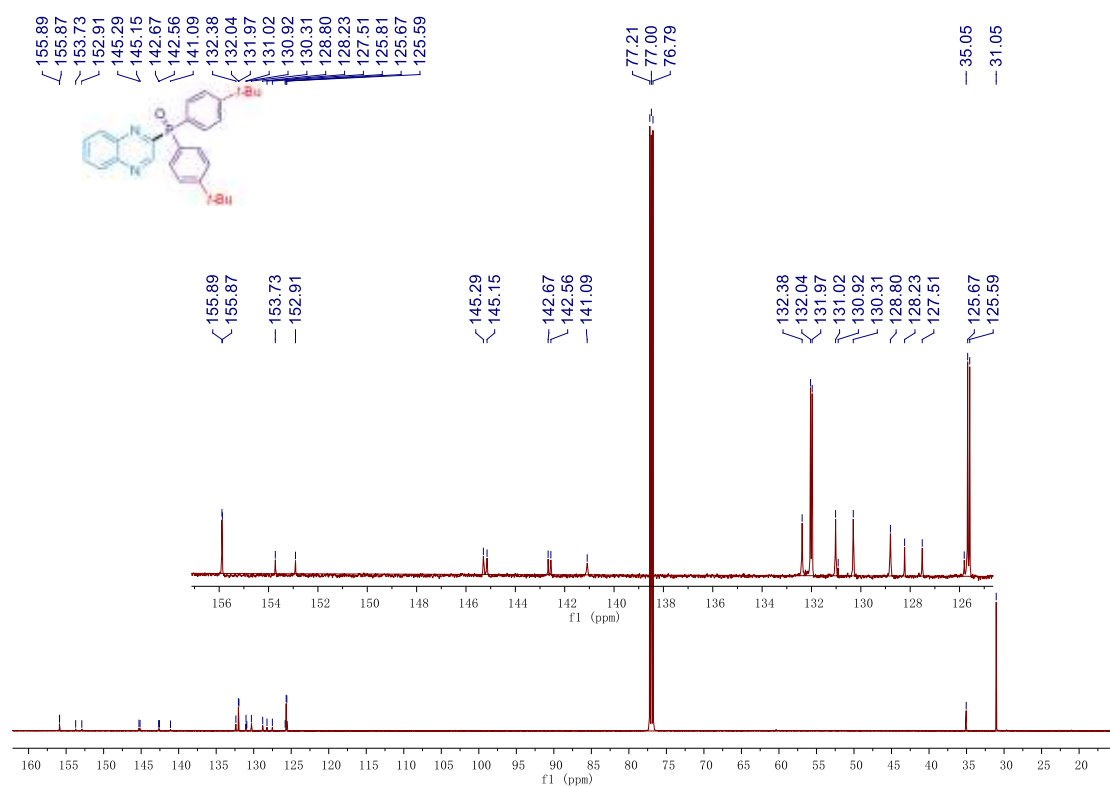

Fig.S 20  $^{13}\text{C}$  NMR of compound 3af

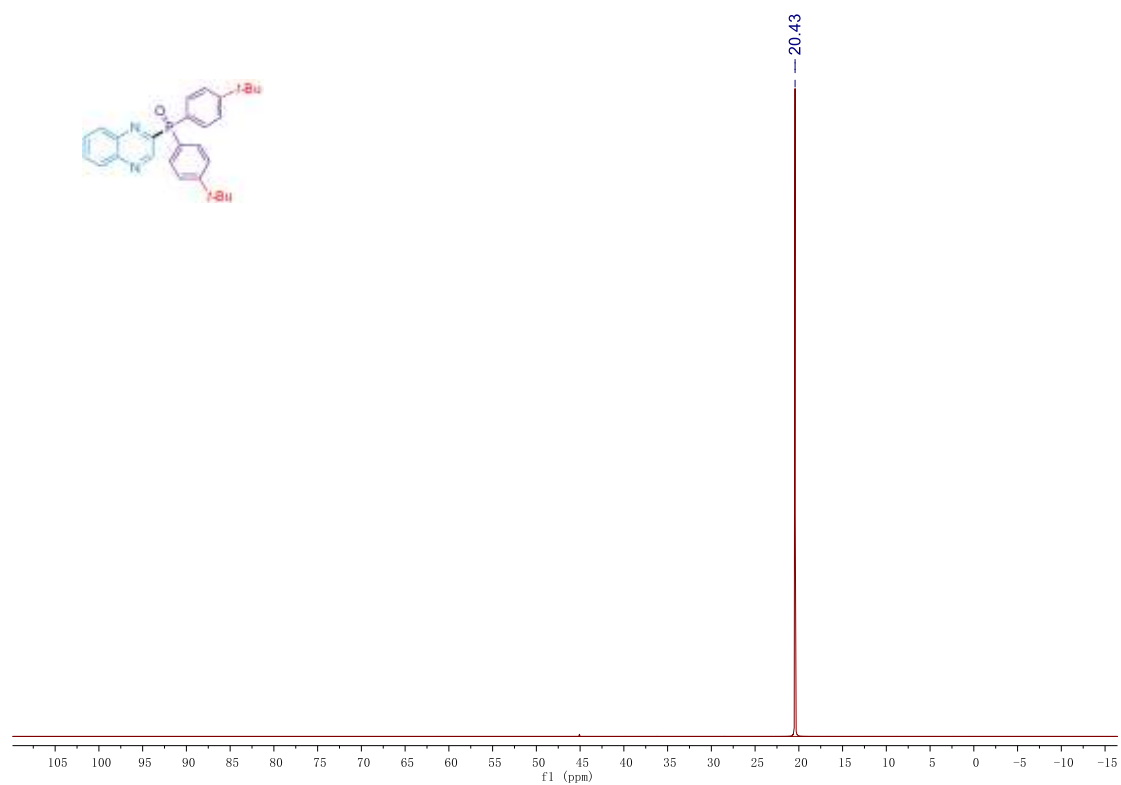

Fig.S 21  $^{31}\text{P}$  NMR of compound 3af

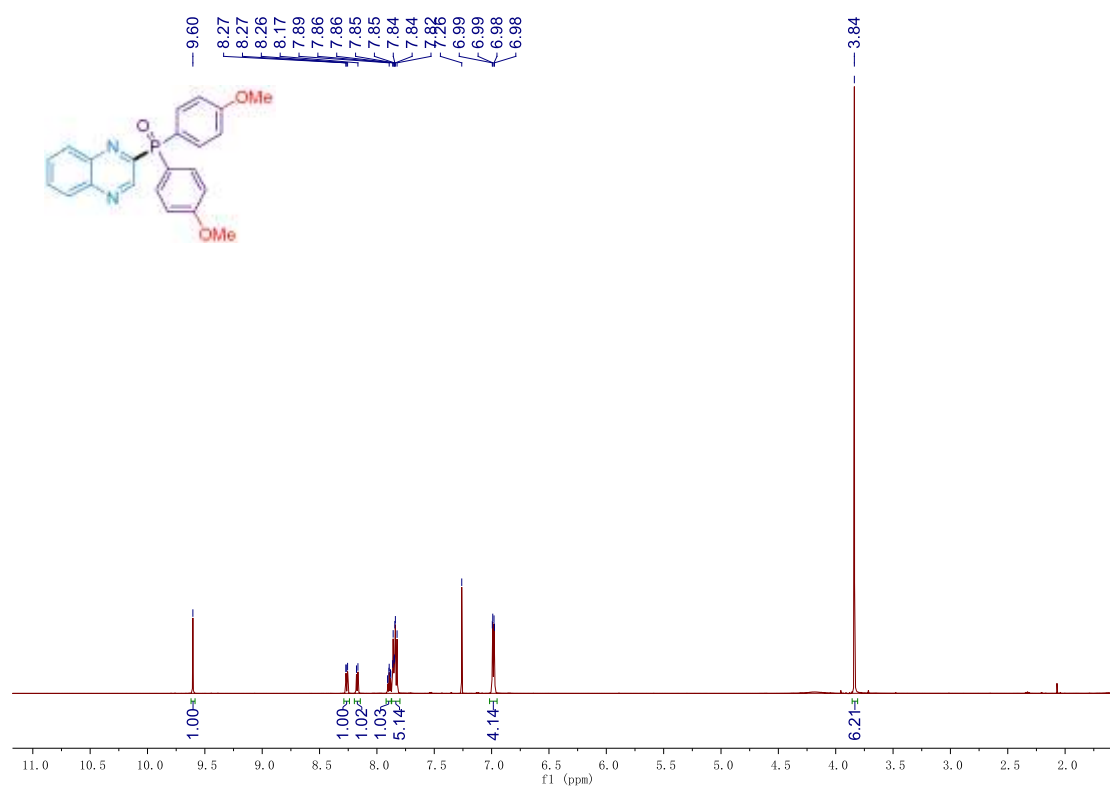

Fig.S 22  $^1\text{H}$  NMR of compound 3ag

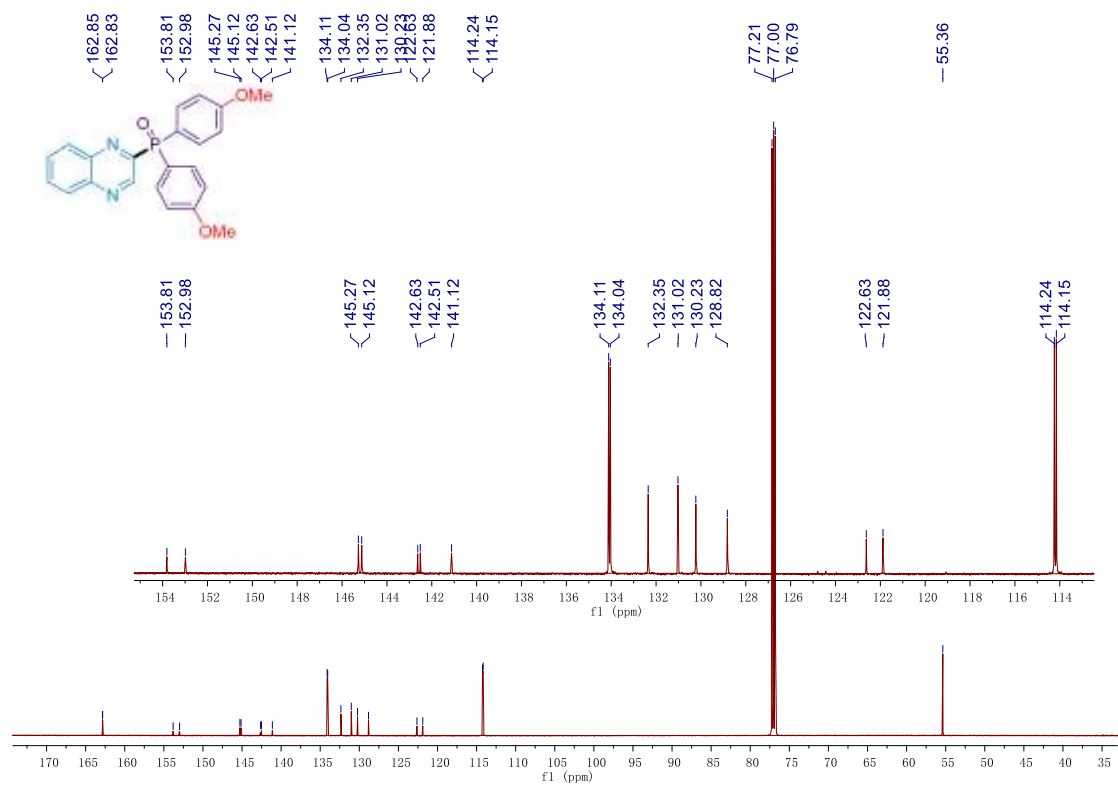

Fig.S 23 <sup>13</sup>C NMR of compound **3ag**

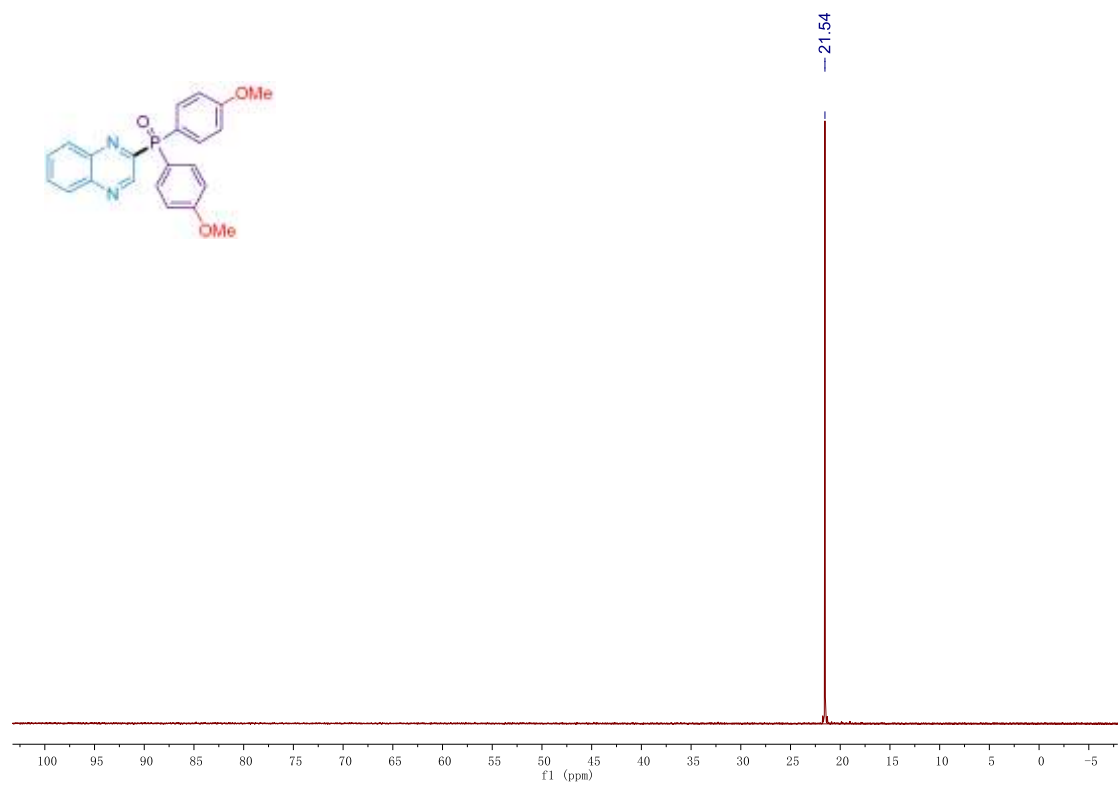

Fig.S 24 <sup>31</sup>P NMR of compound **3ag**

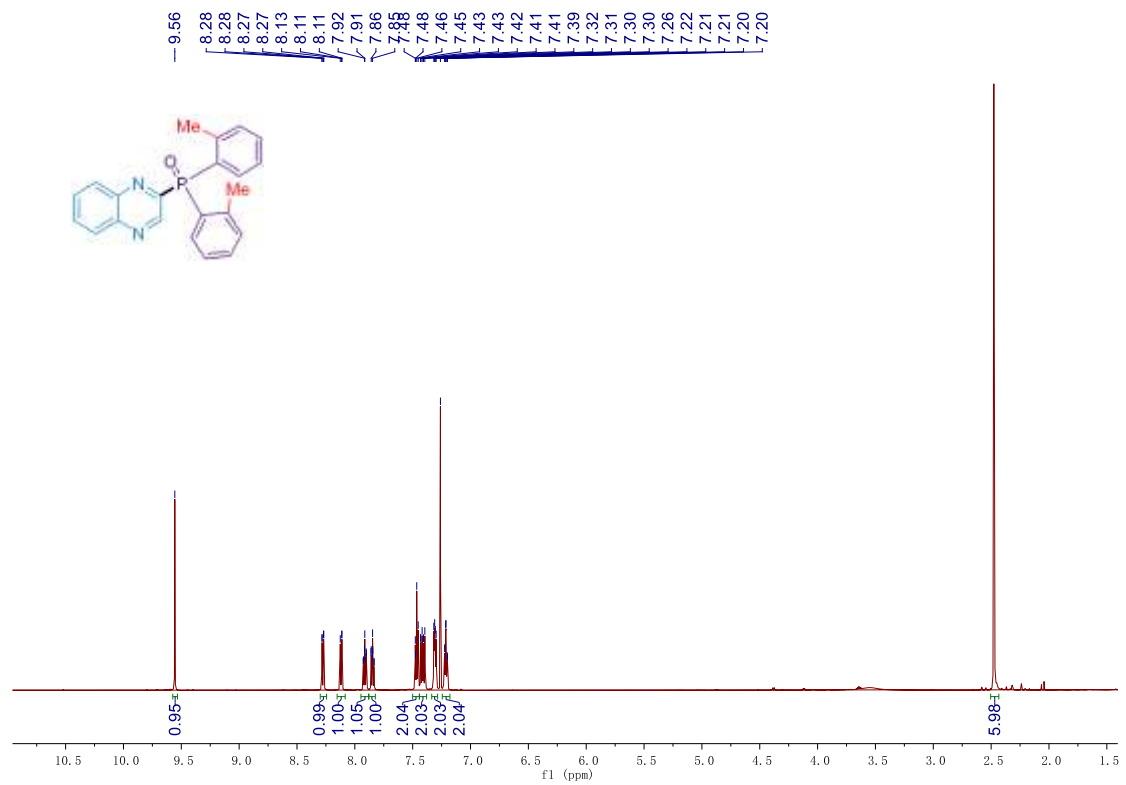

Fig.S 25 <sup>1</sup>H NMR of compound 3ah

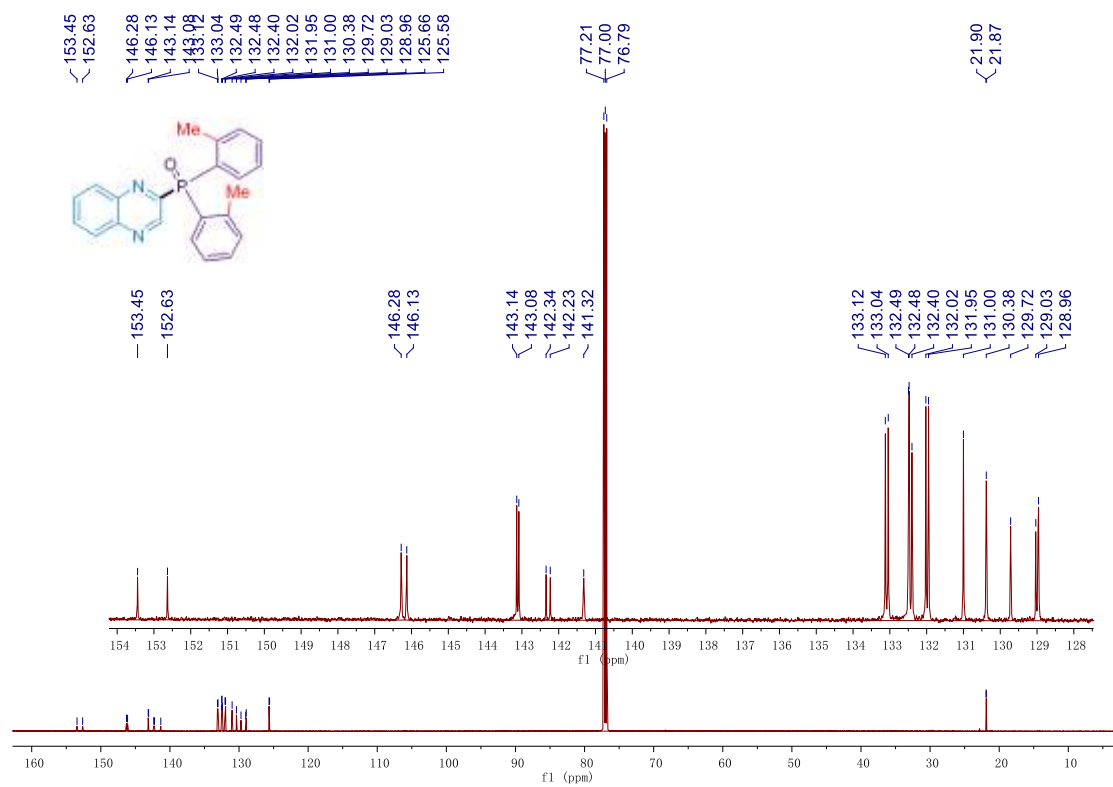

Fig.S 26 <sup>13</sup>C NMR of compound 3ah



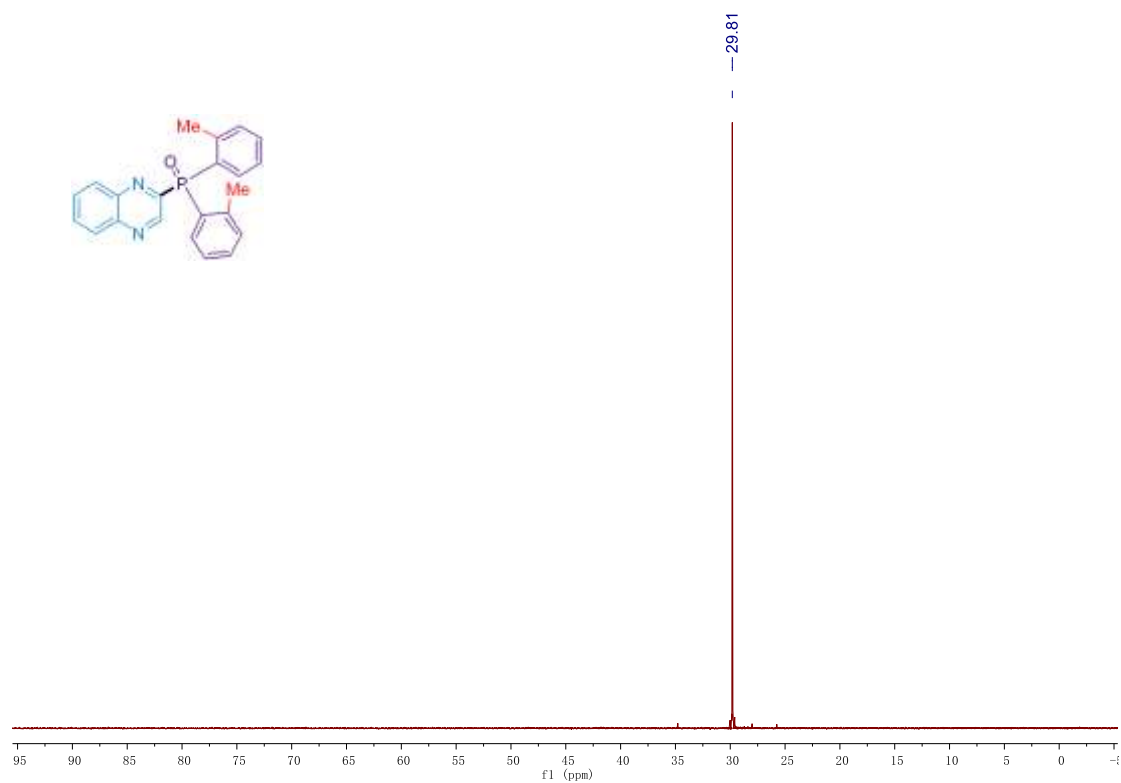

Fig.S 27  $^{31}\text{P}$  NMR of compound 3ah

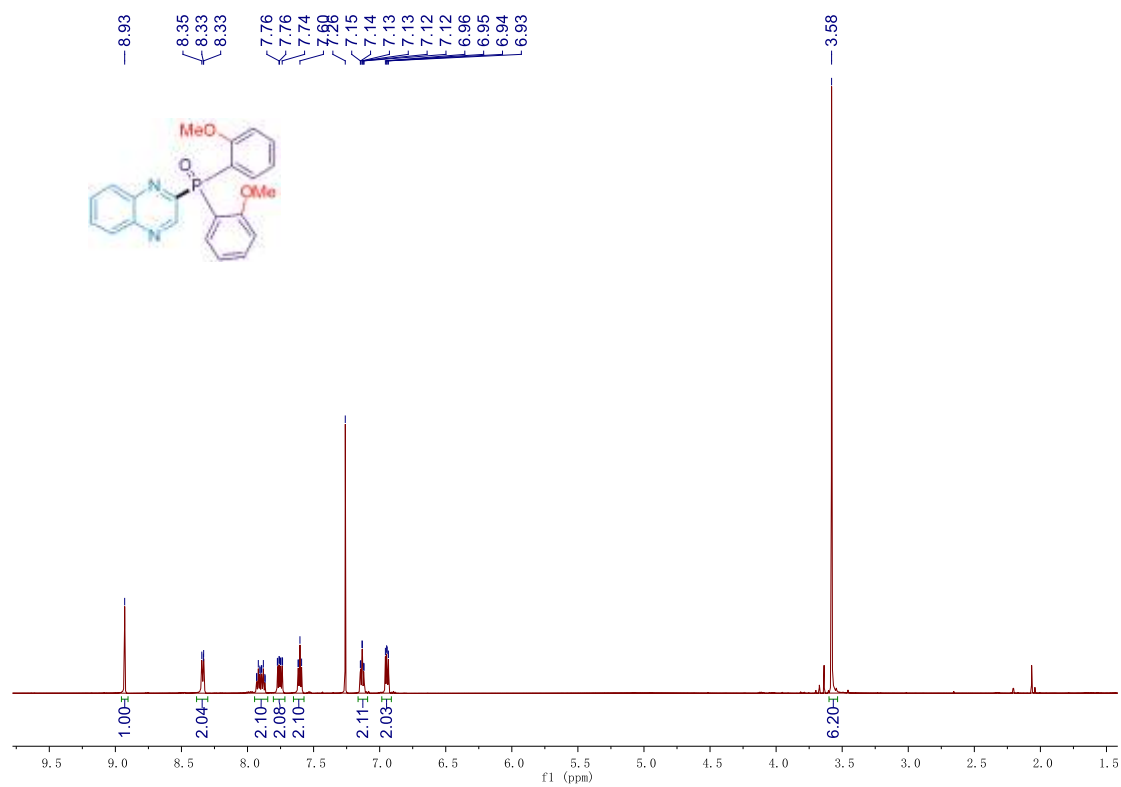

Fig.S 28  $^1\text{H}$  NMR of compound 3ai

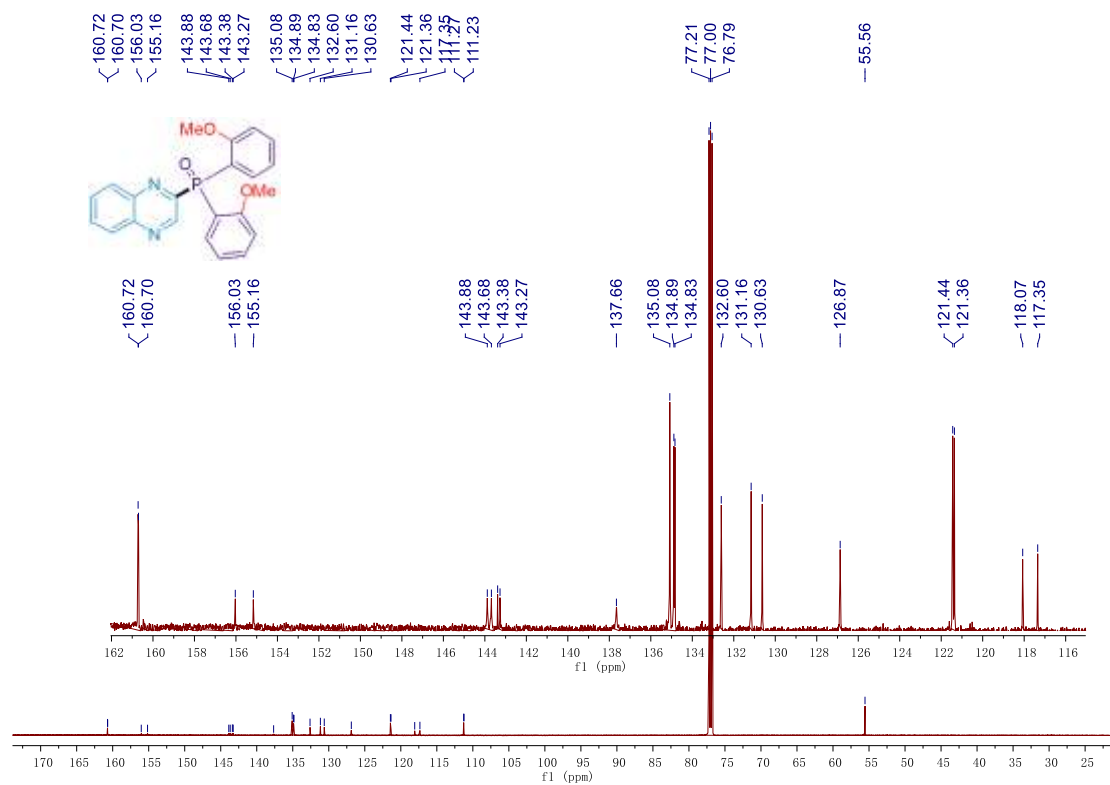

Fig.S 29  $^{13}\text{C}$  NMR of compound 3ai

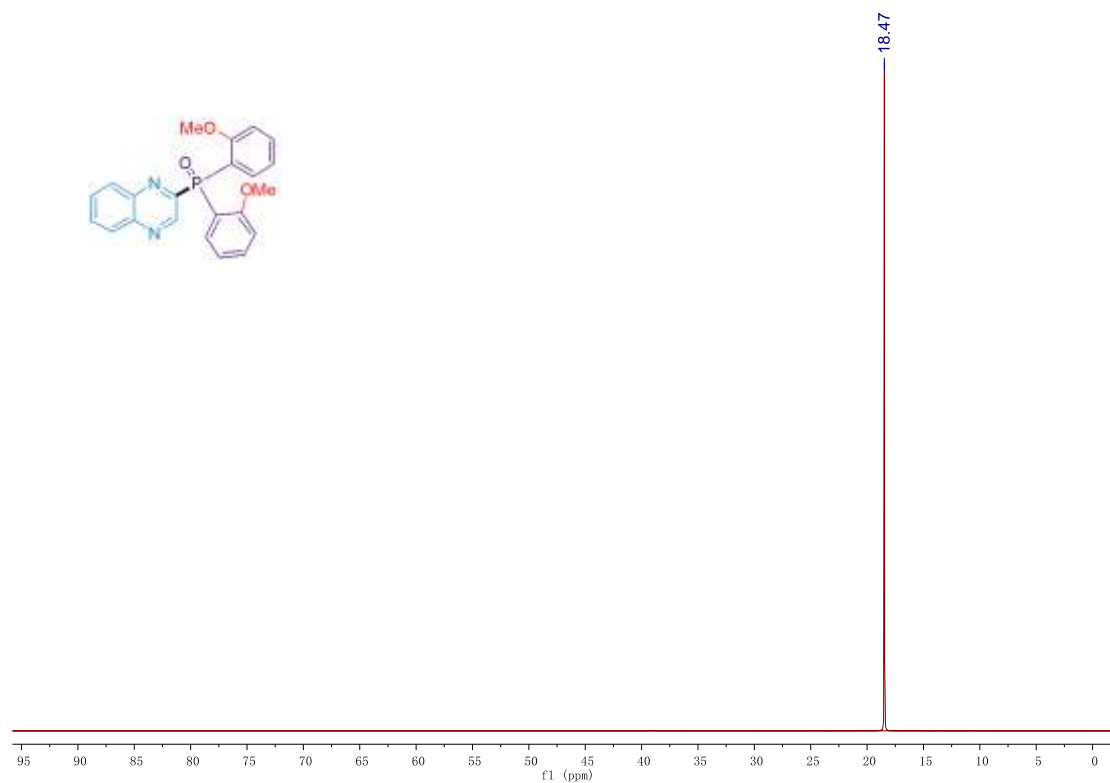

Fig.S 30  $^{31}\text{P}$  NMR of compound 3ai

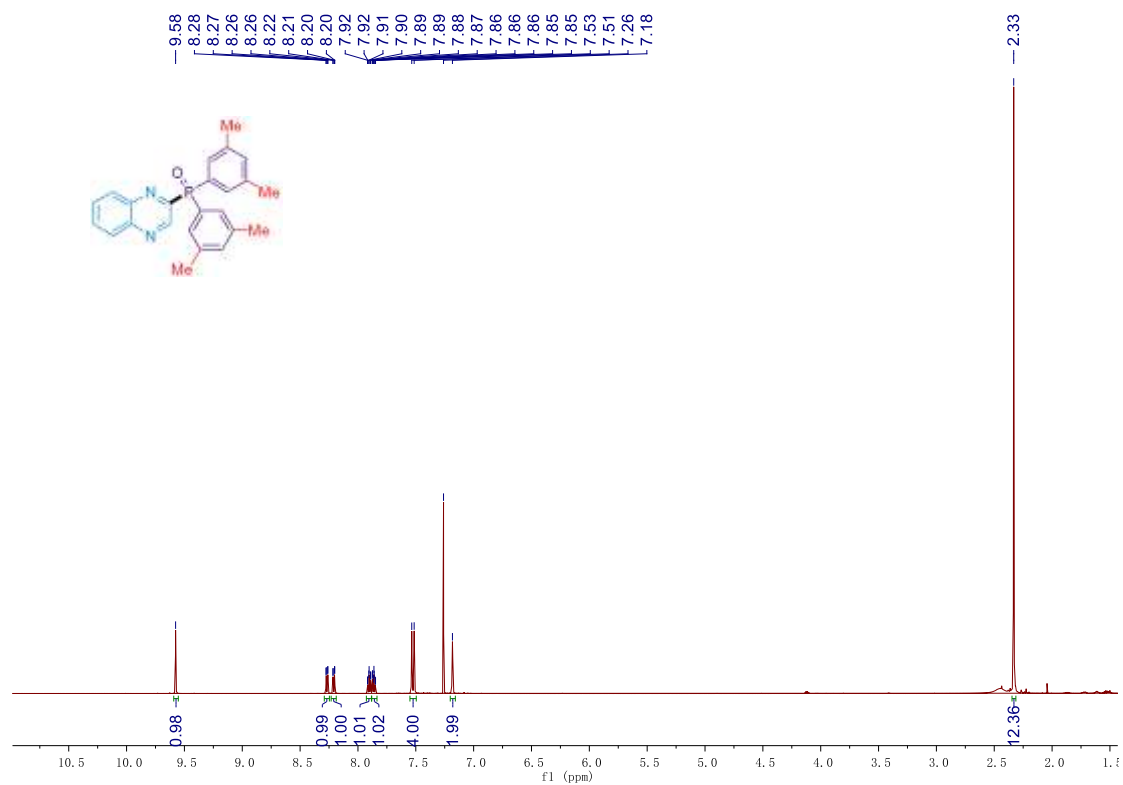

Fig.S 31  $^1\text{H NMR}$  of compound 3aj

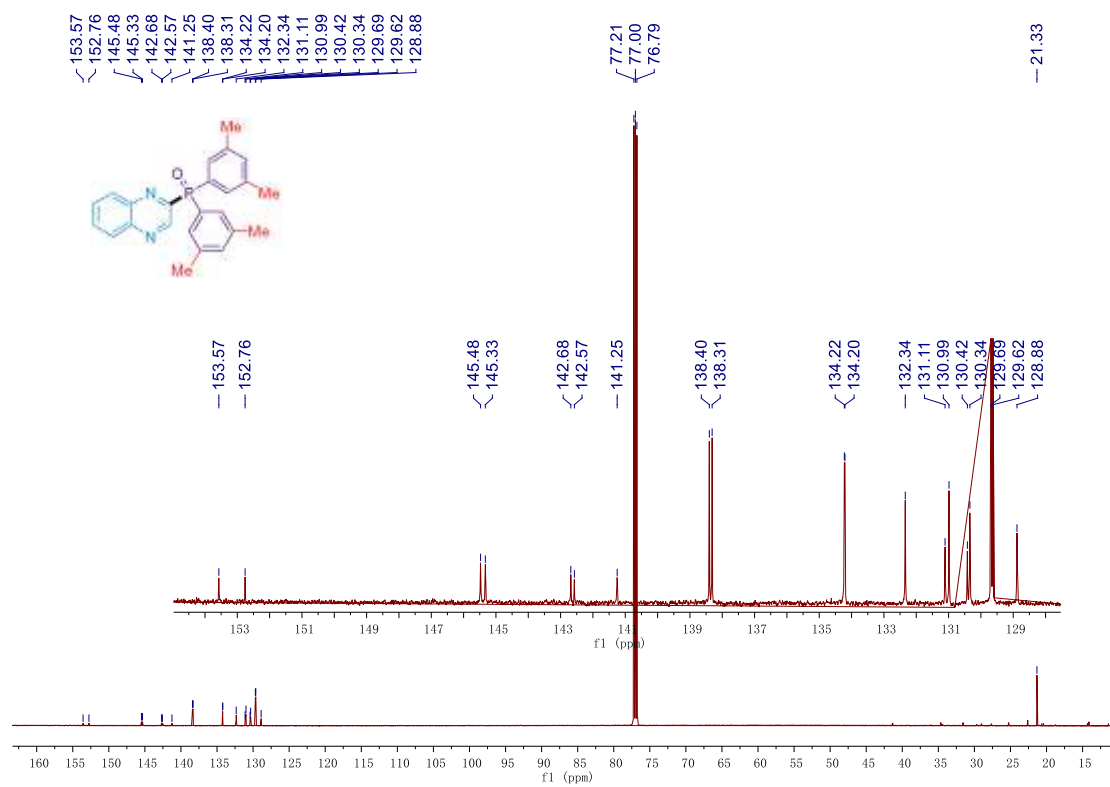

Fig.S 32  $^{13}\text{C NMR}$  of compound 3aj

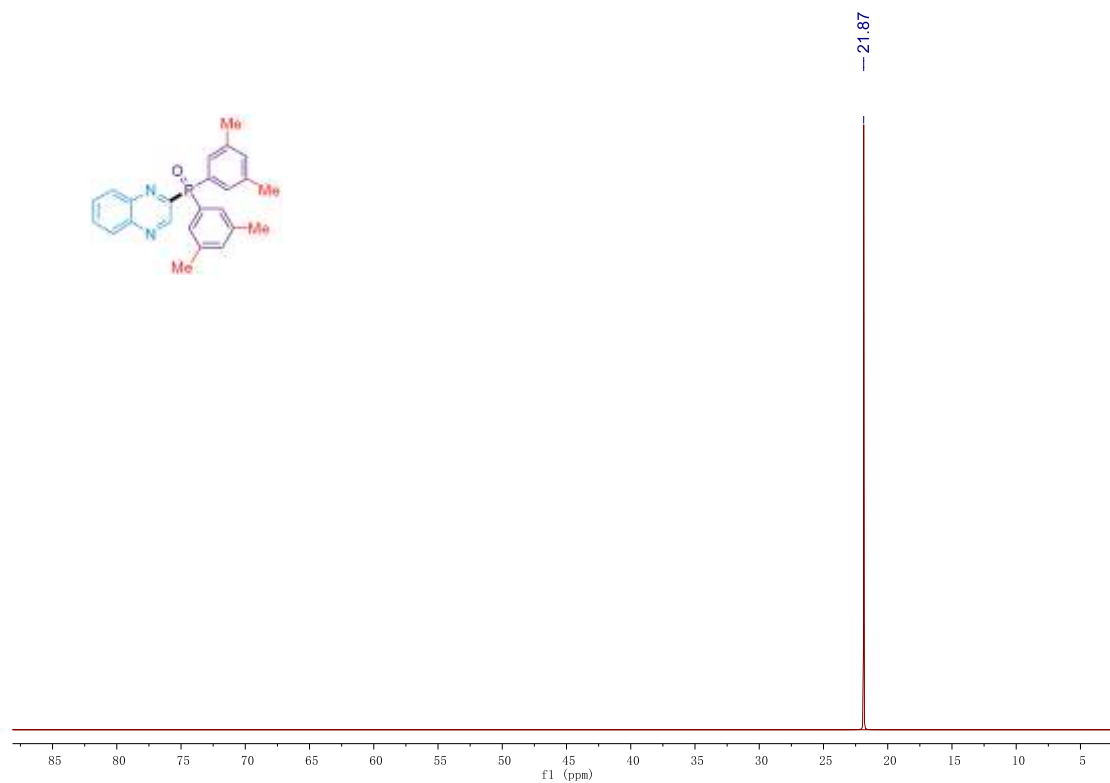

Fig.S 33  $^{31}\text{P}$  NMR of compound 3aj

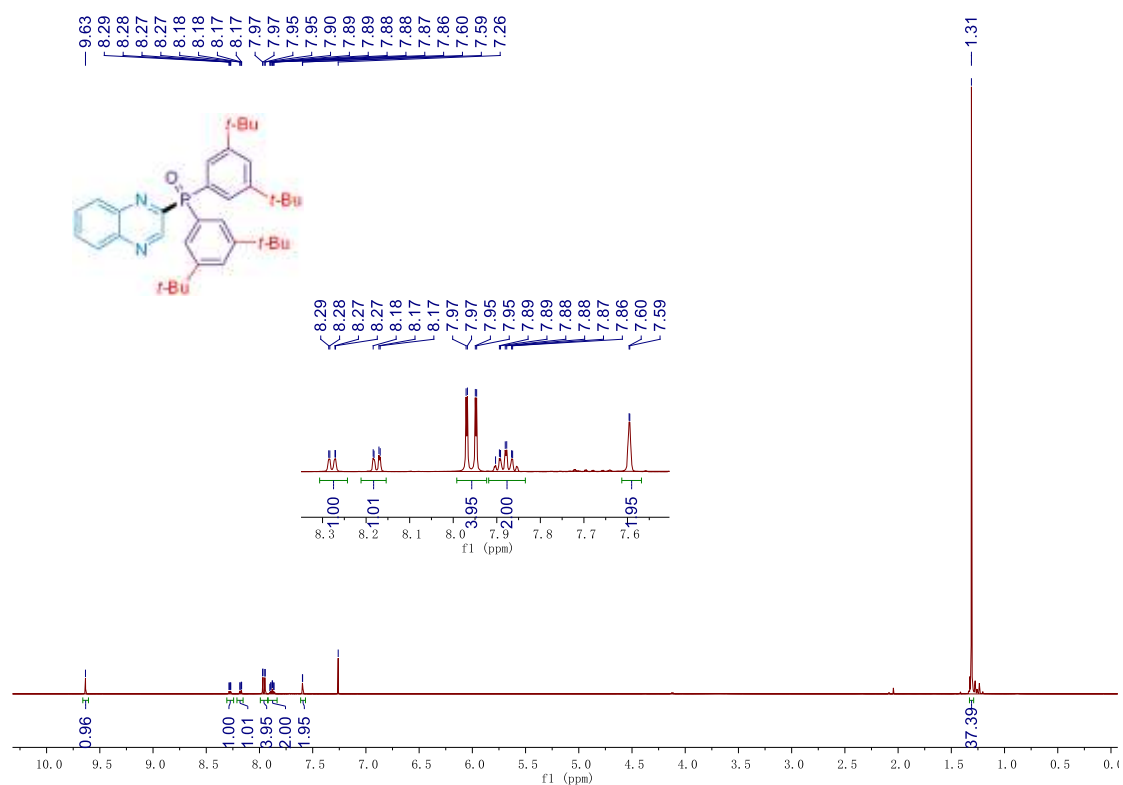

Fig.S 34  $^1\text{H}$  NMR of compound 3ak

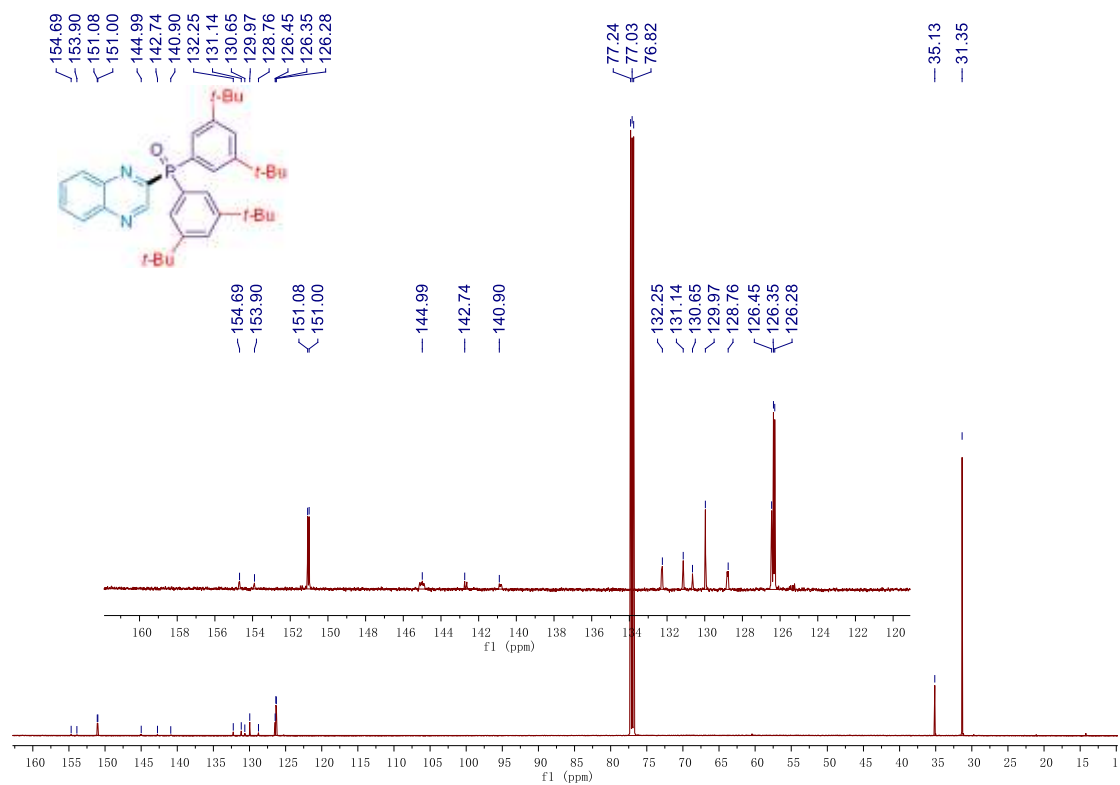

Fig.S 35  $^{13}\text{C}$  NMR of compound **3ak**

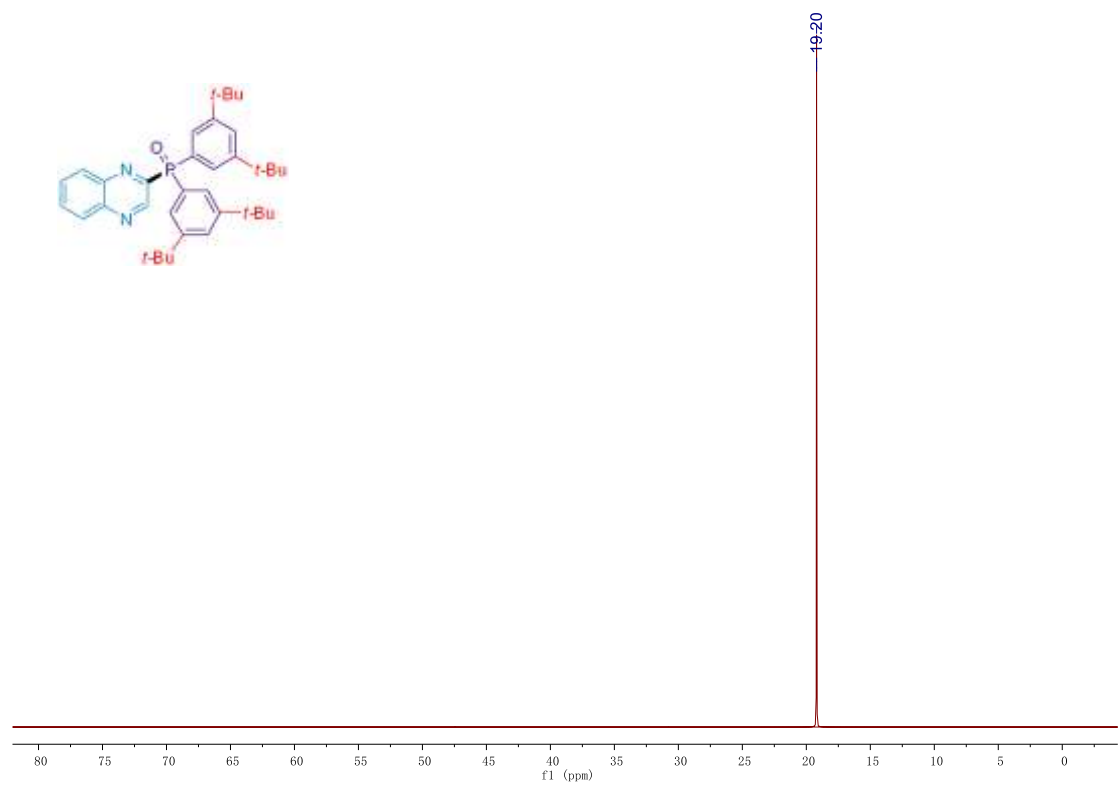

Fig.S 36  $^{31}\text{P}$  NMR of compound **3ak**

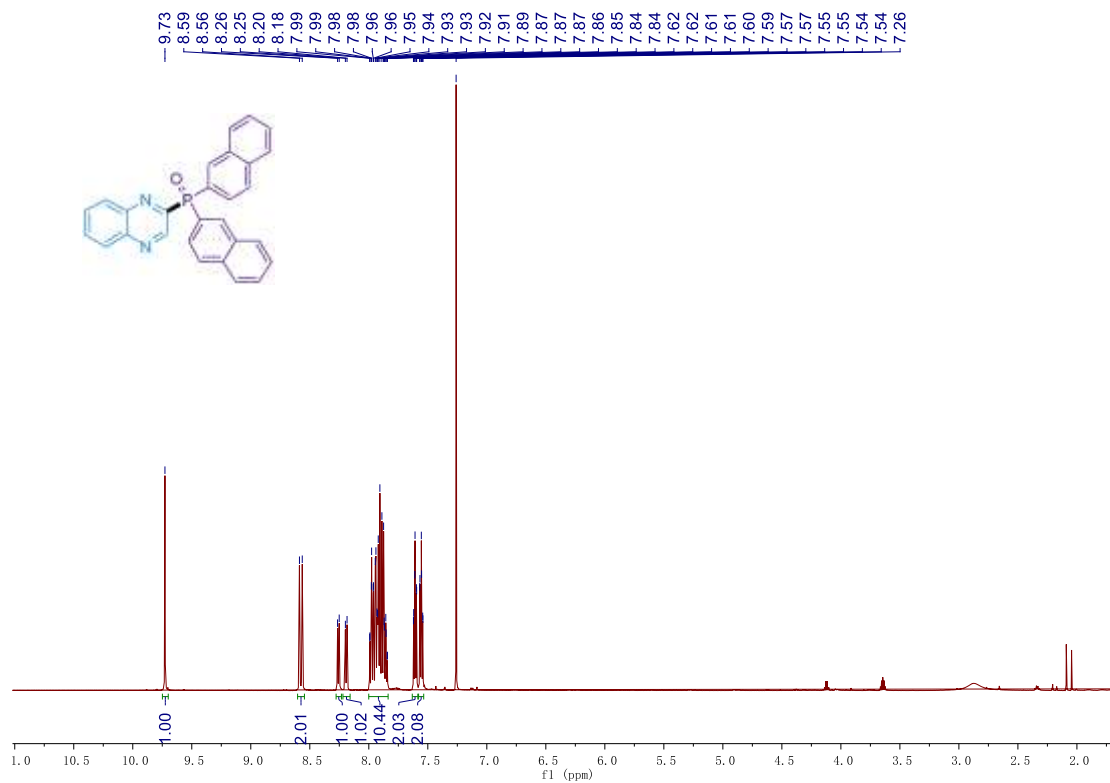

Fig.S 37  $^1\text{H NMR}$  of compound 3am

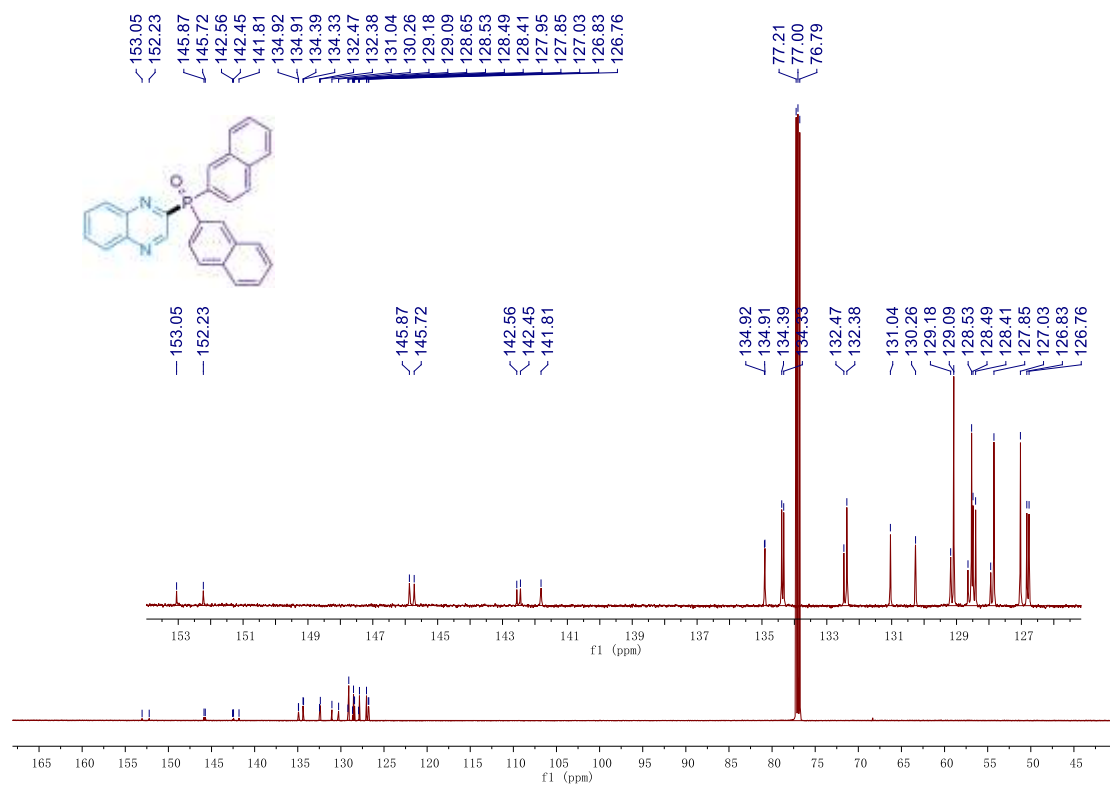

Fig.S 38  $^{13}\text{C NMR}$  of compound 3am

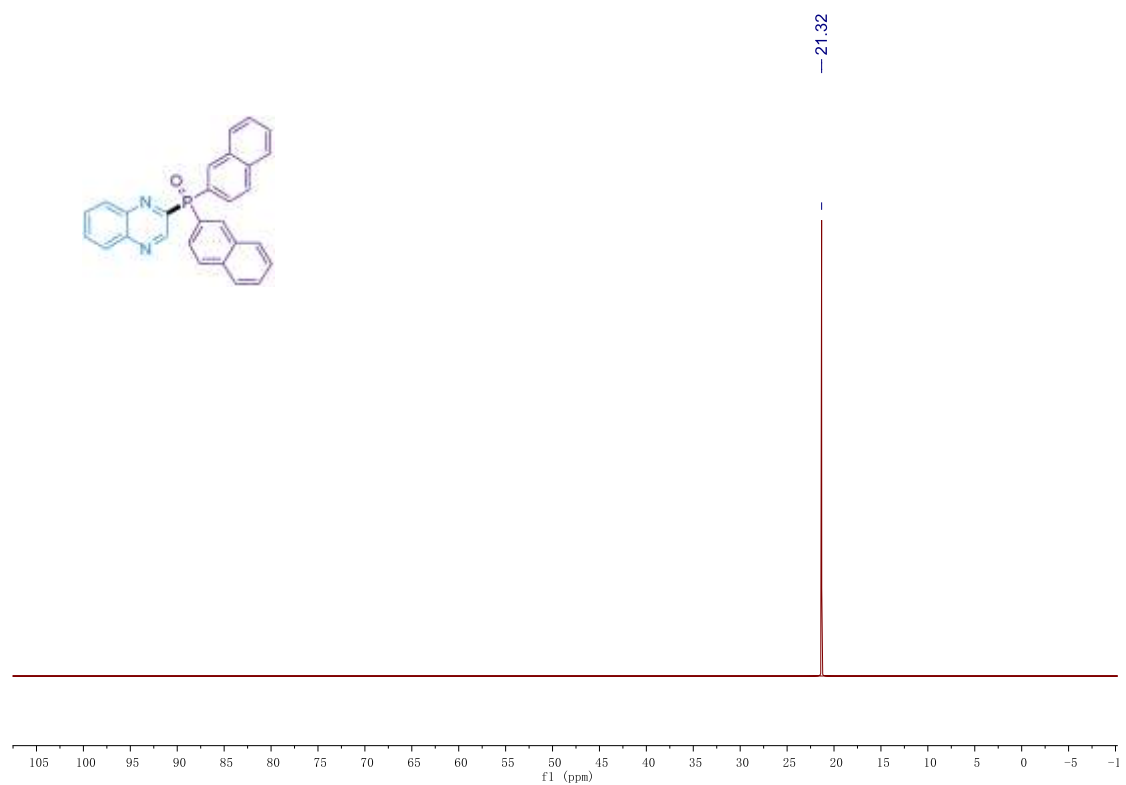

Fig.S 39  $^{31}\text{P}$  NMR of compound 3am

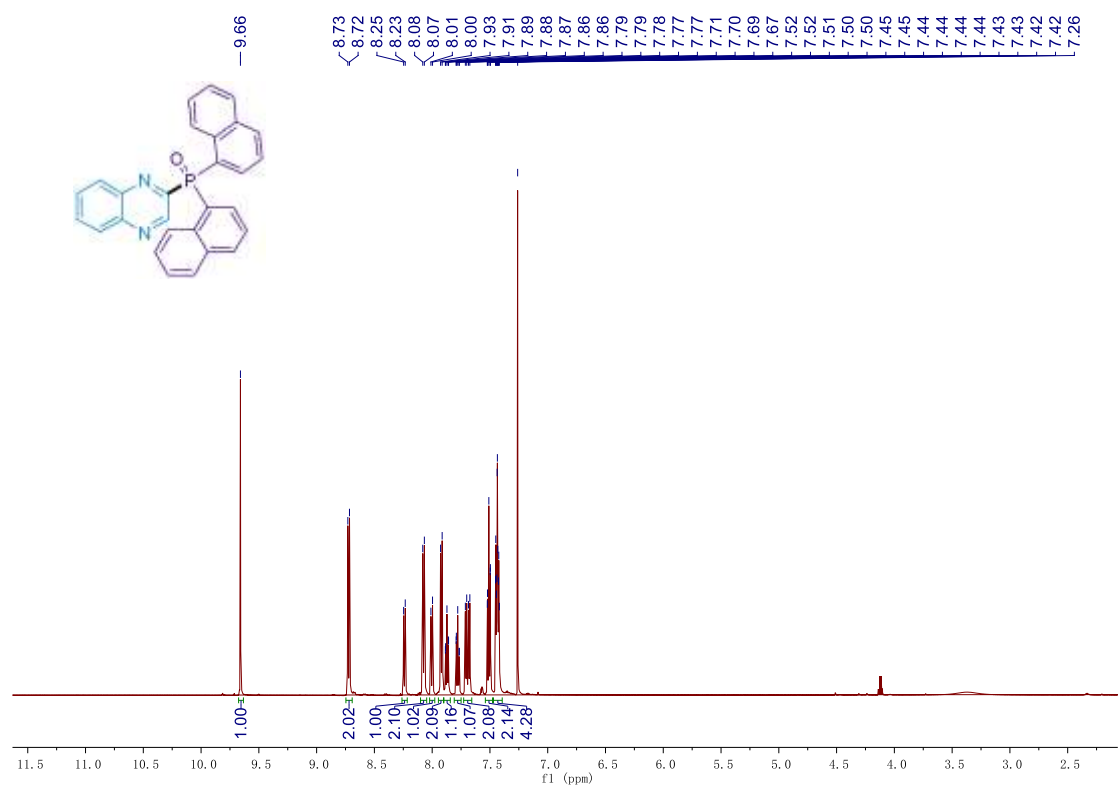

Fig.S 40  $^1\text{H}$  NMR of compound 3am

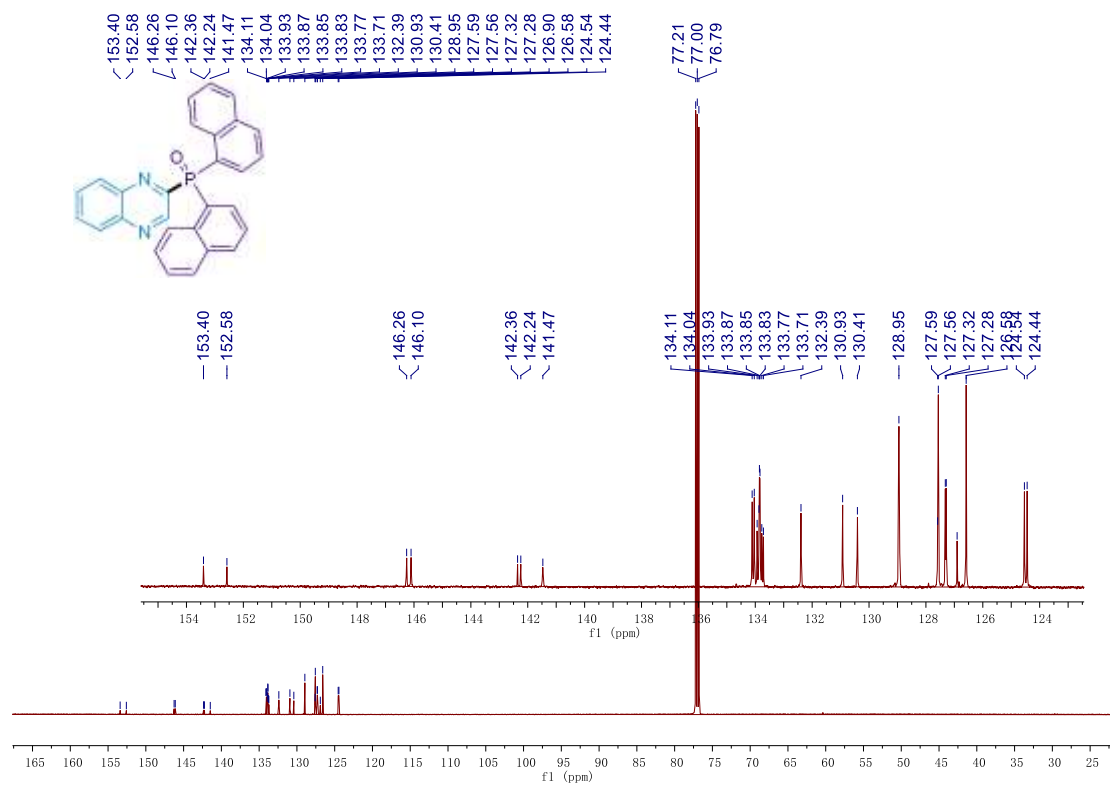

Fig.S 41  $^{13}\text{C}$  NMR of compound 3an

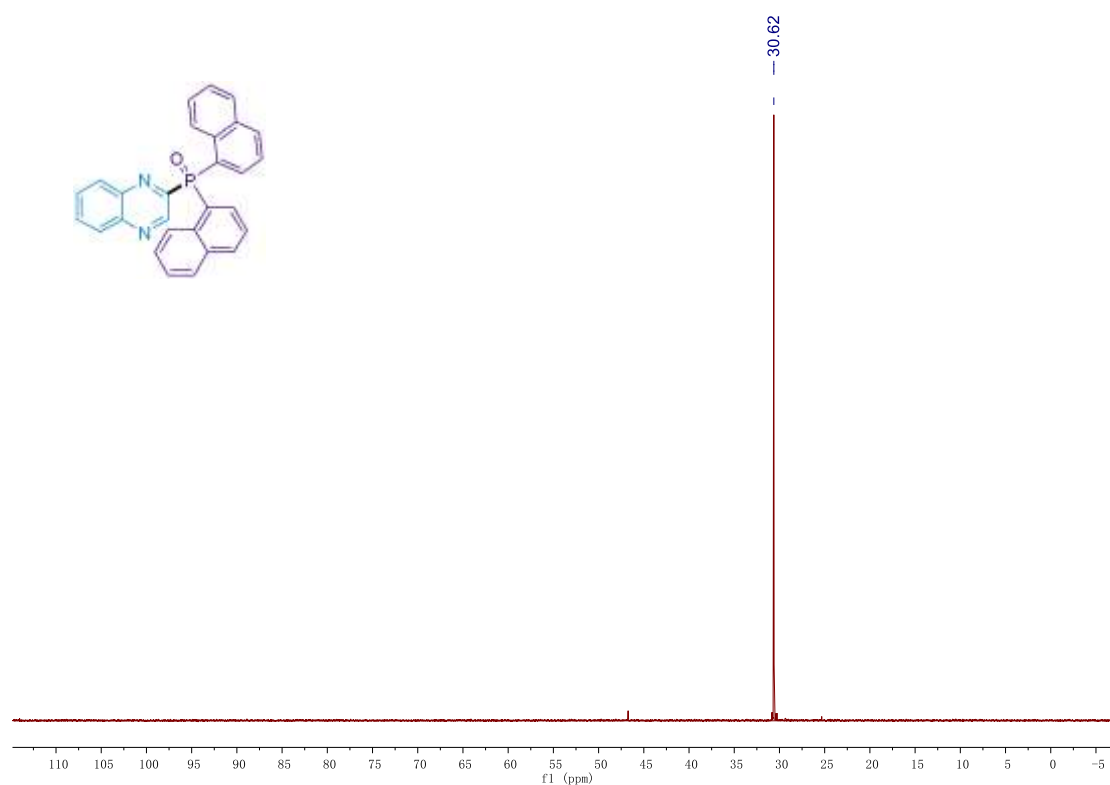

Fig.S 42  $^{31}\text{P}$  NMR of compound 3an



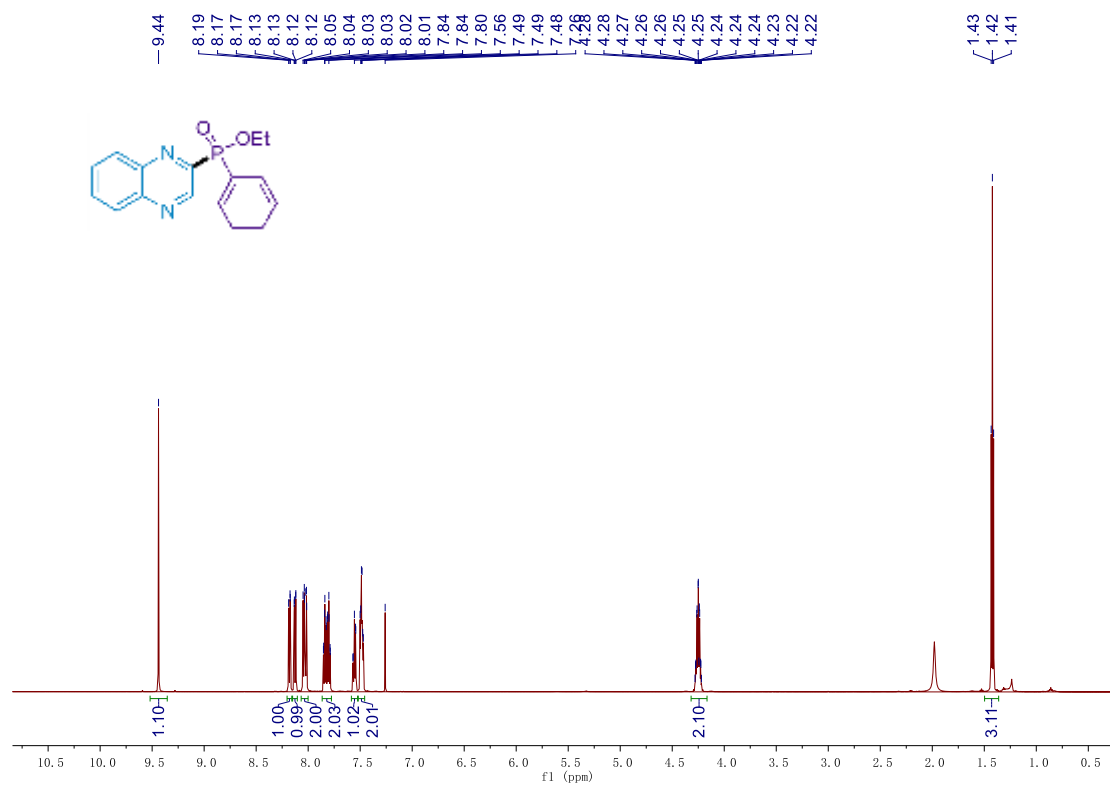

Fig.S 43  $^1\text{H NMR}$  of compound 3ao

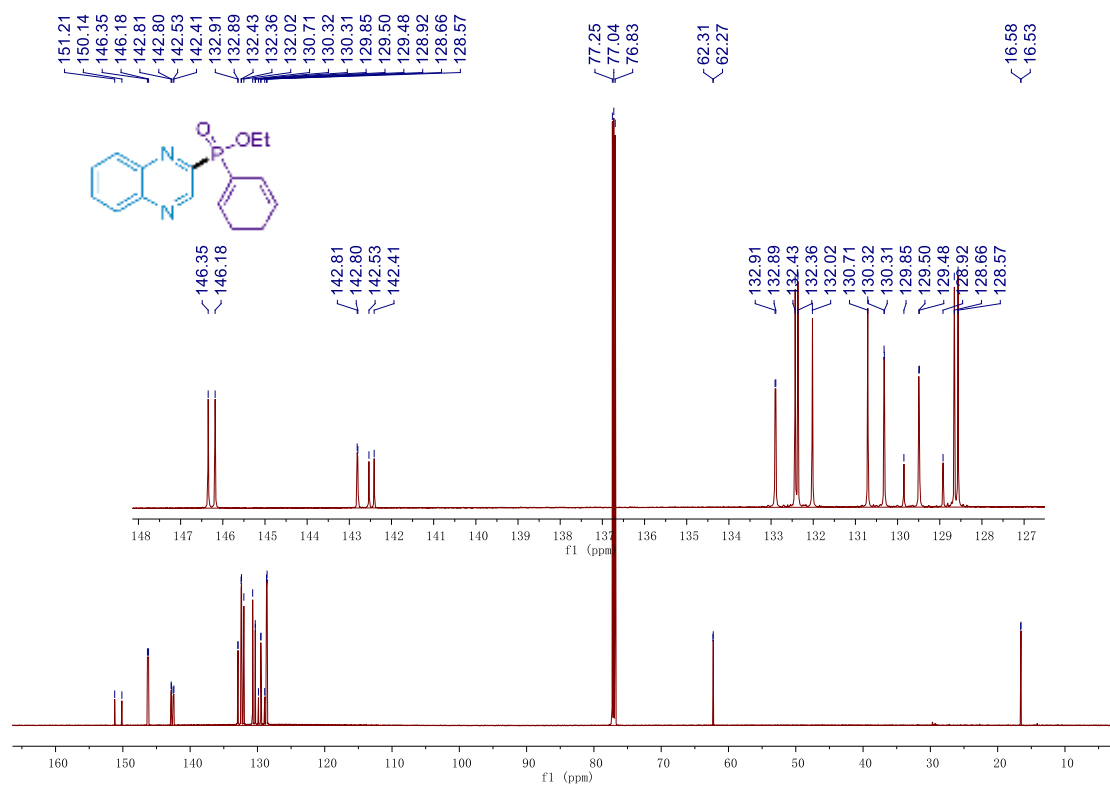

Fig.S 44  $^{13}\text{C NMR}$  of compound 3ao

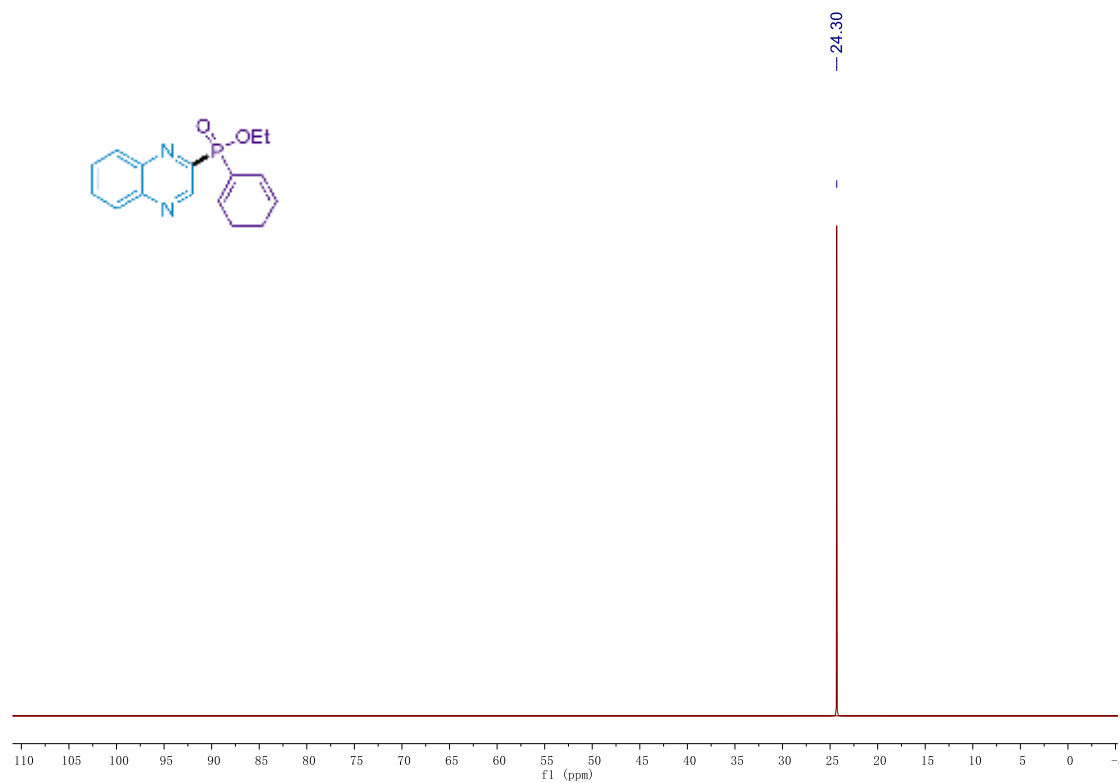

Fig.S 45  $^{31}\text{P}$  NMR of compound 3ao

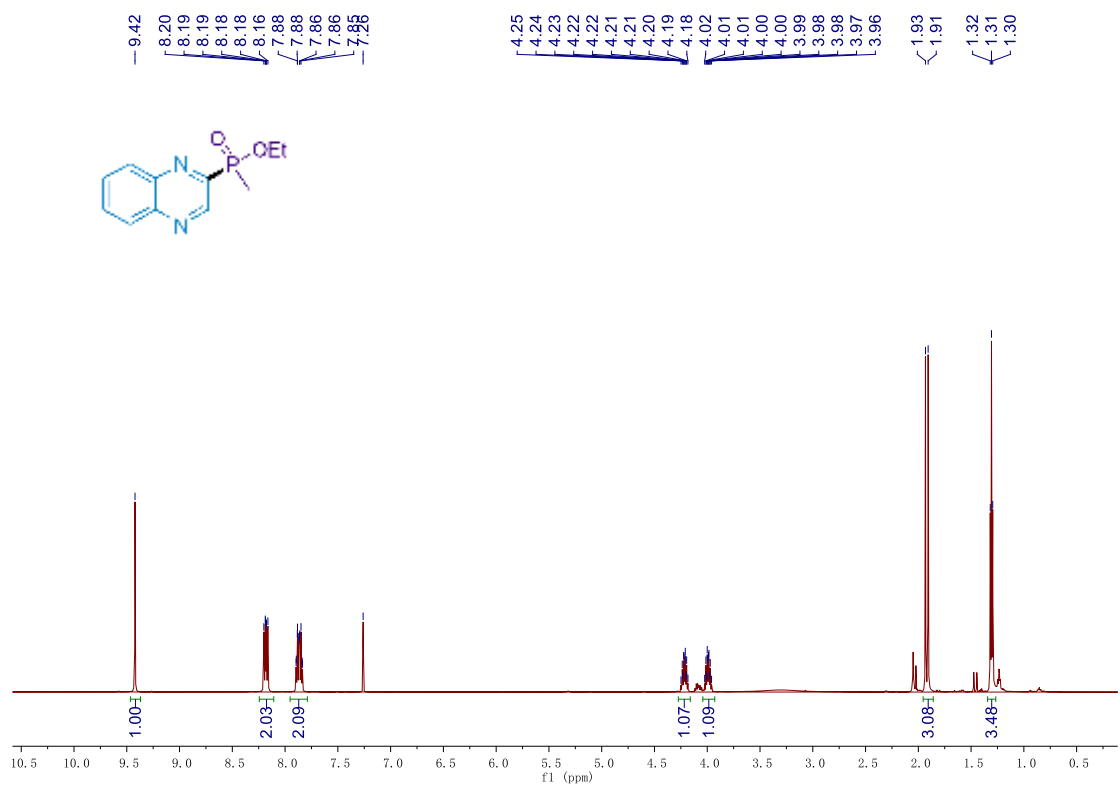

Fig.S 46  $^1\text{H}$  NMR of compound 3ap

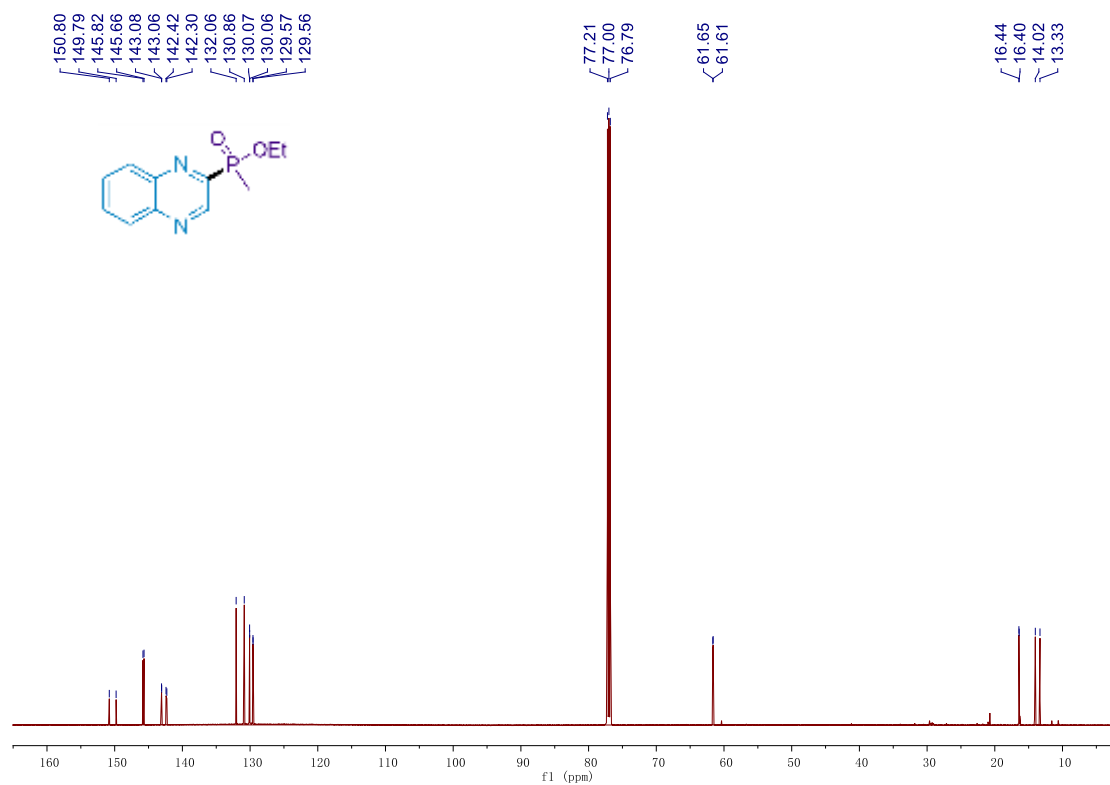

Fig.S 47  $^{13}\text{C}$  NMR of compound 3ap

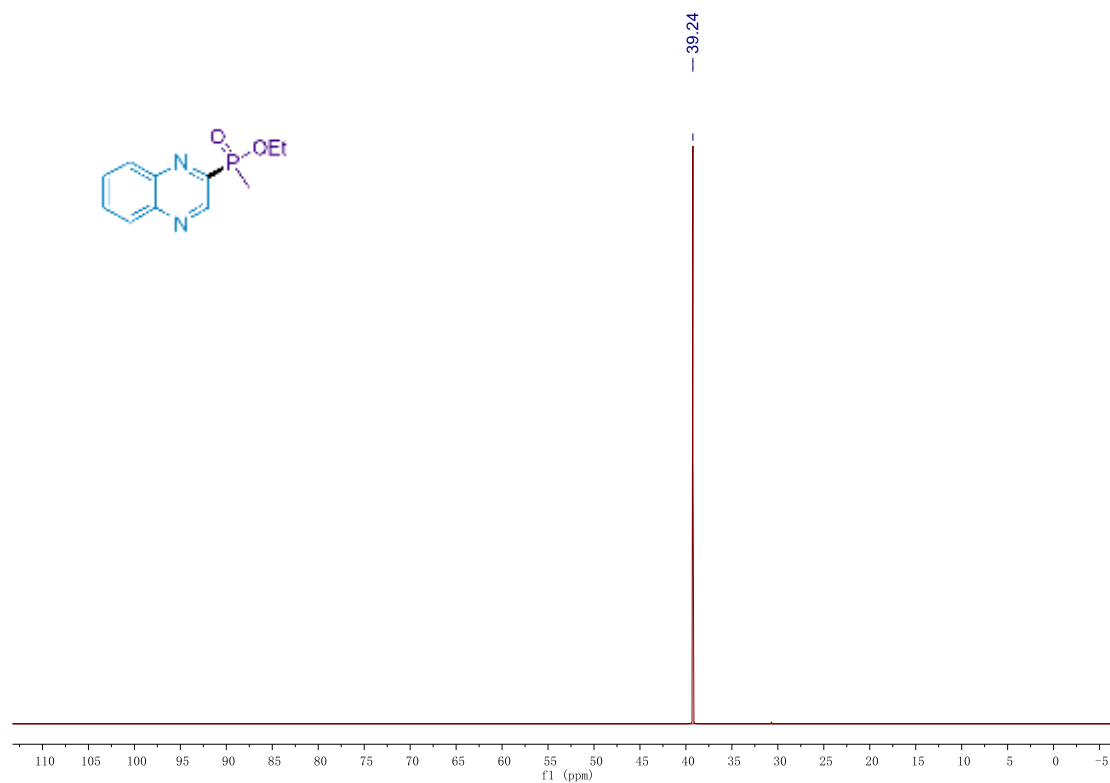

Fig.S 48  $^{31}\text{P}$  NMR of compound 3ap

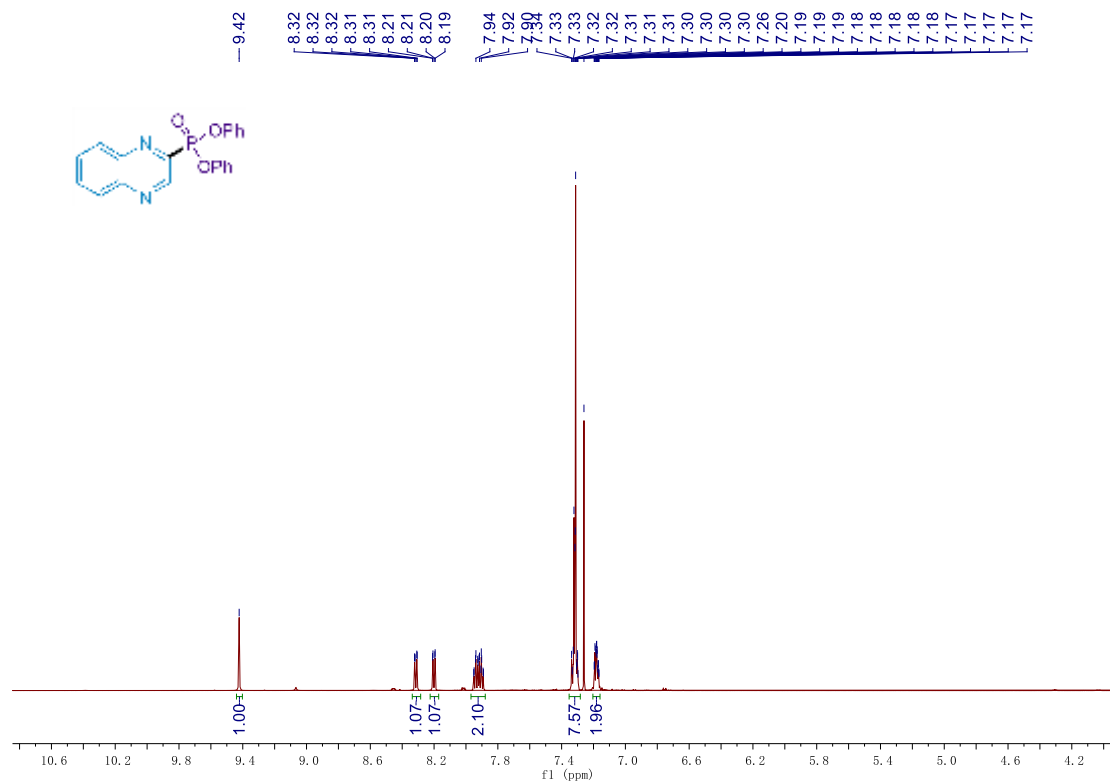

Fig.S 49  $^1\text{H NMR}$  of compound 3aq

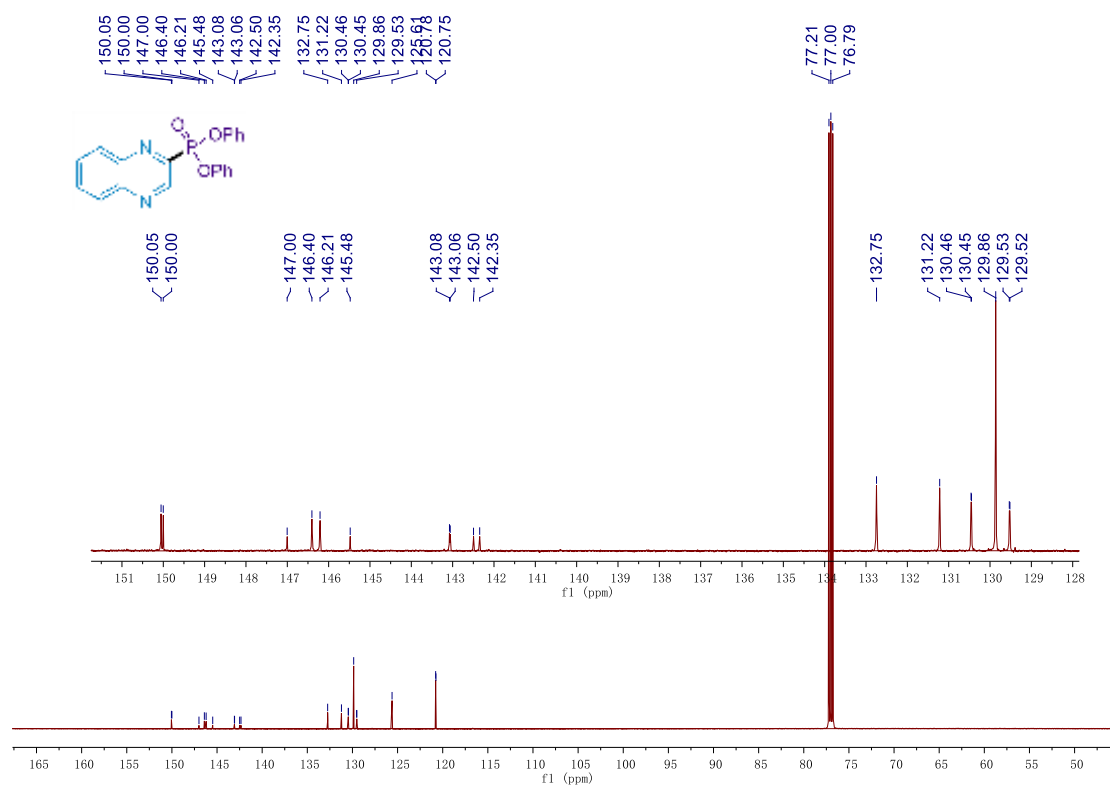

Fig.S 50  $^{13}\text{C NMR}$  of compound 3aq

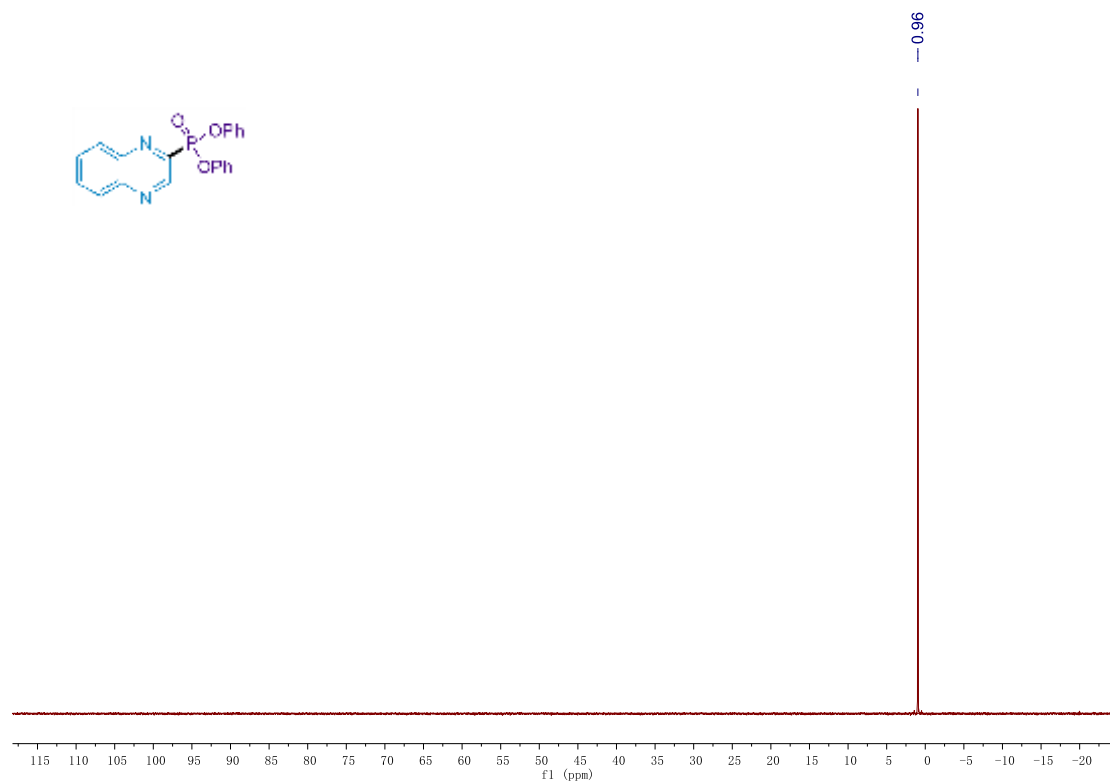

Fig.S 51  $^{31}\text{P}$  NMR of compound 3aq

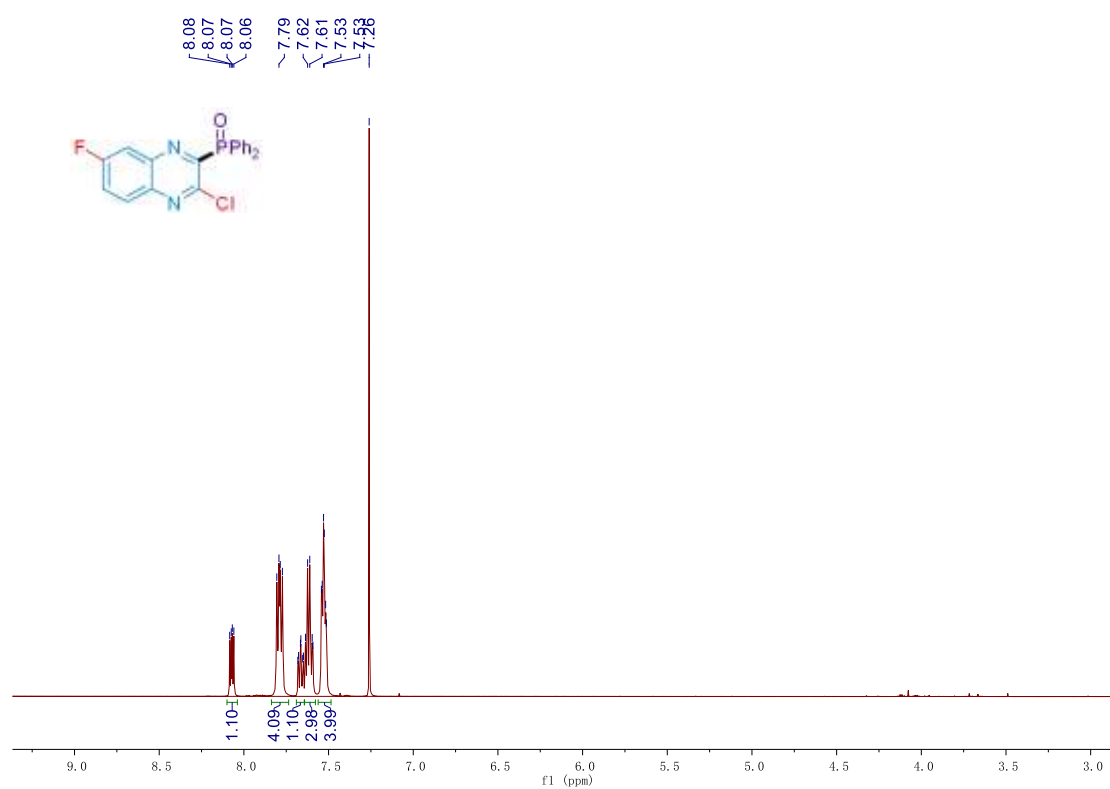

Fig.S 52  $^1\text{H}$  NMR of compound 3ca

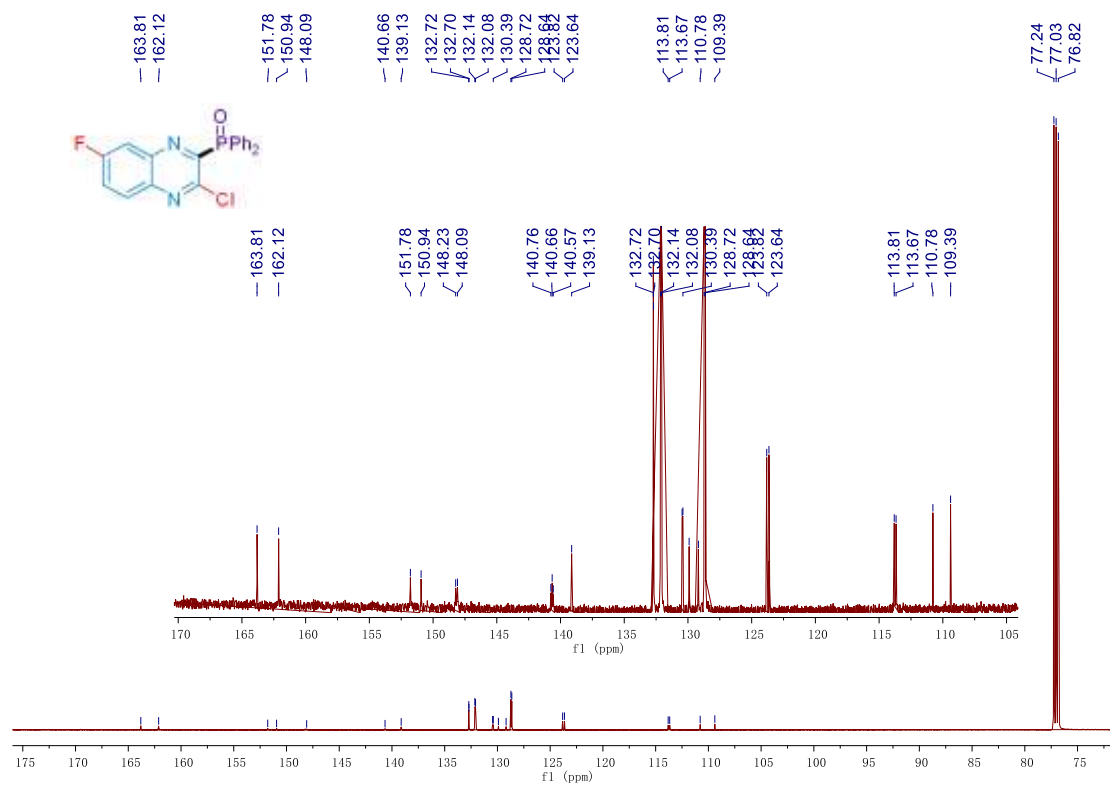

Fig.S 53 <sup>13</sup>C NMR of compound 3ca

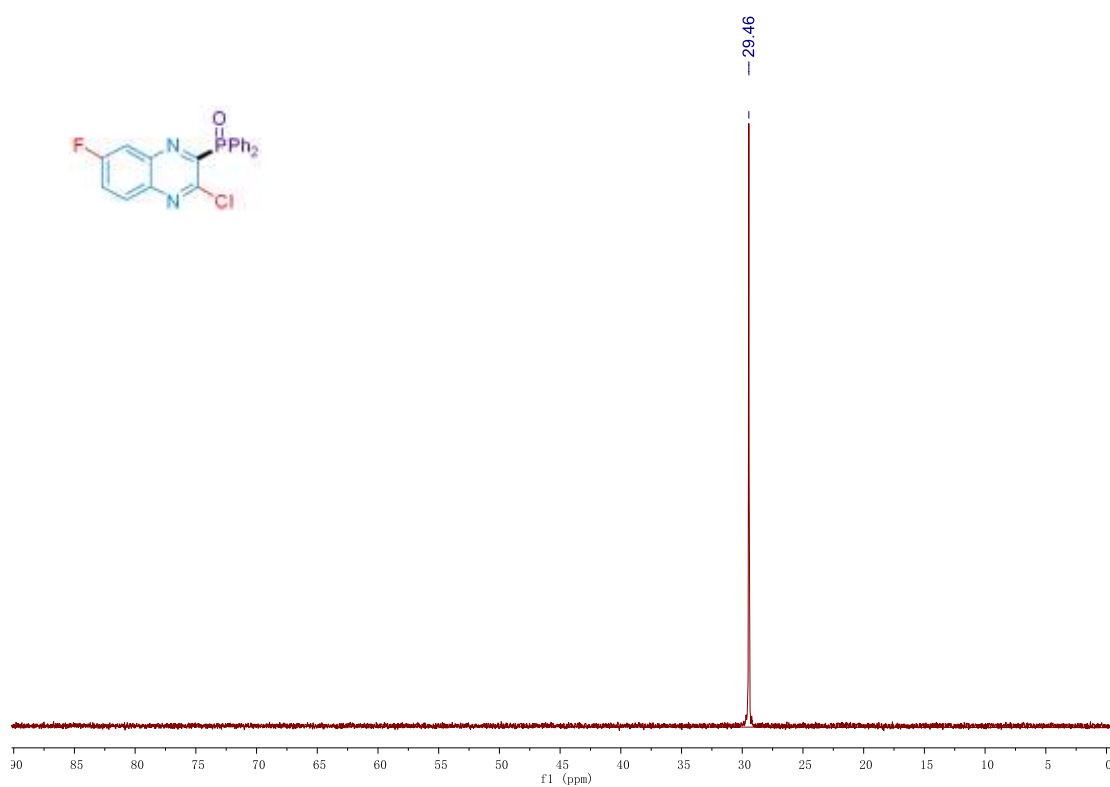

Fig.S 54 <sup>31</sup>P NMR of compound 3ca

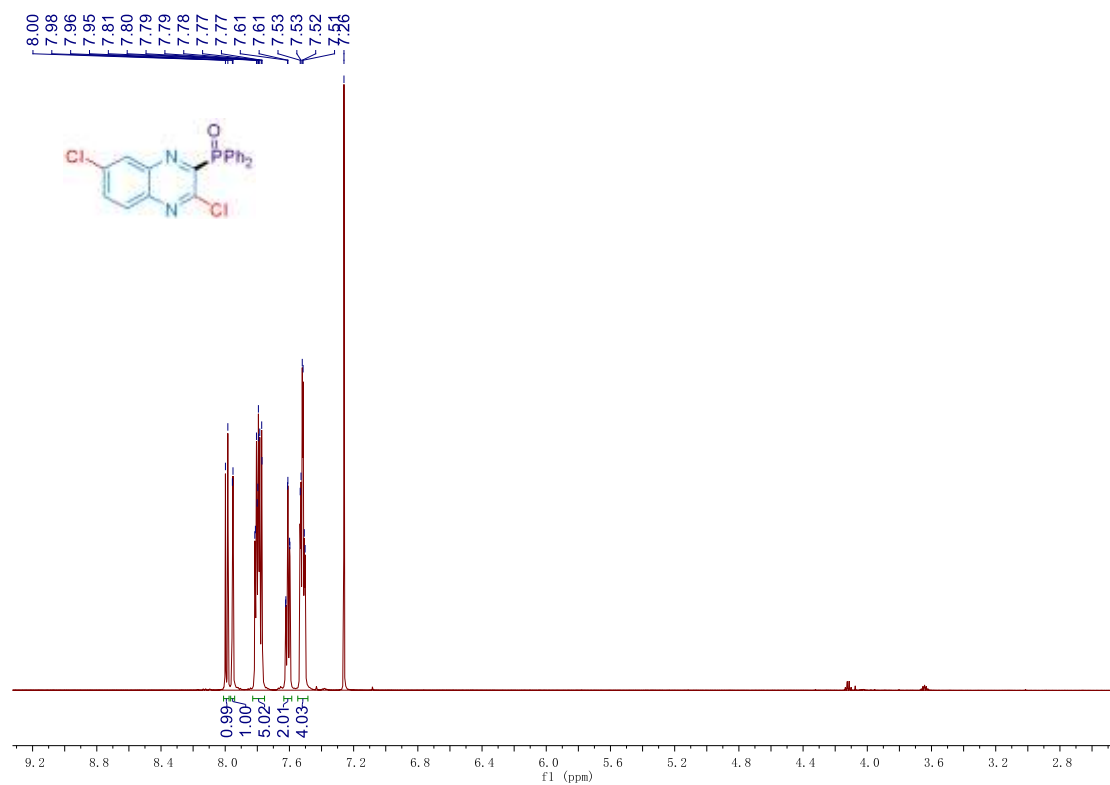

Fig.S 55 <sup>1</sup>H NMR of compound 3da

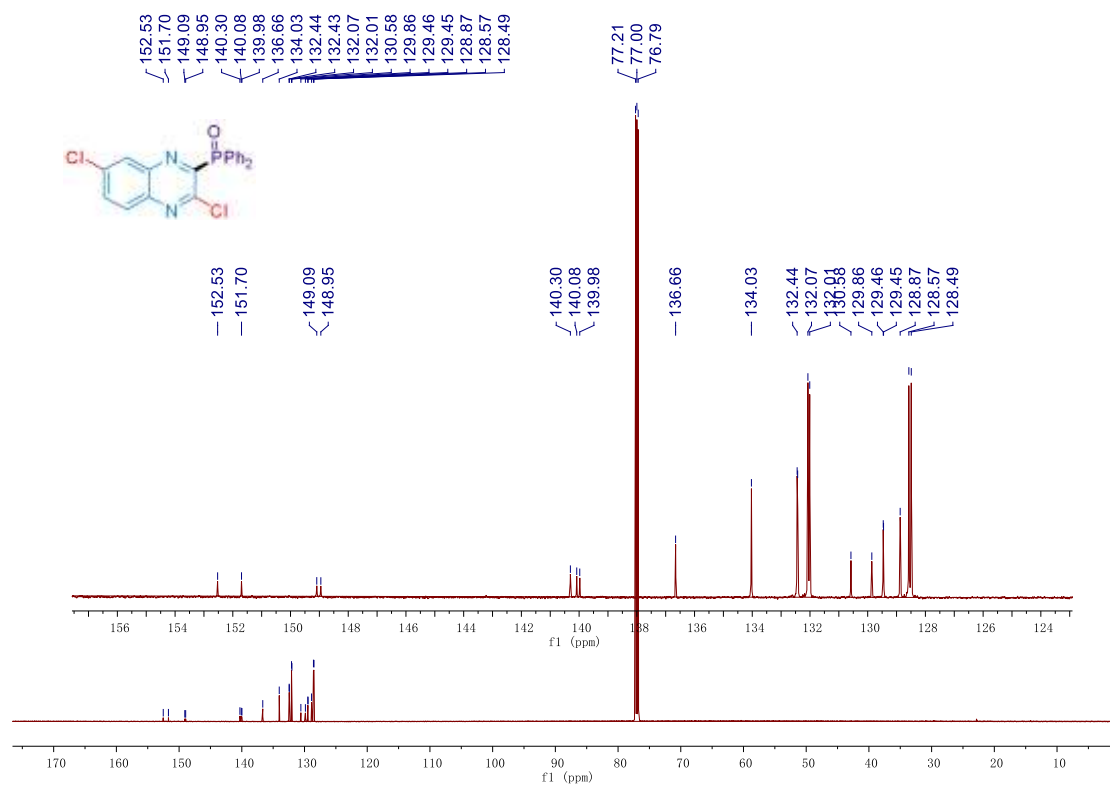

Fig.S 56 <sup>13</sup>C NMR of compound 3da

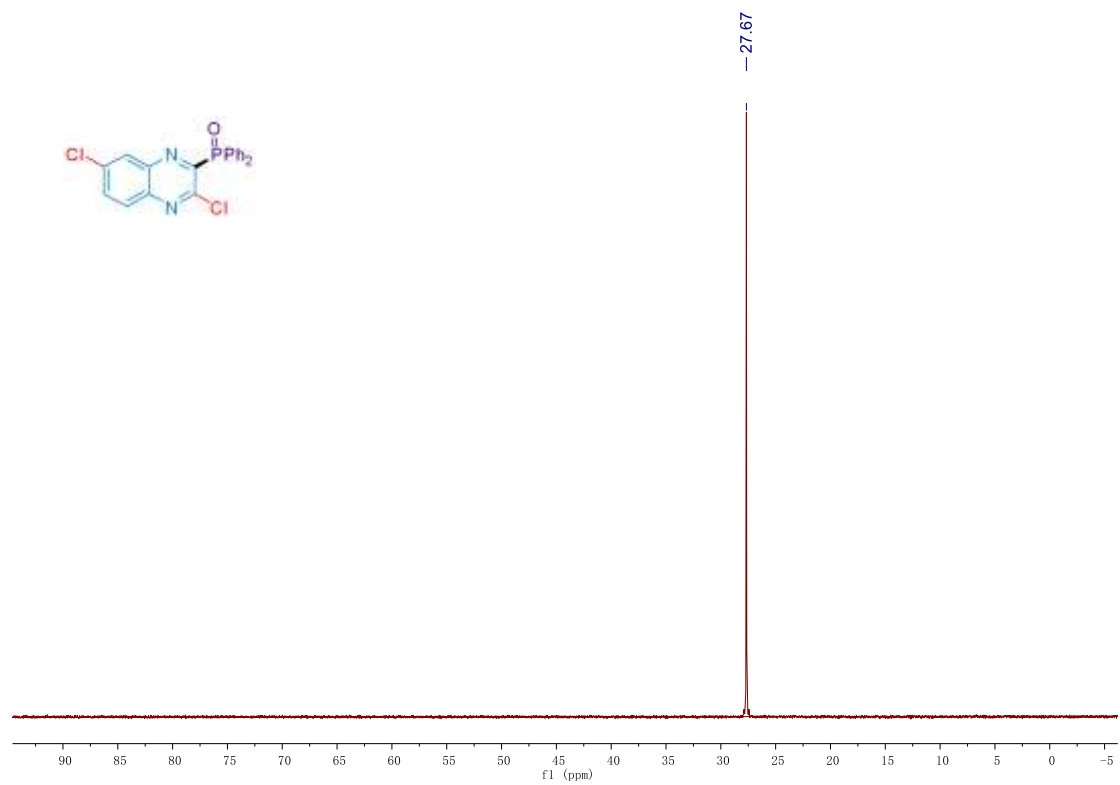

Fig.S 57 <sup>31</sup>P NMR of compound 3da

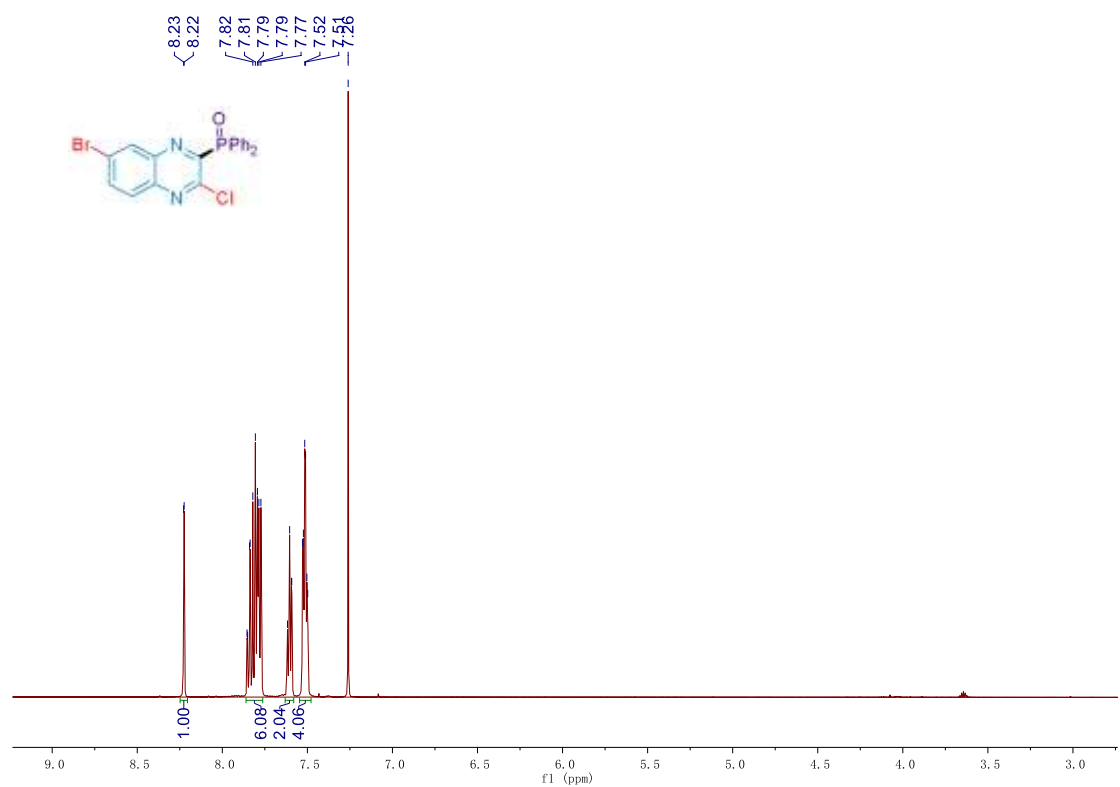

Fig.S 58 <sup>1</sup>H NMR of compound 3ea



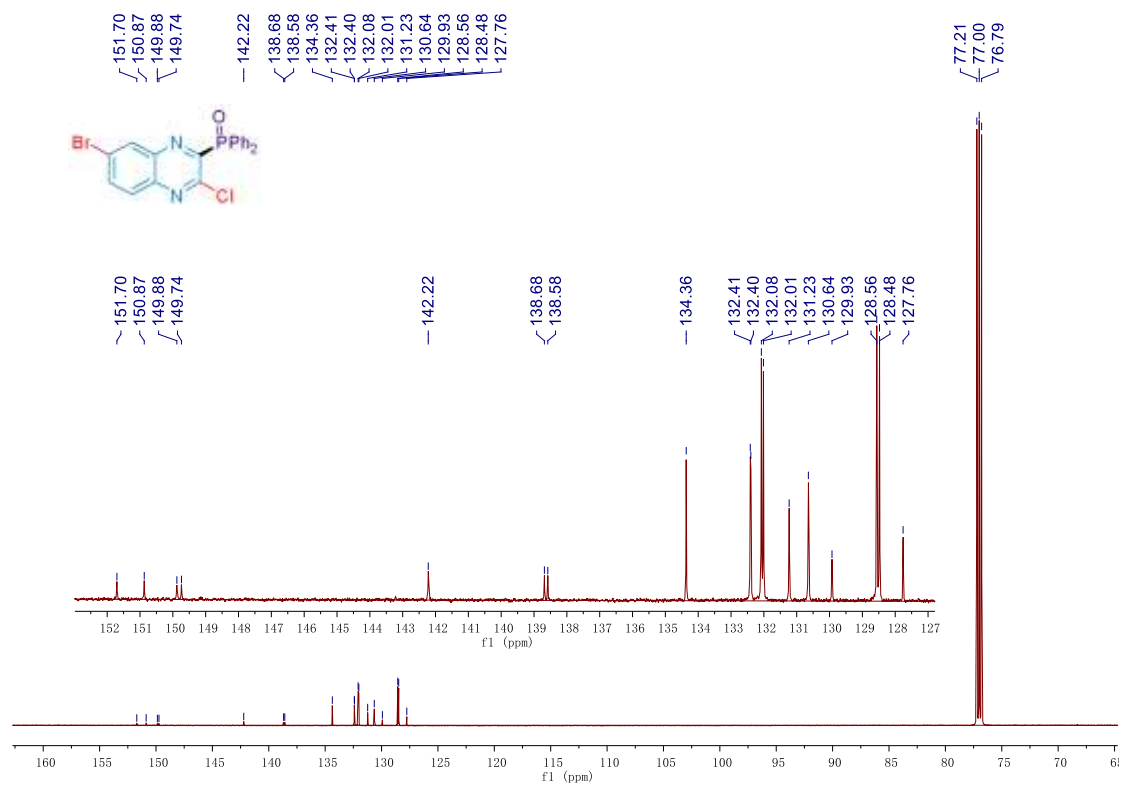

Fig.S 59  $^{13}\text{C}$  NMR of compound 3ea

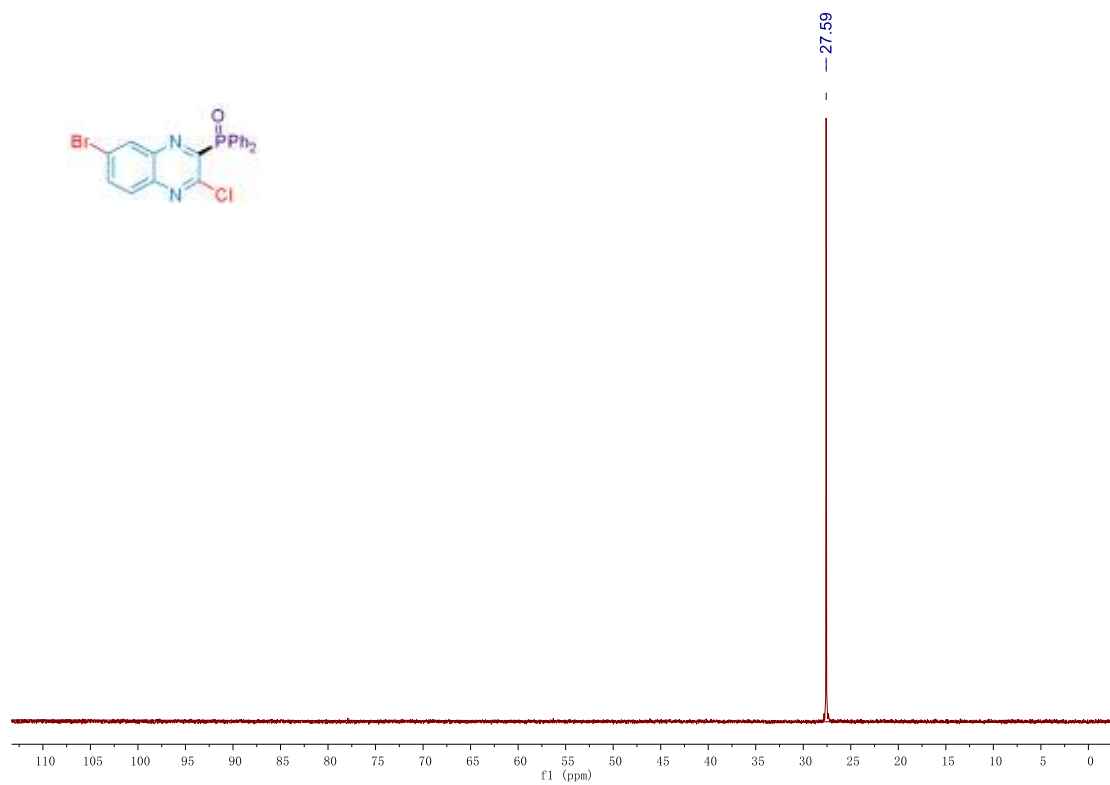

Fig.S 60  $^{31}\text{P}$  NMR of compound 3ea

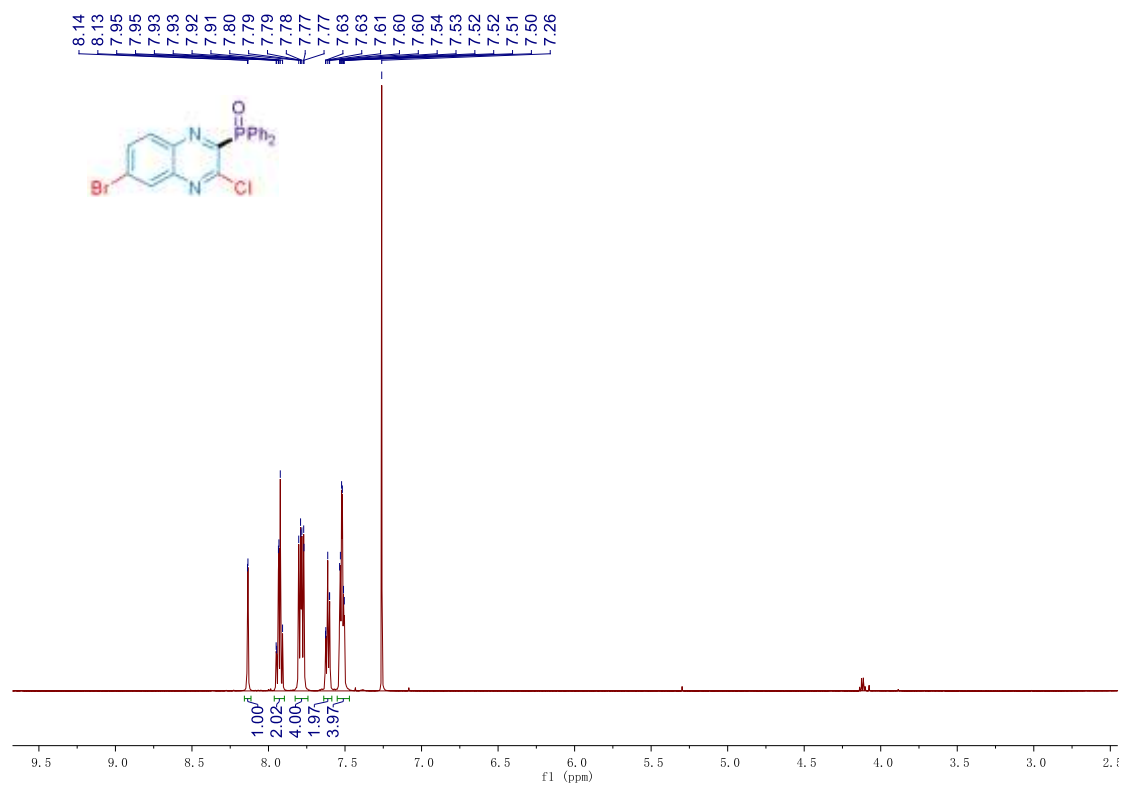

Fig.S 61 <sup>1</sup>H NMR of compound 3fa

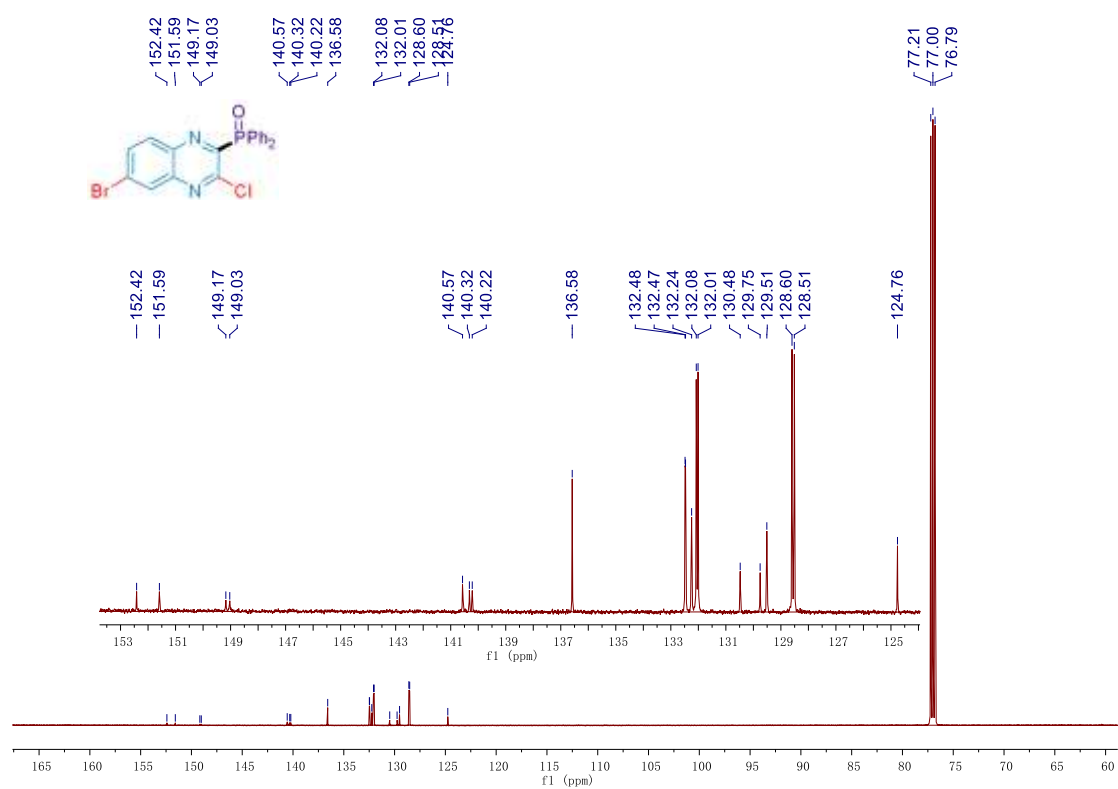

Fig.S 62 <sup>13</sup>C NMR of compound 3fa

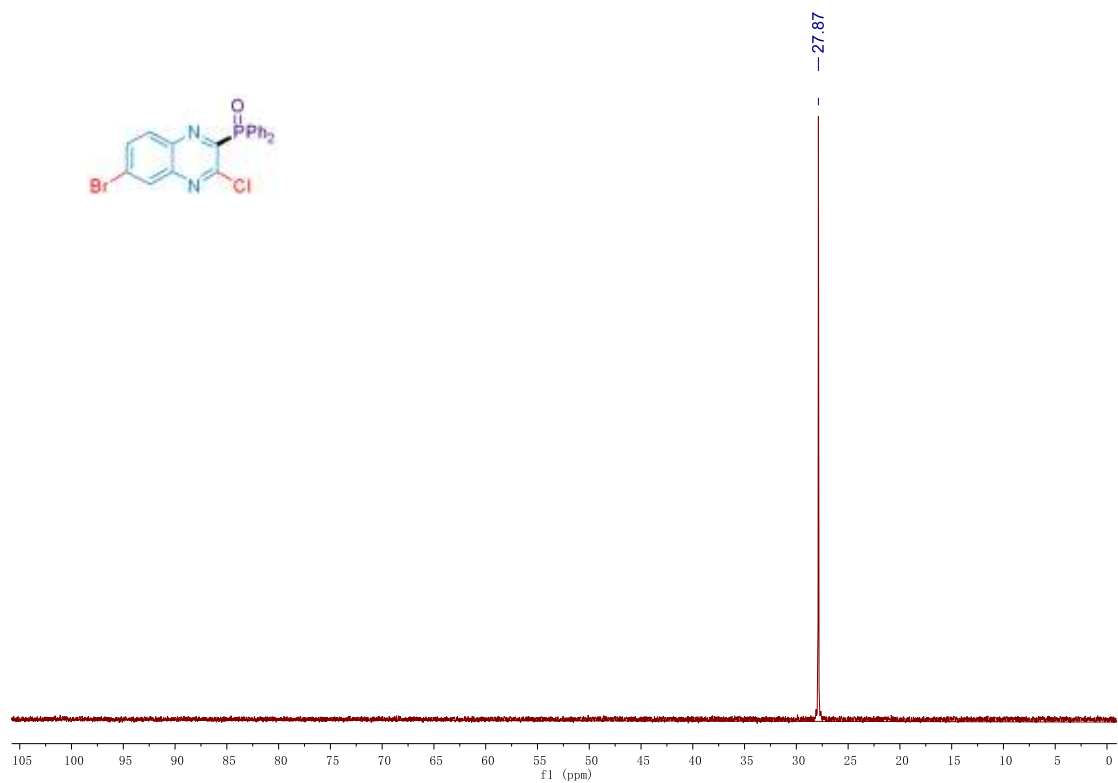

Fig.S 63  $^{31}\text{P}$  NMR of compound 3fa

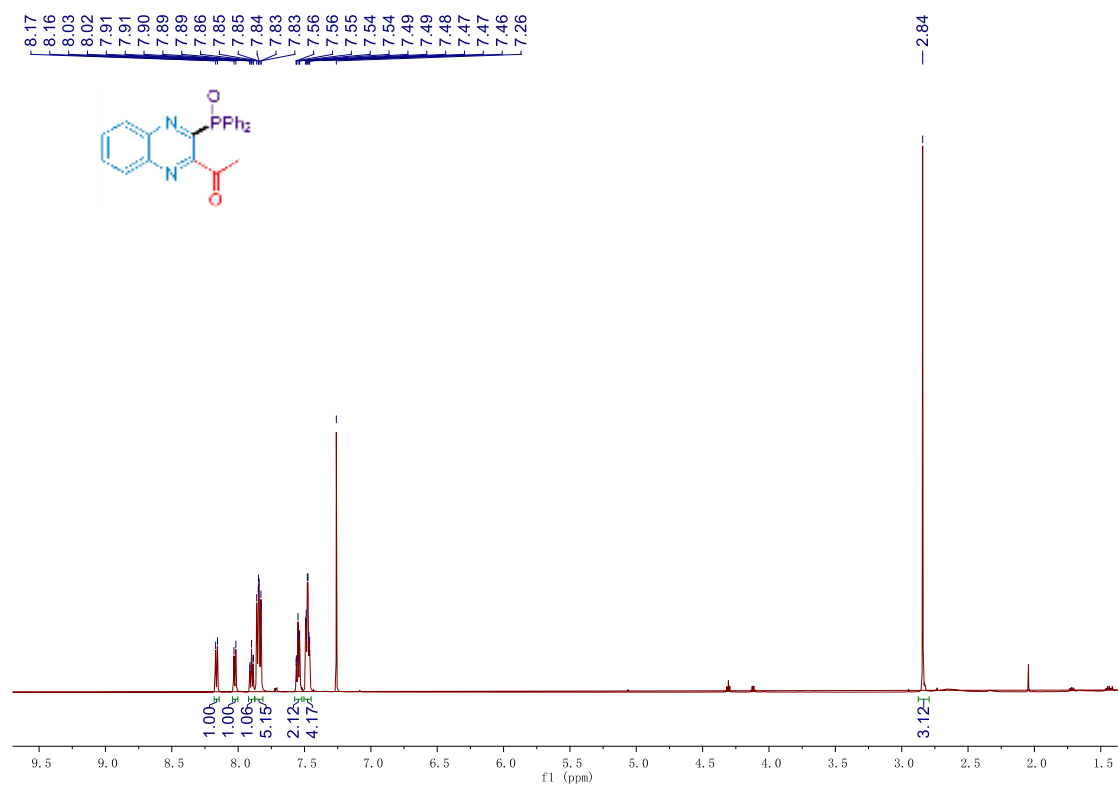

Fig.S 64  $^1\text{H}$  NMR of compound 3ga

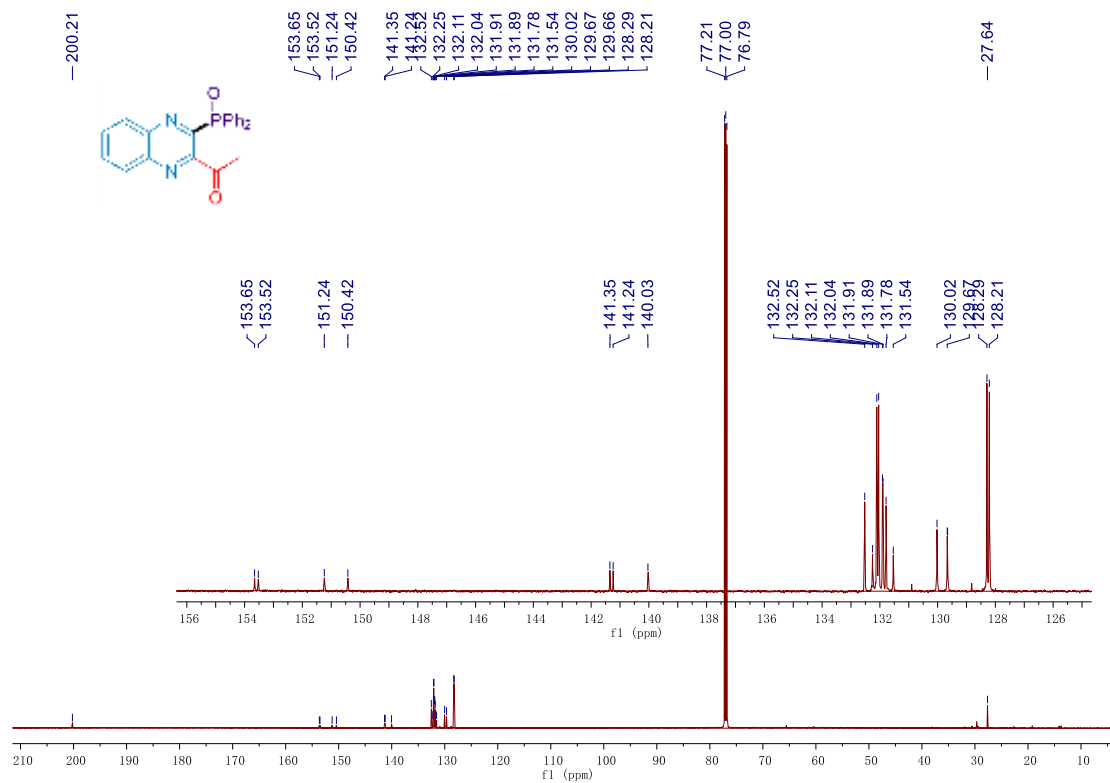

Fig.S 65  $^{13}\text{C}$  NMR of compound 3ga

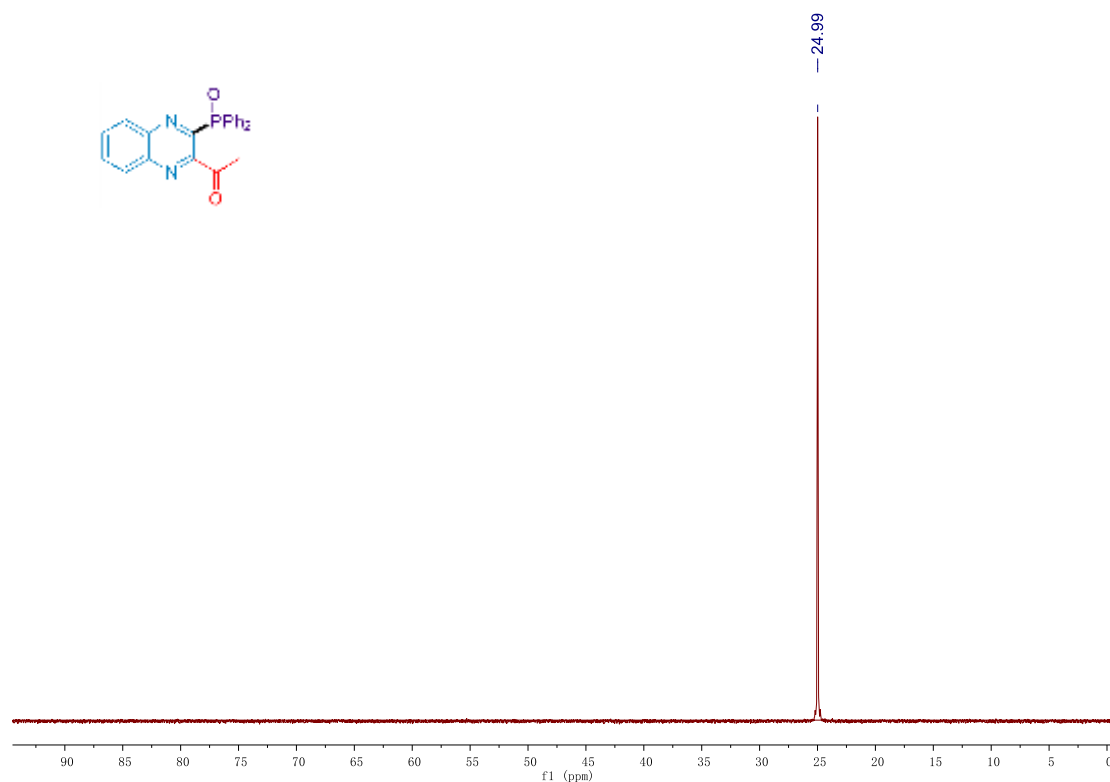

Fig.S 66  $^{31}\text{P}$  NMR of compound 3ga

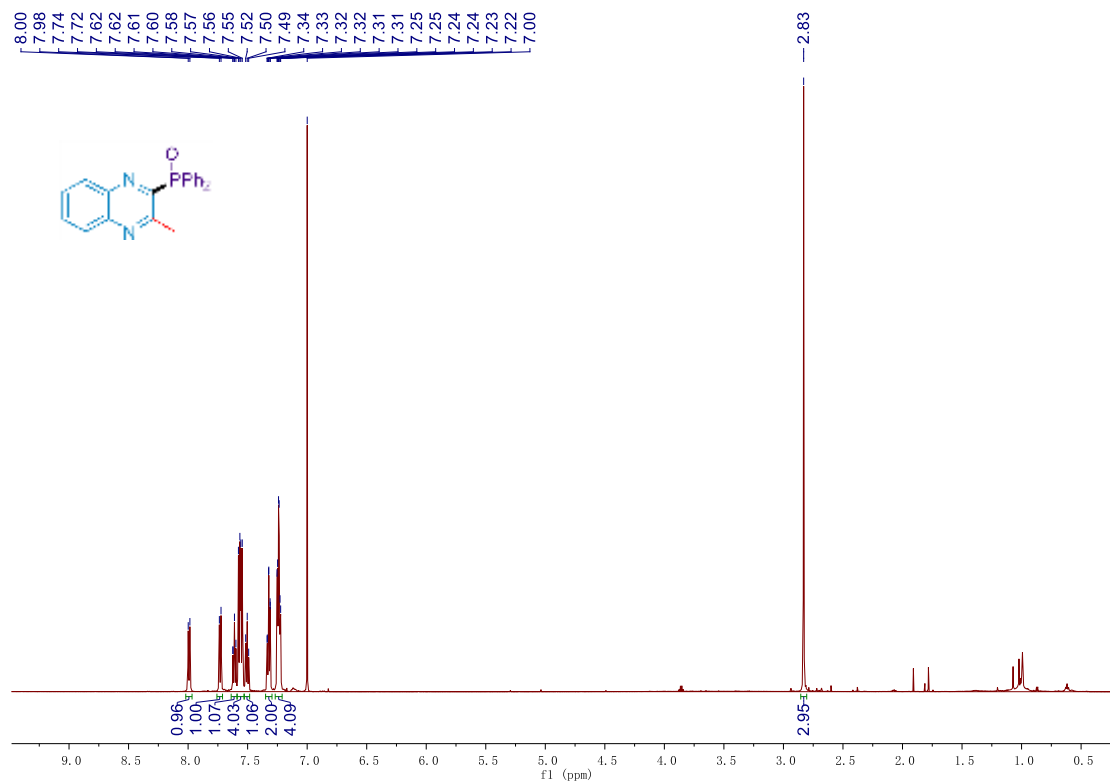

Fig.S 67  $^1\text{H}$  NMR of compound 3ha

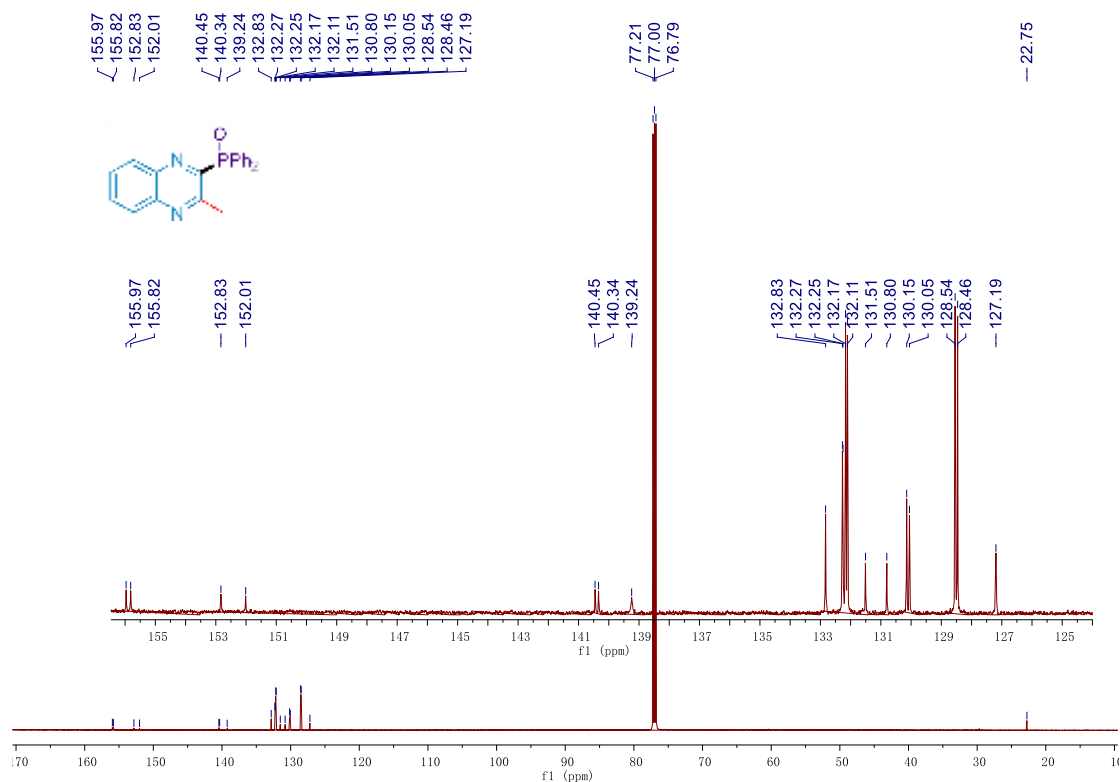

Fig.S 68  $^{13}\text{C}$  NMR of compound 3ha

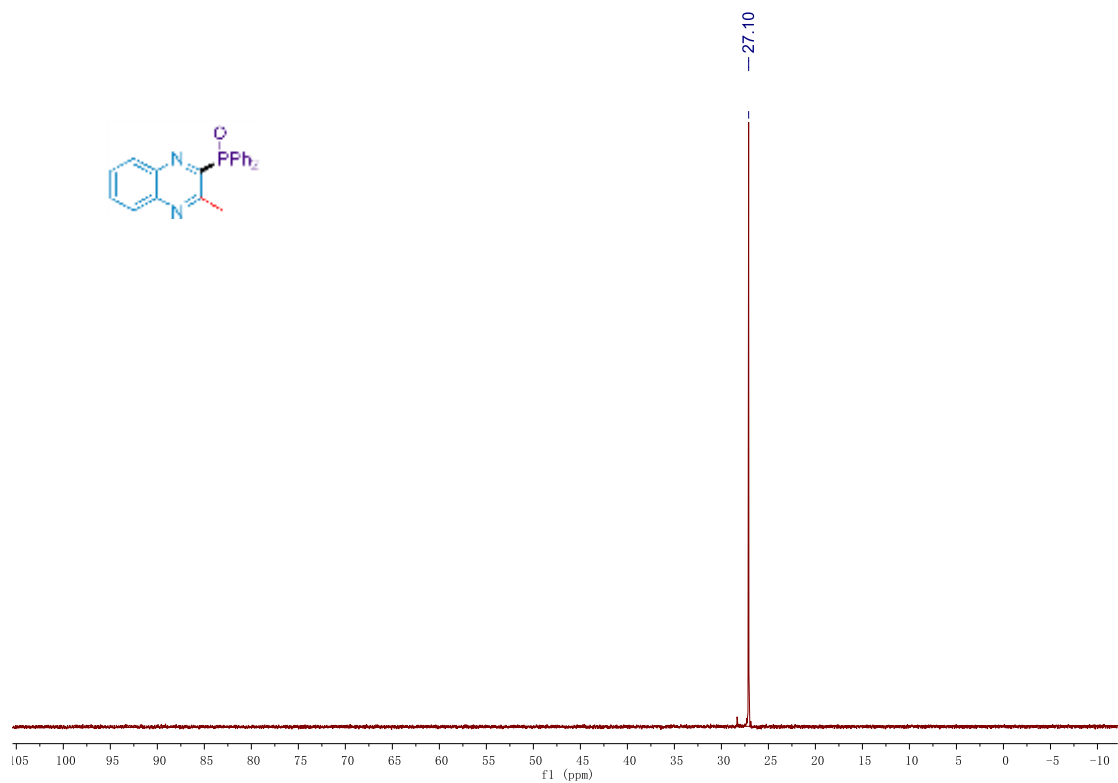

Fig.S 69  $^{31}\text{P}$  NMR of compound 3ha

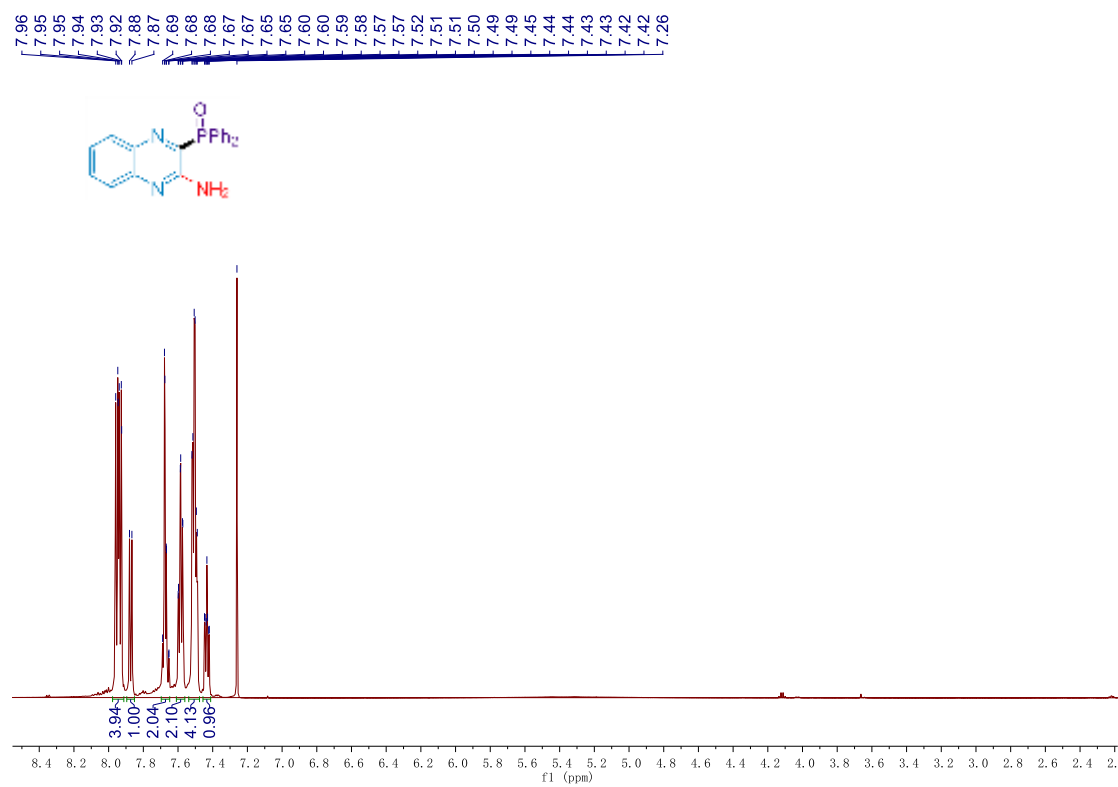

Fig.S 70  $^1\text{H}$  NMR of compound 3ia

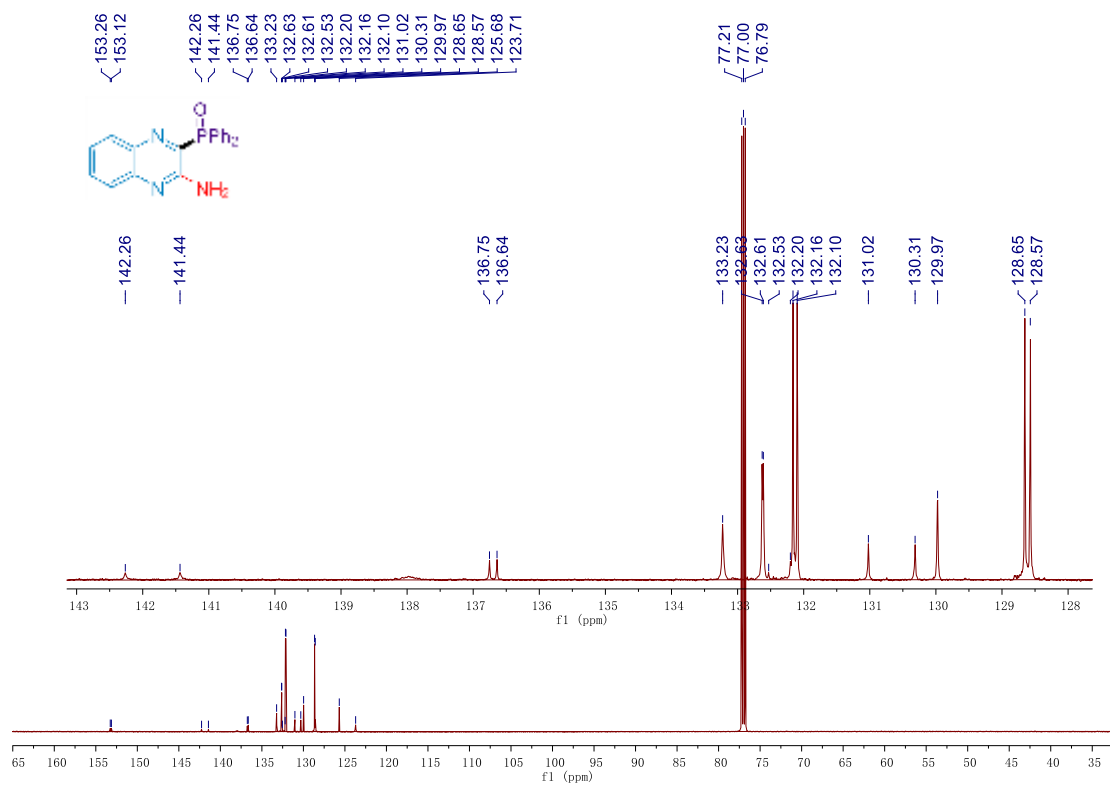

Fig.S 71 <sup>13</sup>C NMR of compound 3ia

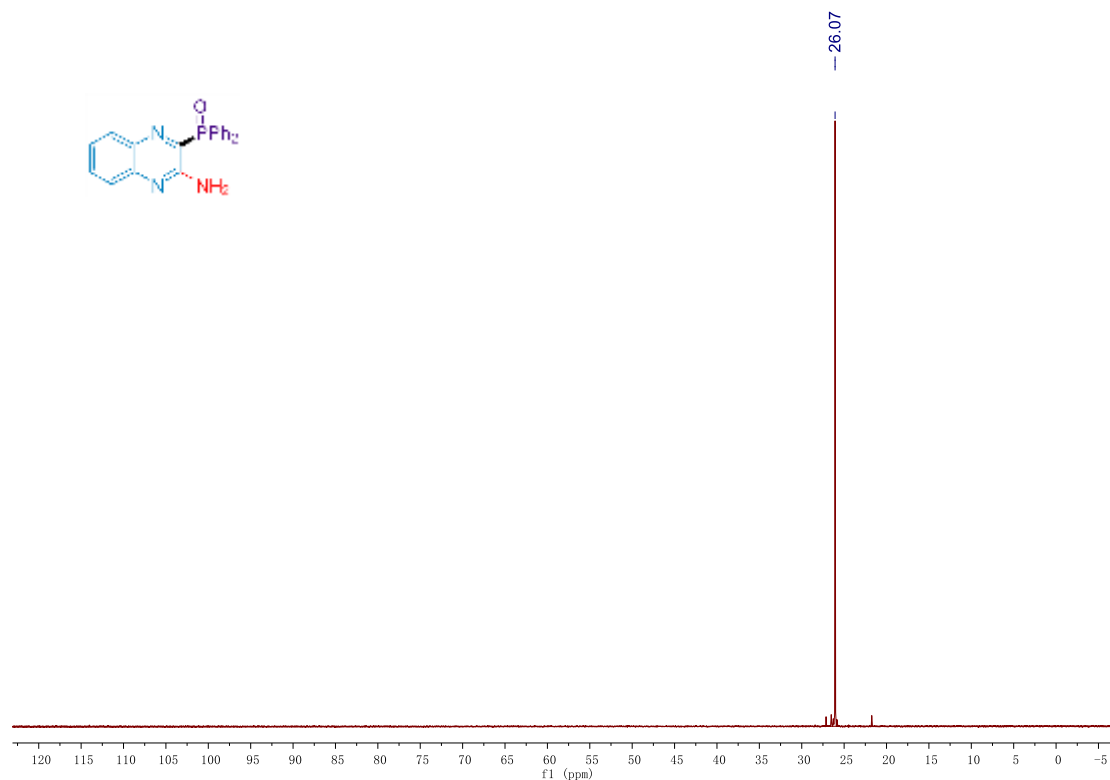

Fig.S 72 <sup>31</sup>P NMR of compound 3ia

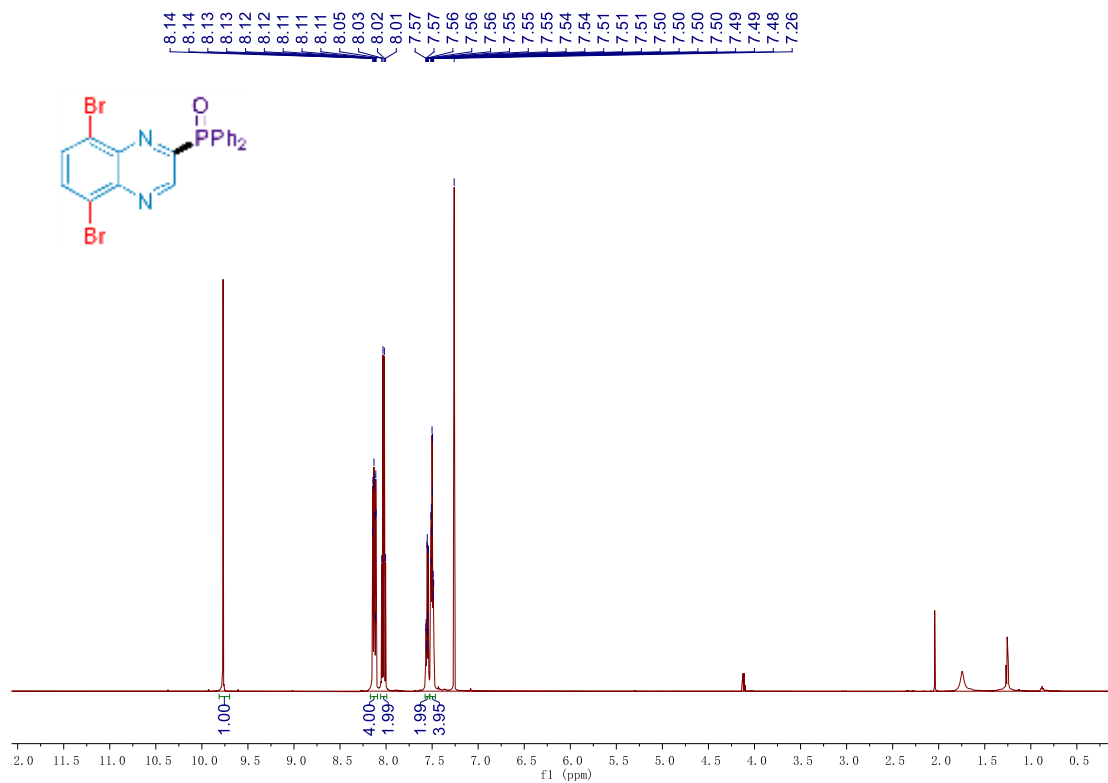

Fig.S 73  $^1\text{H}$  NMR of compound 3ja

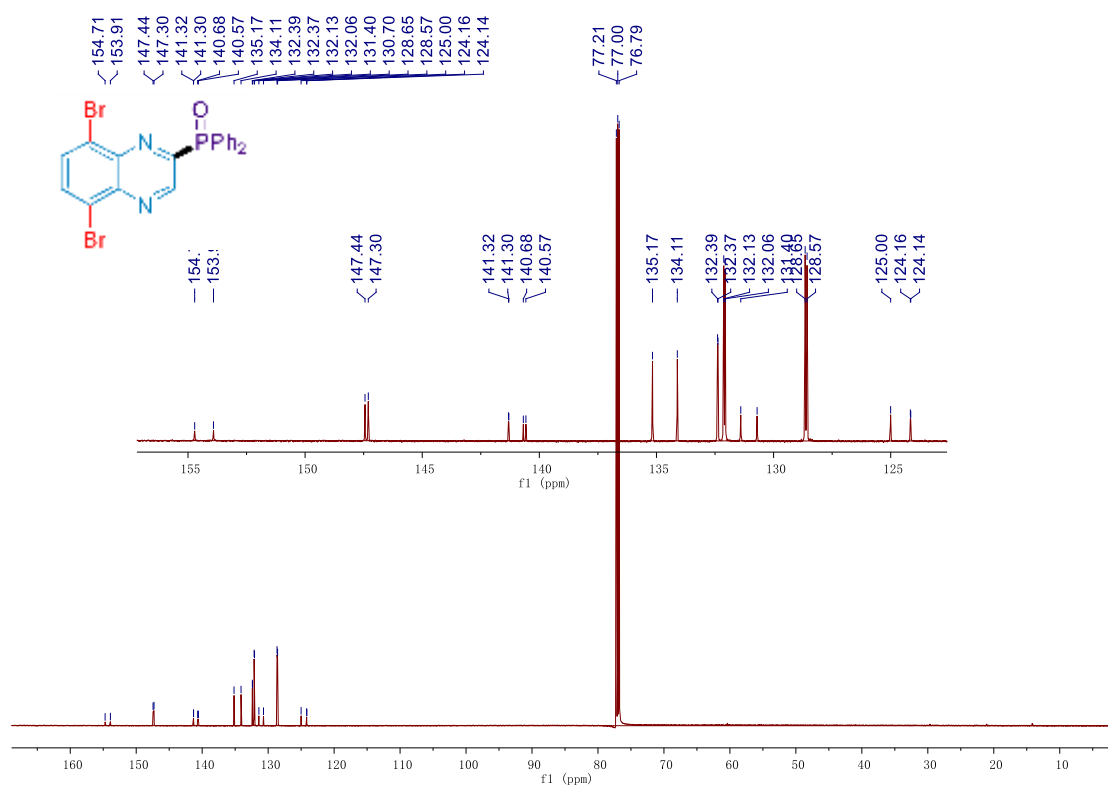

Fig.S 74  $^{13}\text{C}$  NMR of compound 3ja



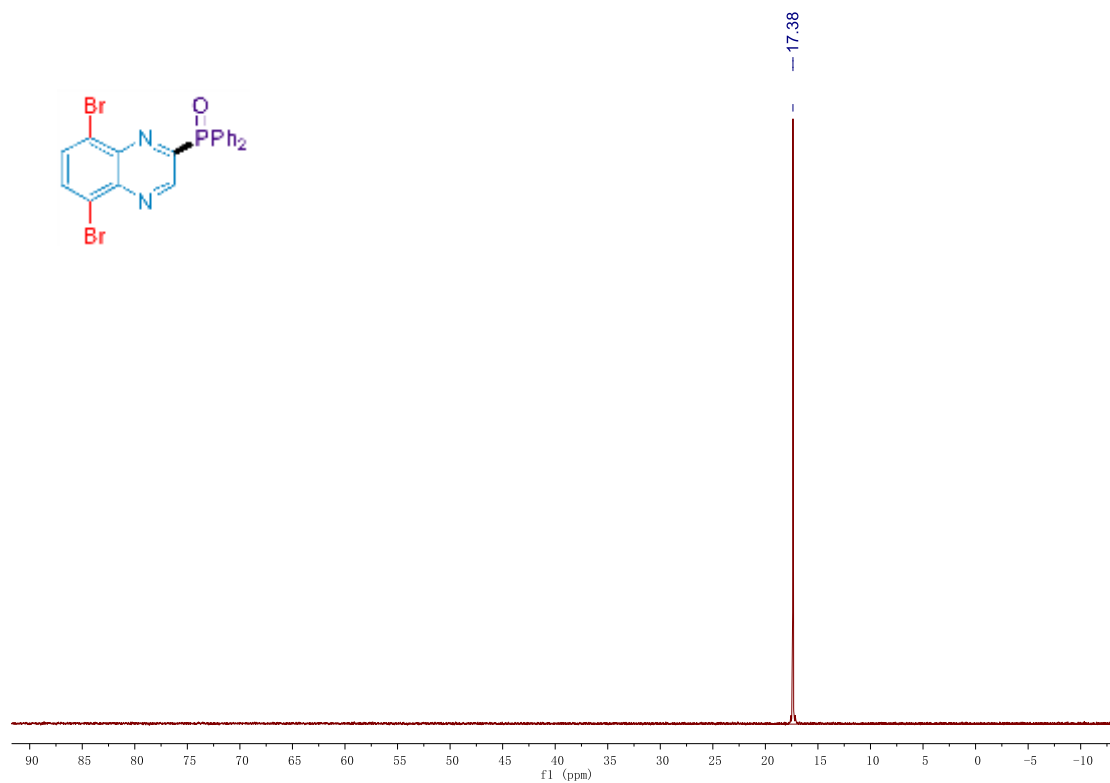

Fig.S 75  $^{31}\text{P}$  NMR of compound 3ja

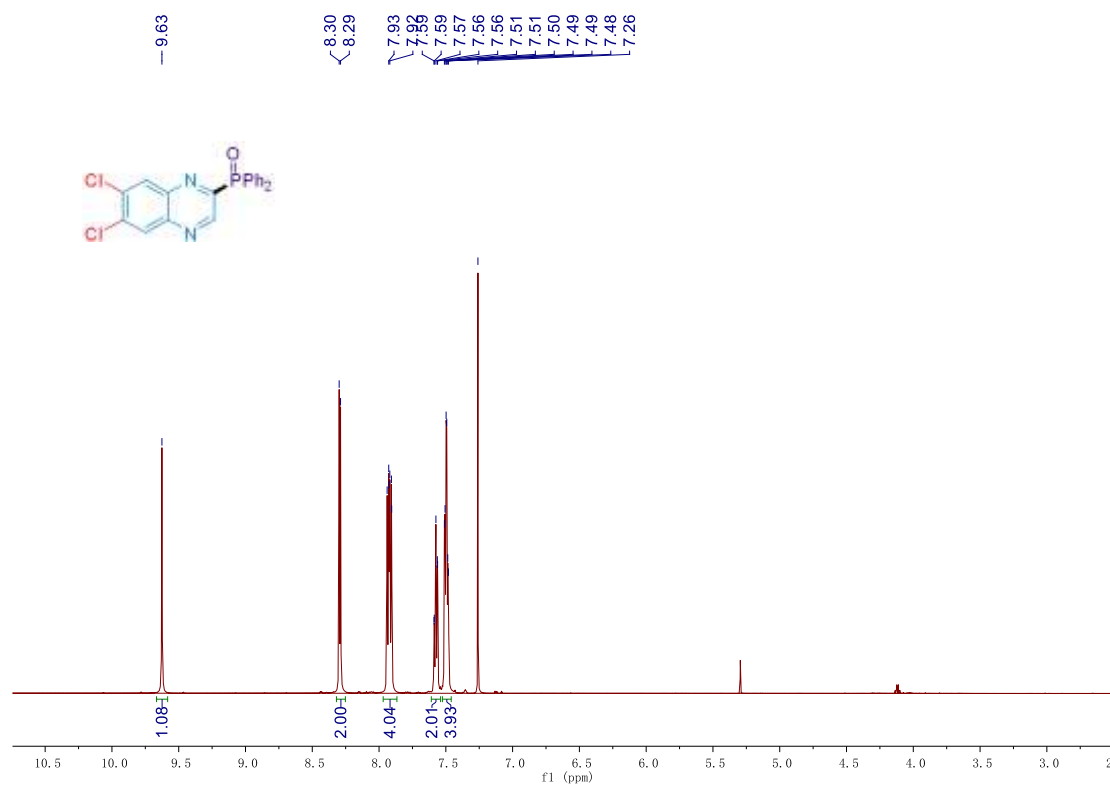

Fig.S 76  $^1\text{H}$  NMR of compound 3ka

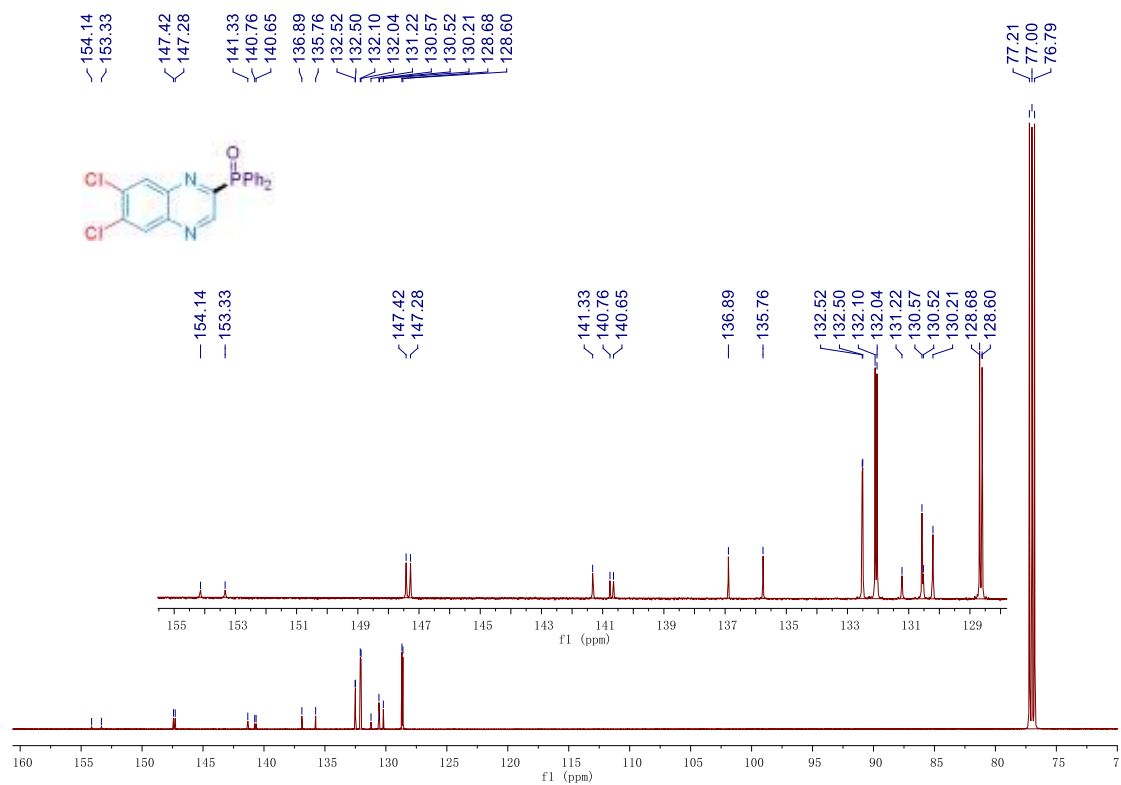

Fig.S 77 <sup>13</sup>C NMR of compound 3ka

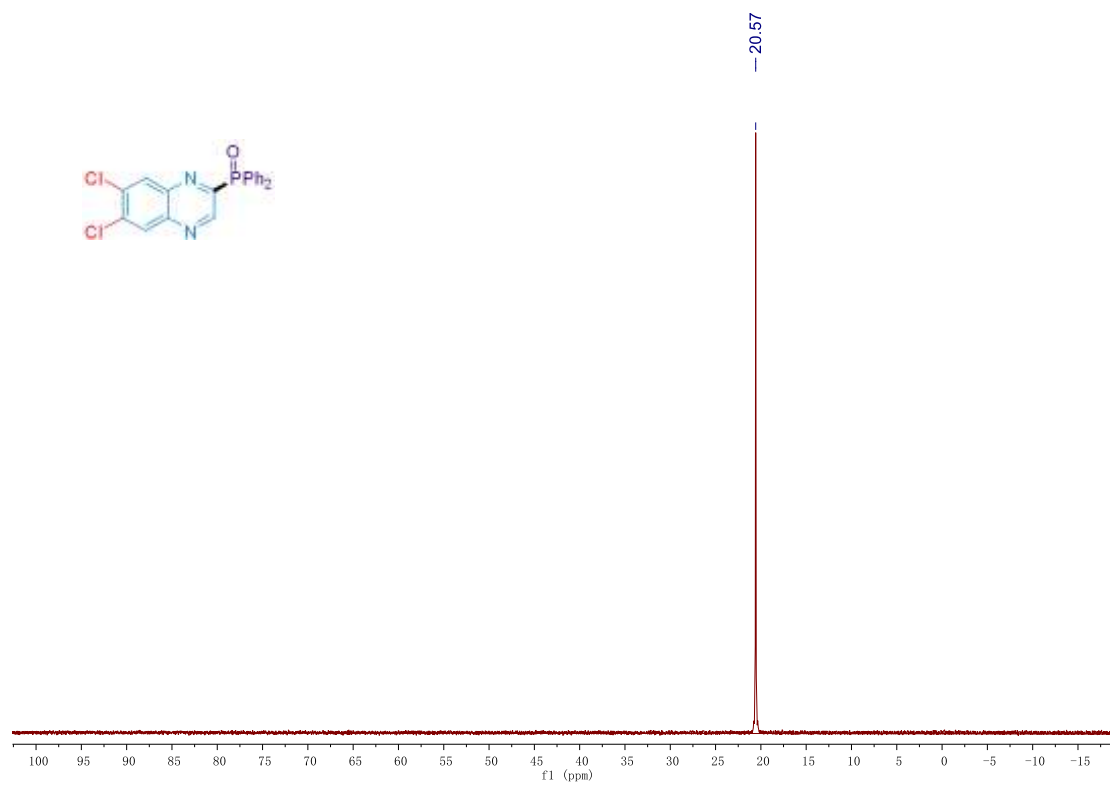

Fig.S 78 <sup>31</sup>P NMR of compound 3ka

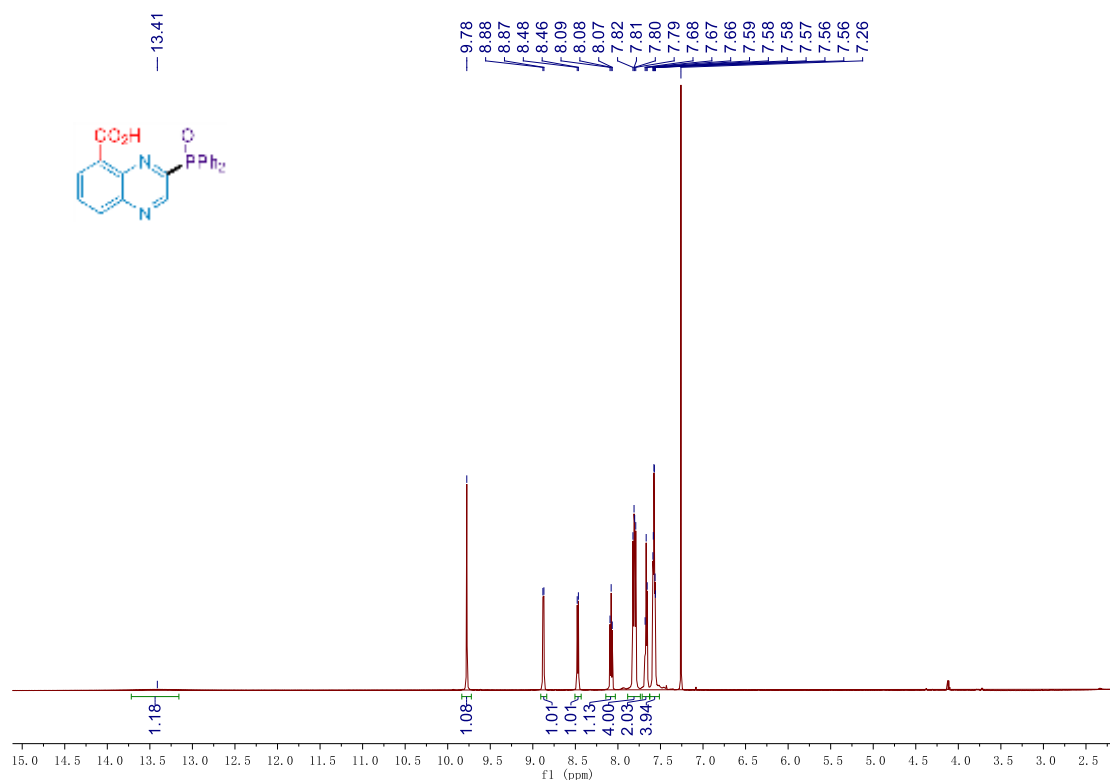

Fig.S 79 <sup>1</sup>H NMR of compound 3la-1

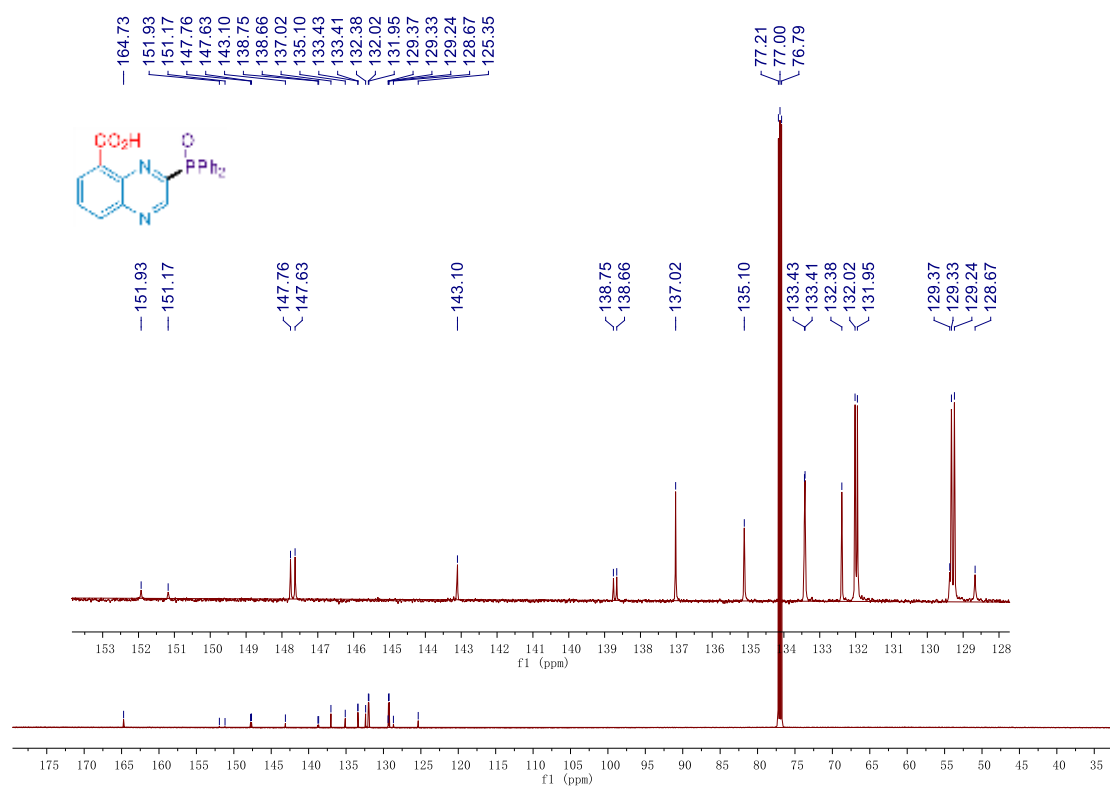

Fig.S 80 <sup>13</sup>C NMR of compound 3la-1

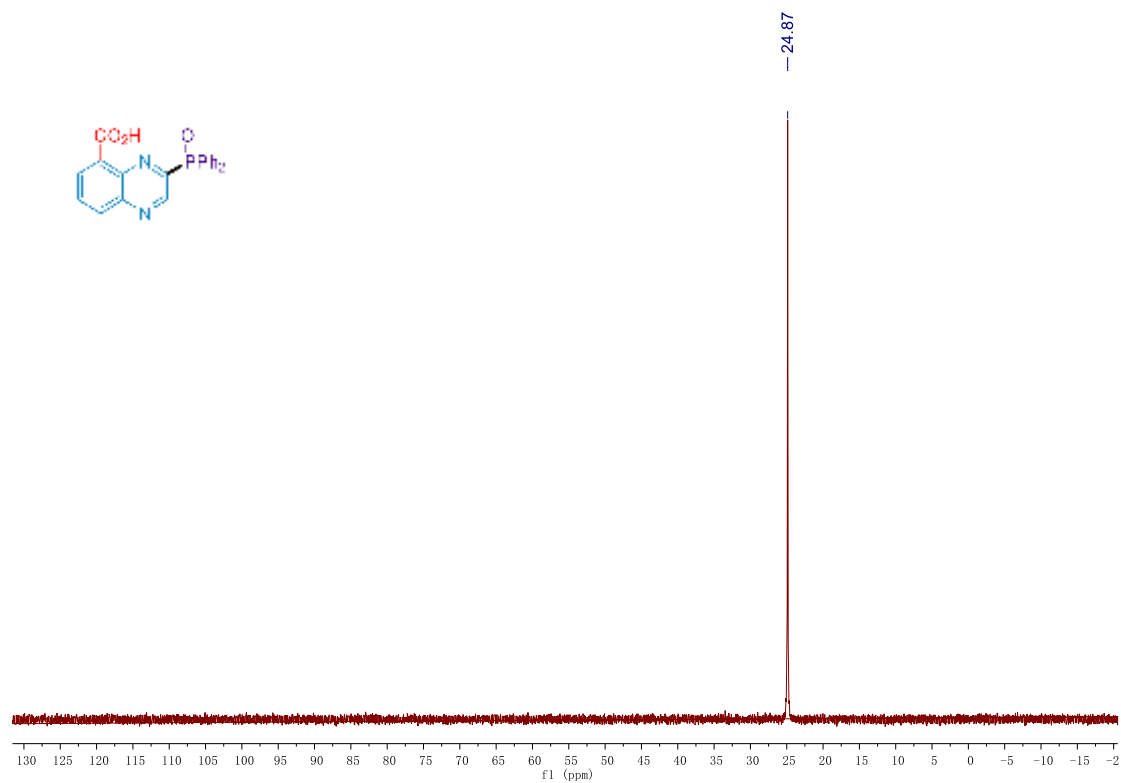

Fig.S 81  $^{31}\text{P}$  NMR of compound 3la-1

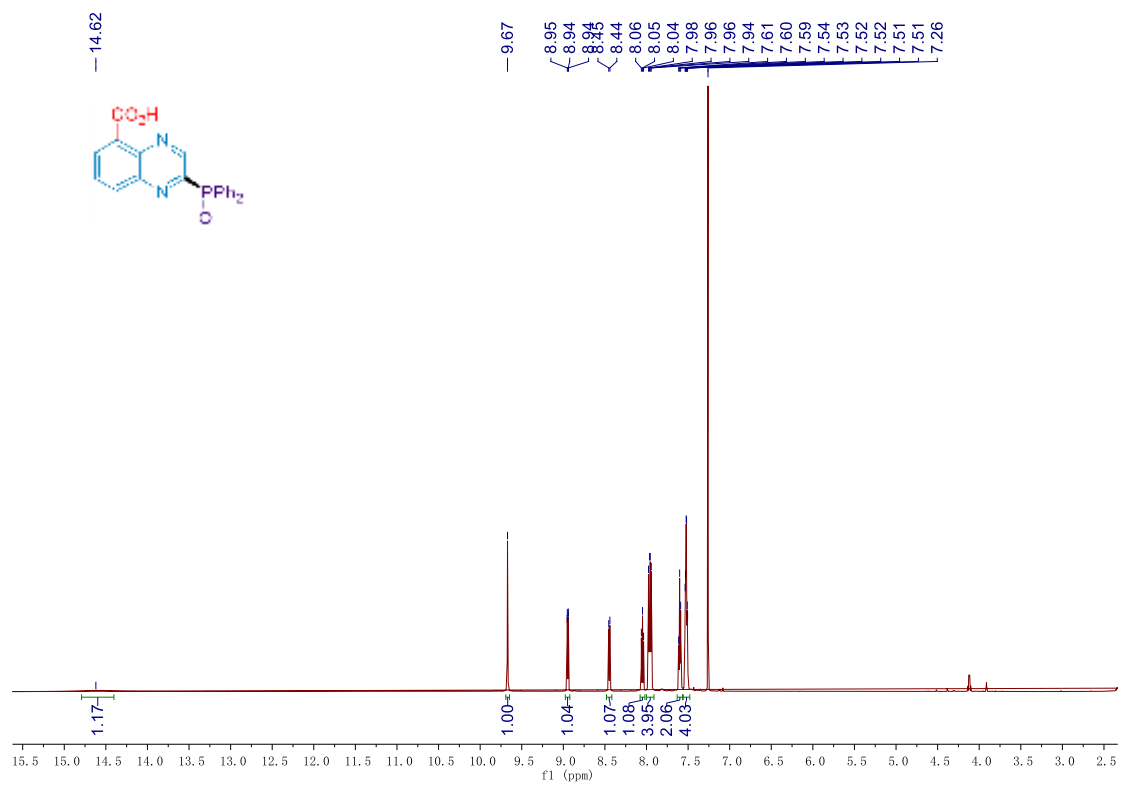

Fig.S 82  $^1\text{H}$  NMR of compound 3la-2

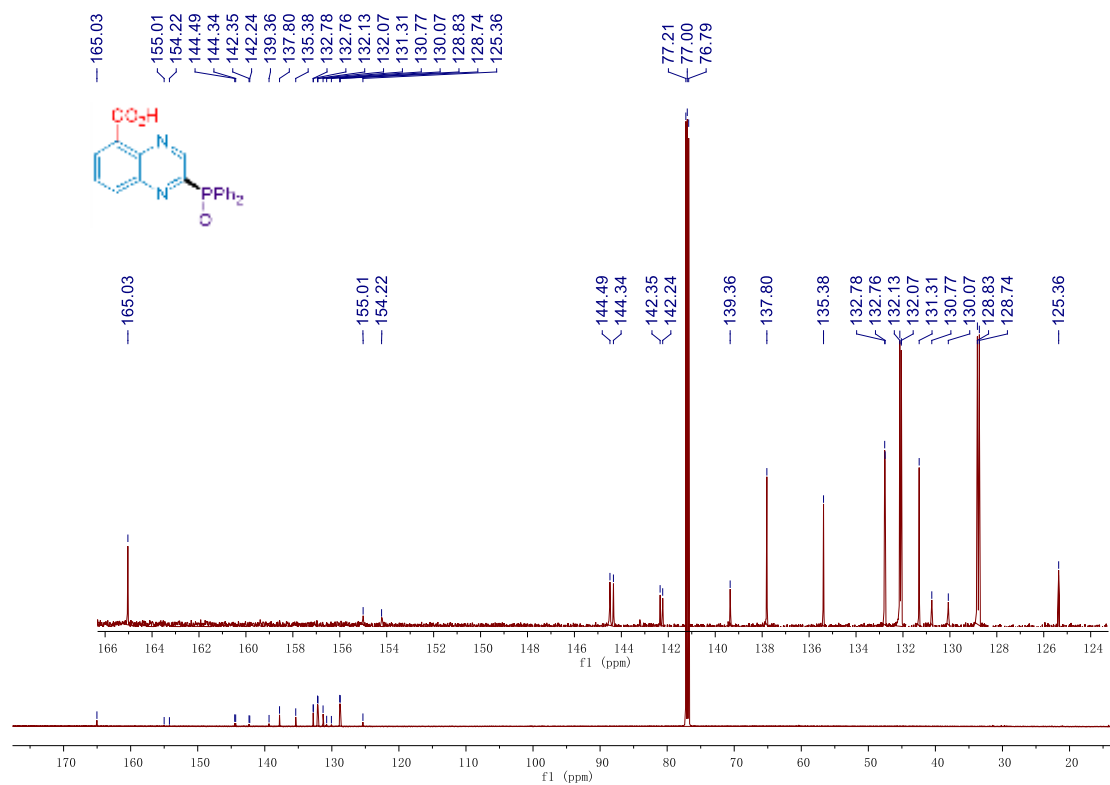

Fig.S 83 <sup>13</sup>C NMR of compound 3Ia-2

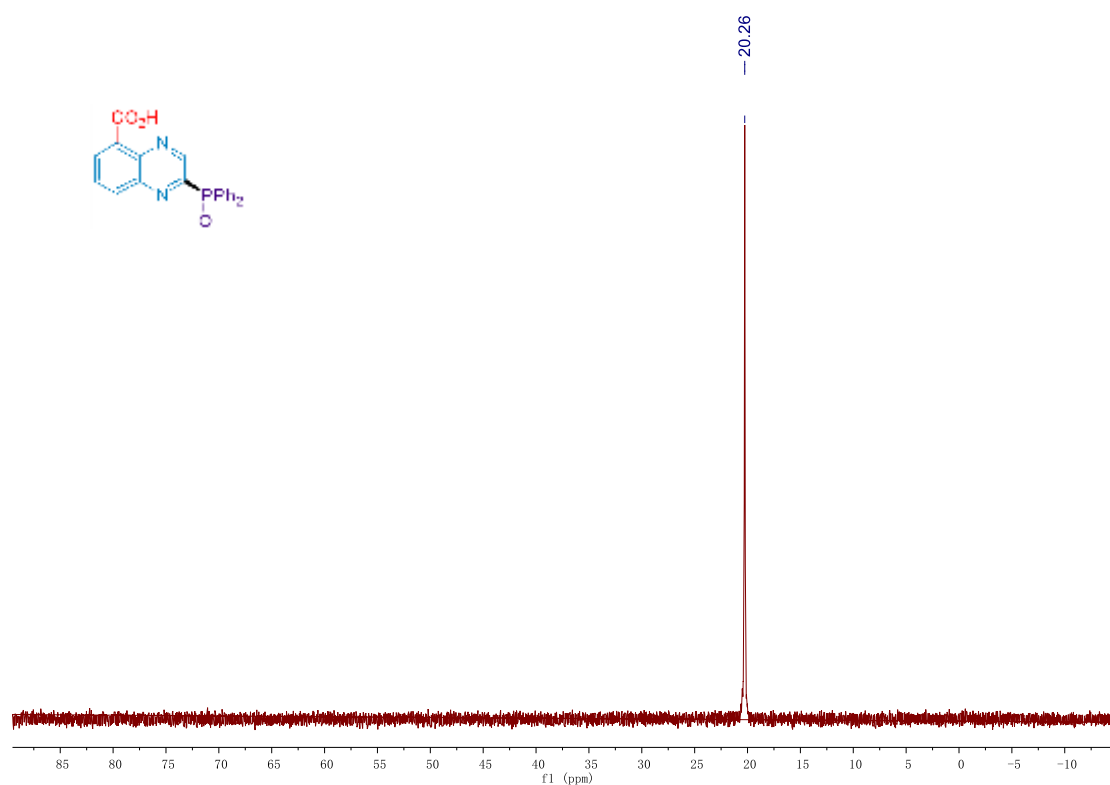

Fig.S 84 <sup>31</sup>P NMR of compound 3Ia-2

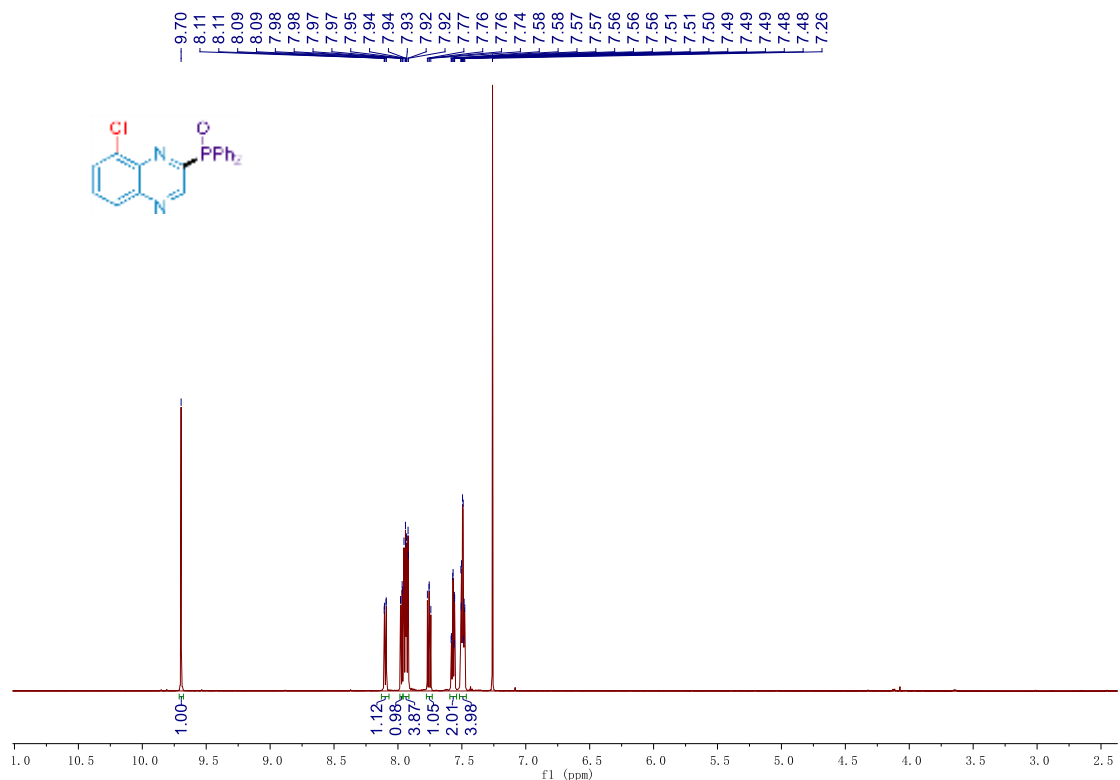

Fig.S 85 <sup>1</sup>H NMR of compound 3ma-1

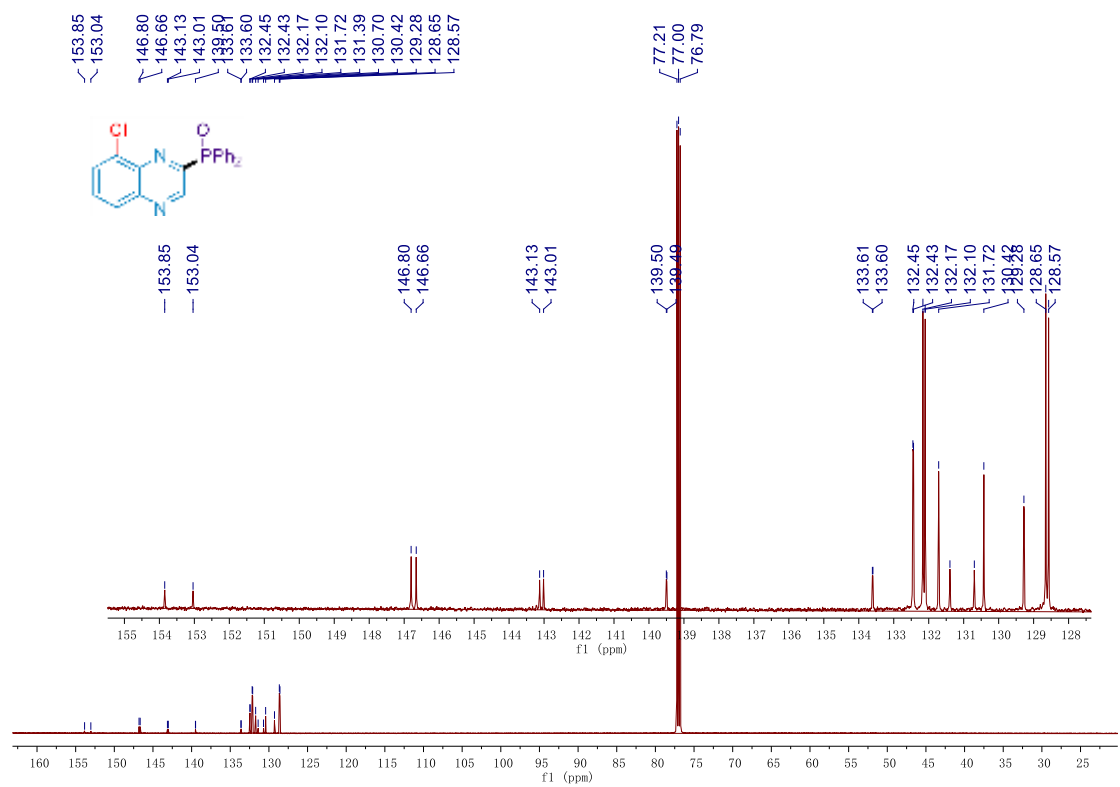

Fig.S 86 <sup>13</sup>C NMR of compound 3ma-1

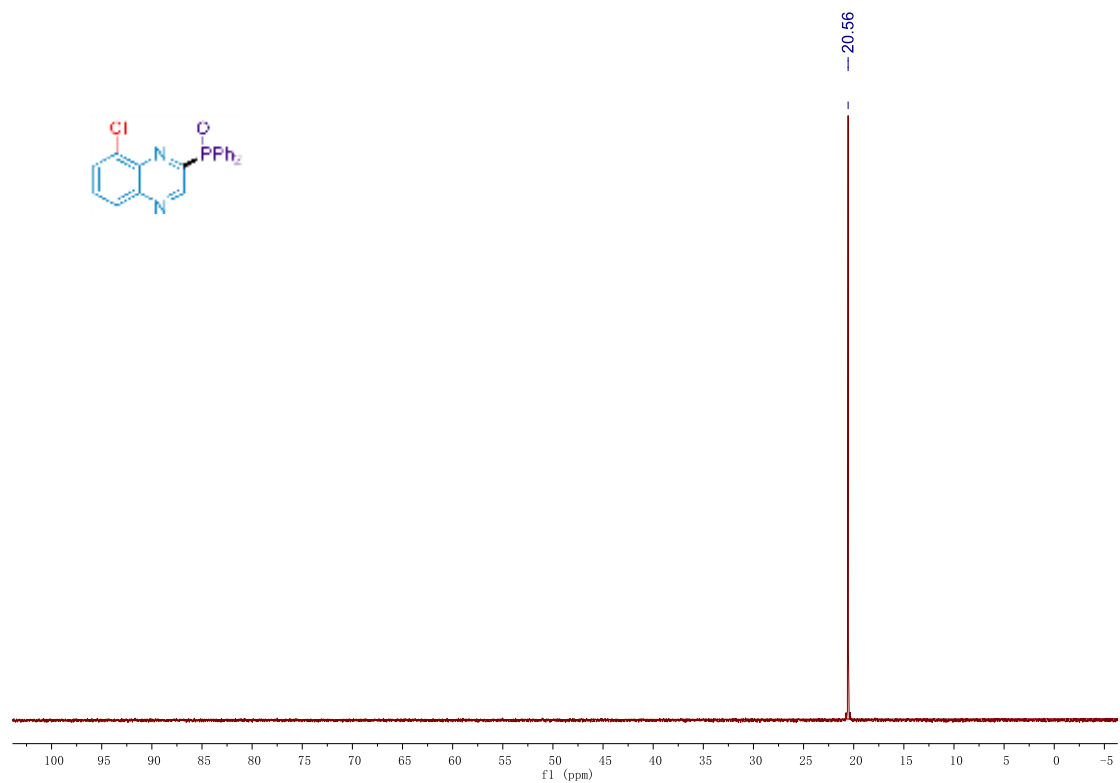

Fig.S 87  $^{31}\text{P}$  NMR of compound 3ma-1

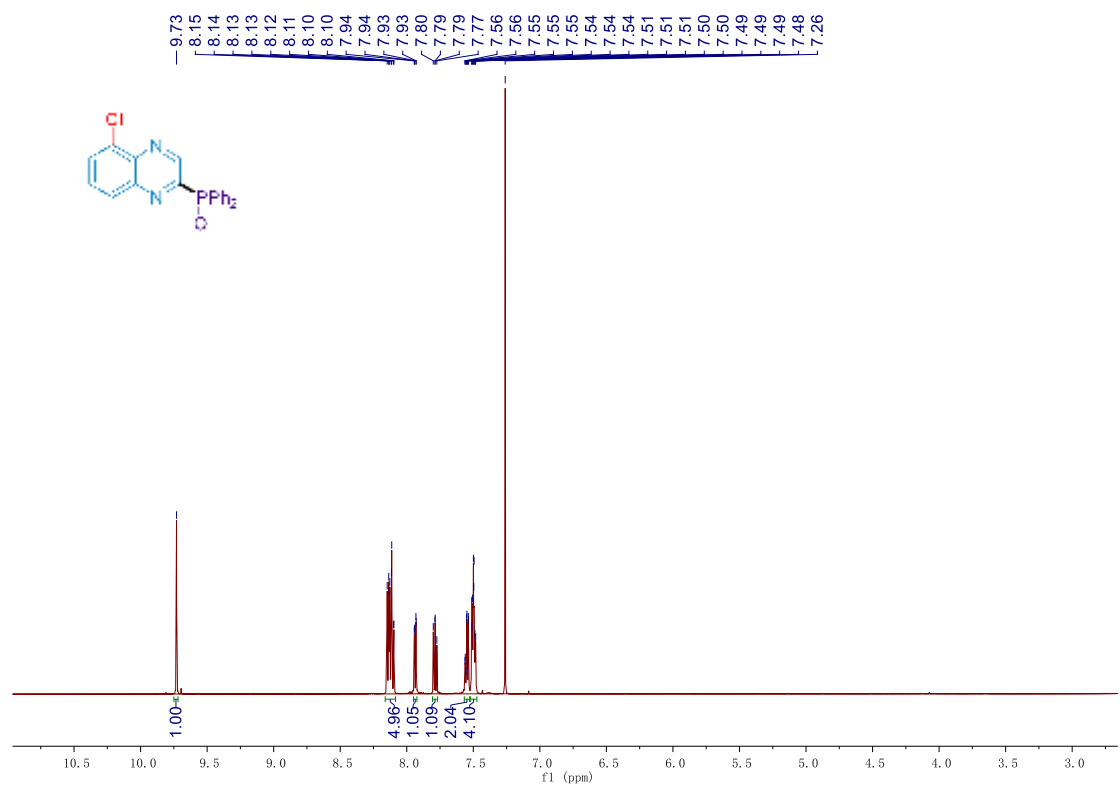

Fig.S 88  $^1\text{H}$  NMR of compound 3ma-2

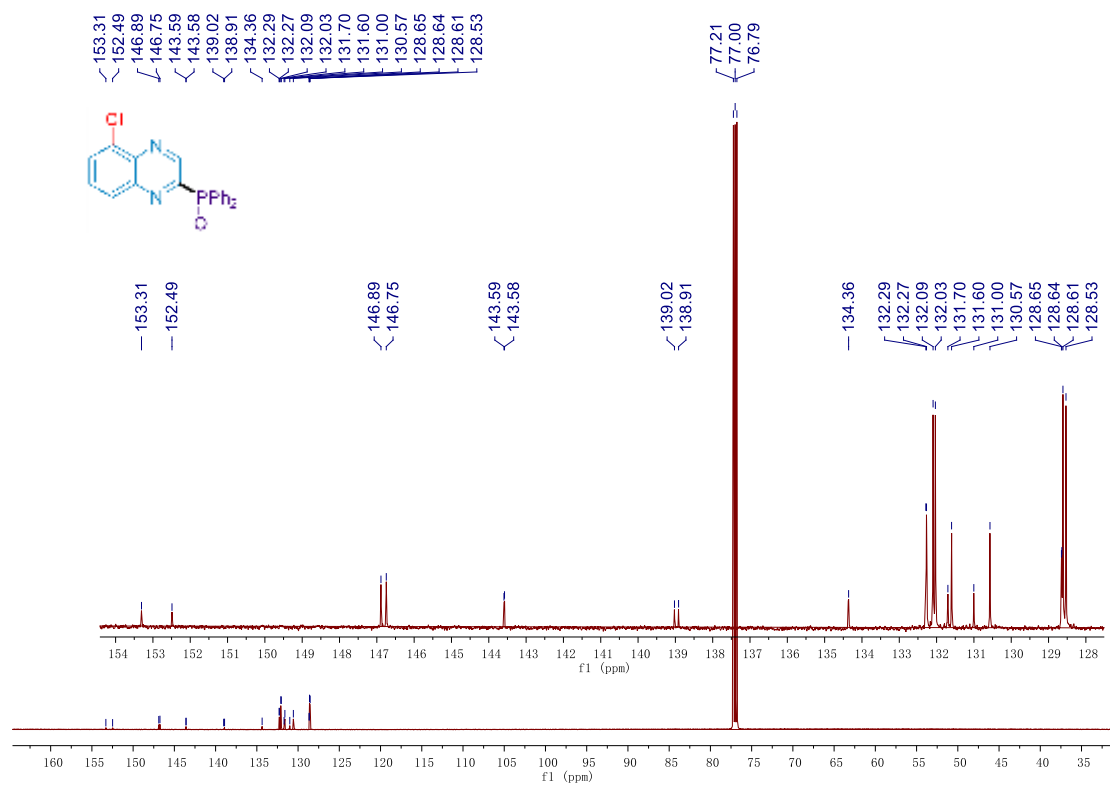

Fig.S 89 <sup>13</sup>C NMR of compound 3ma-2

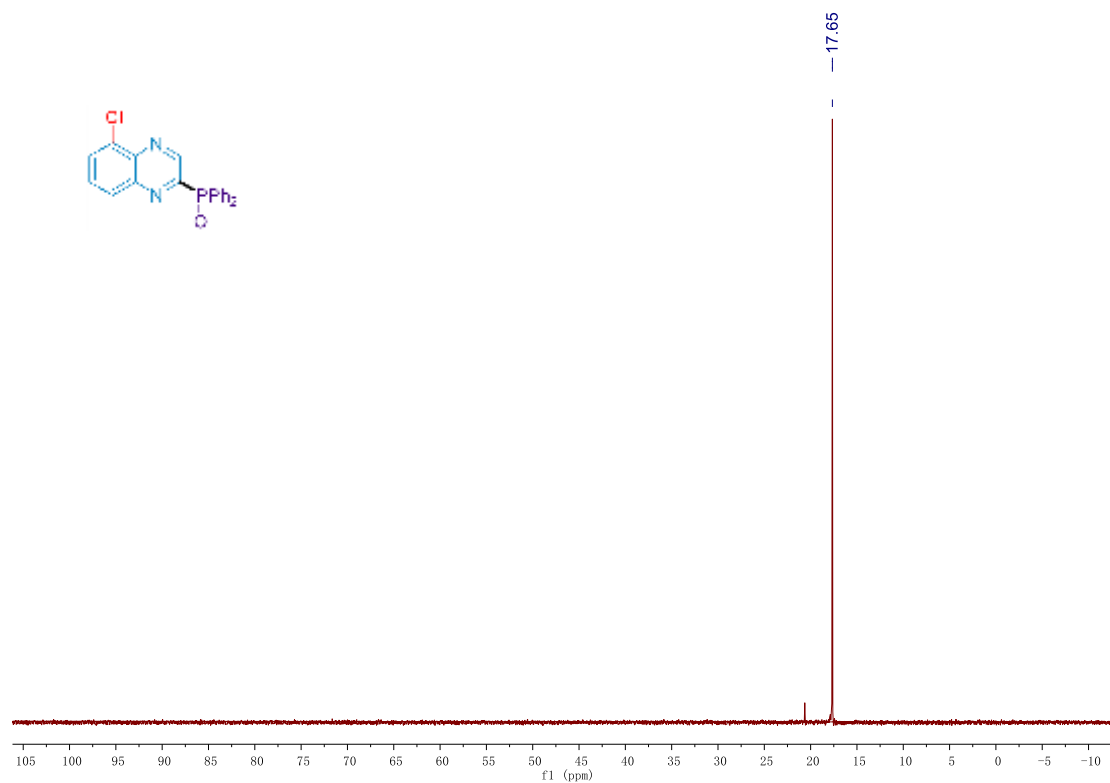

Fig.S 90 <sup>31</sup>P NMR of compound 3ma-2



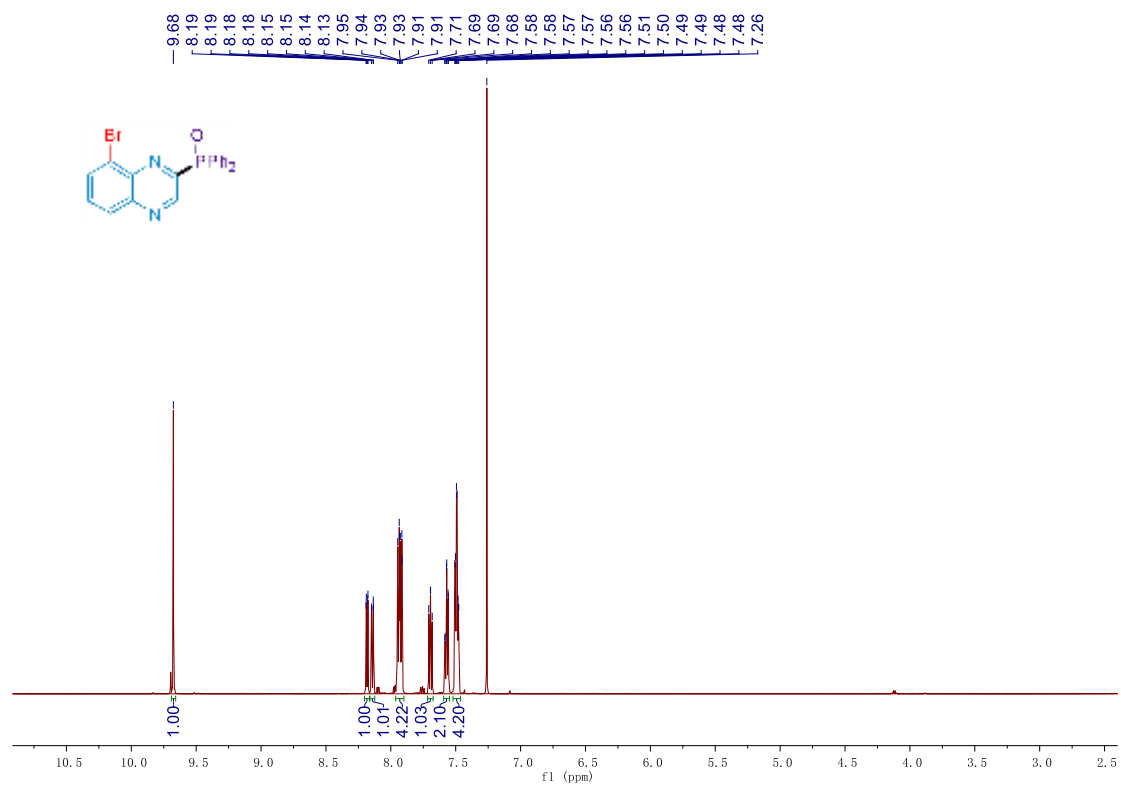

Fig.S 91  $^1\text{H NMR}$  of compound 3na-1

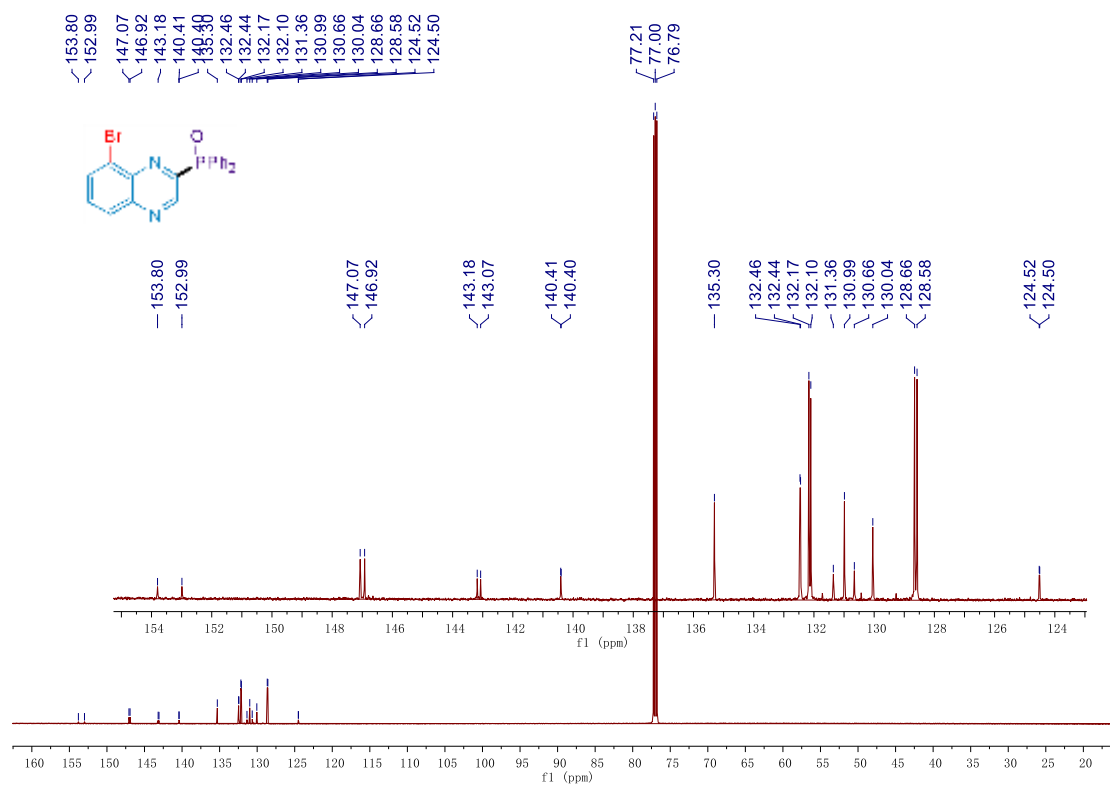

Fig.S 92  $^{13}\text{C NMR}$  of compound 3na-1

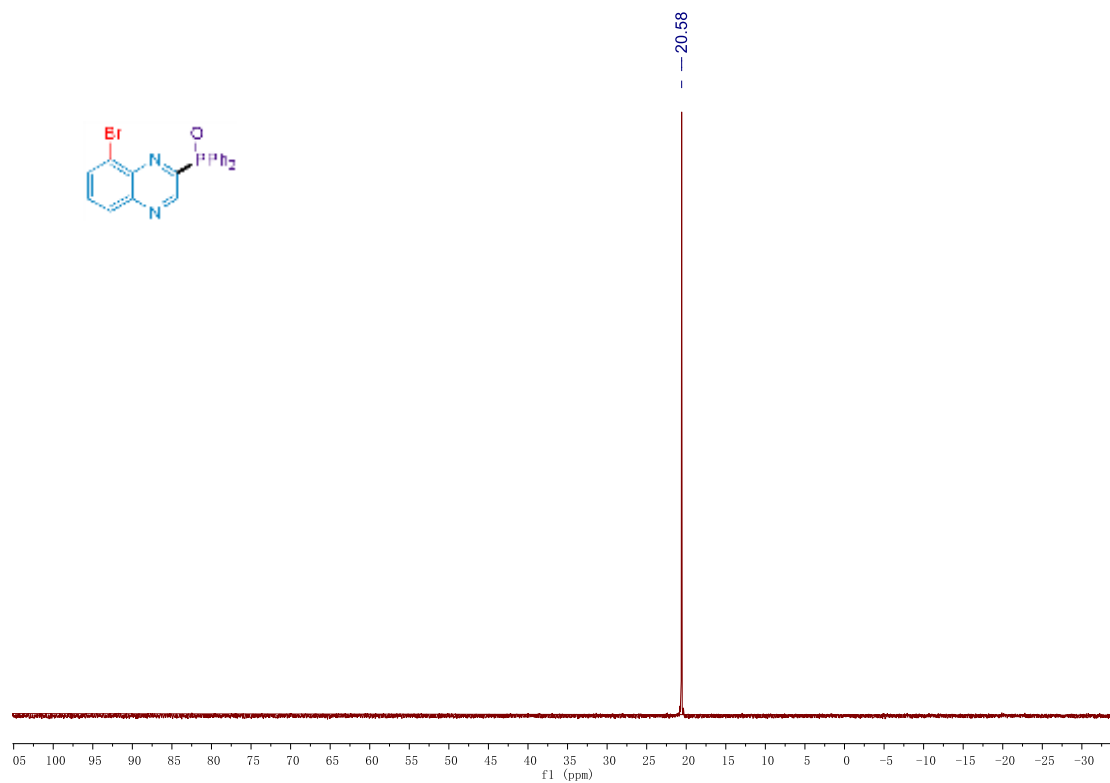

Fig.S 93  $^{31}\text{P}$  NMR of compound 3na-1

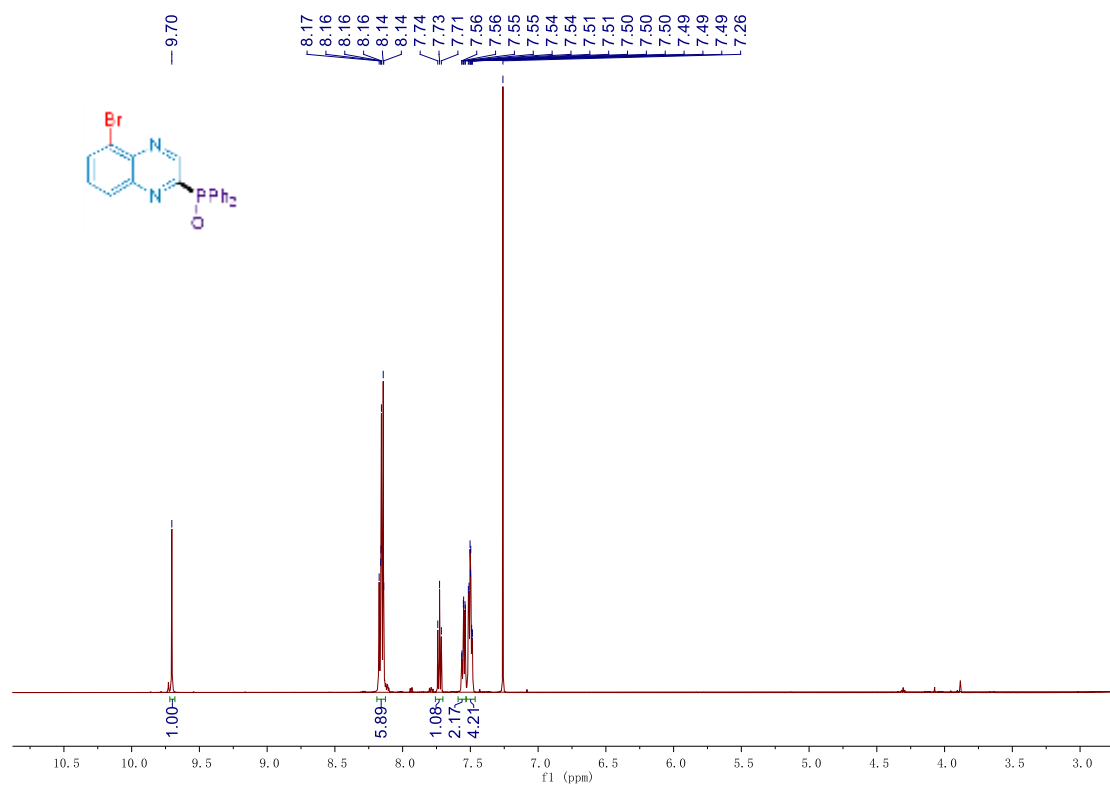

Fig.S 94  $^1\text{H}$  NMR of compound 3na-2

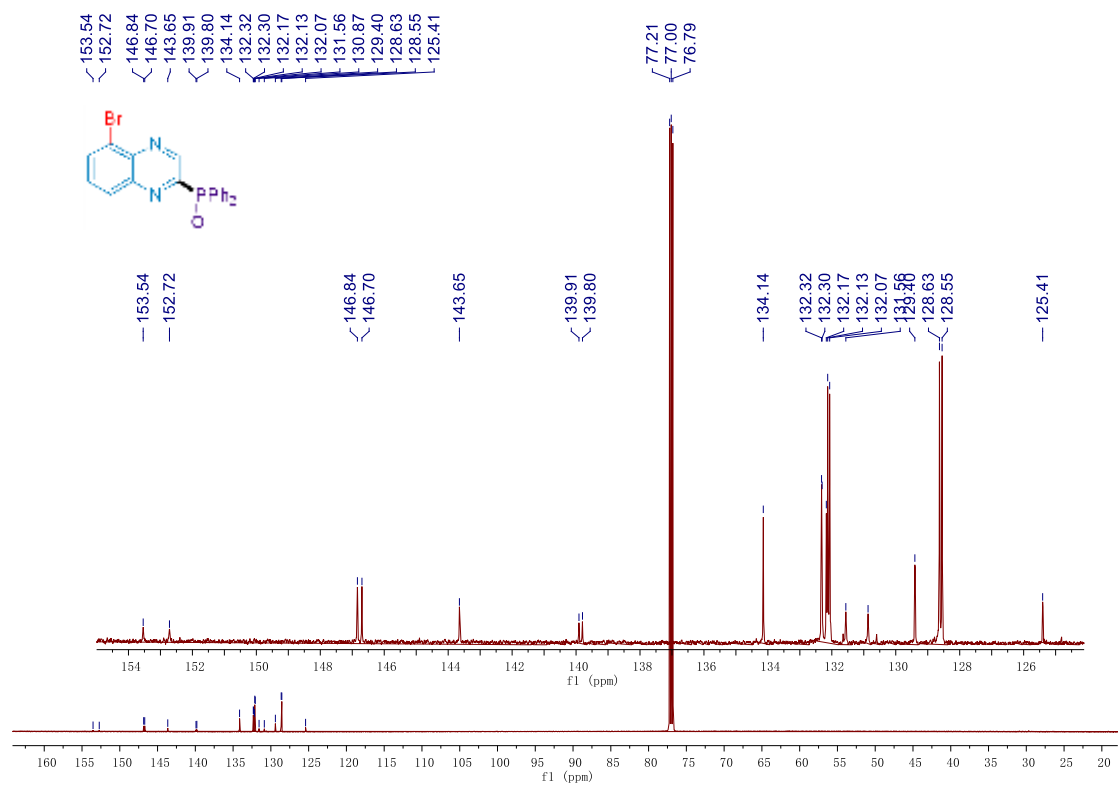

Fig.S 95 <sup>13</sup>C NMR of compound 3na-2

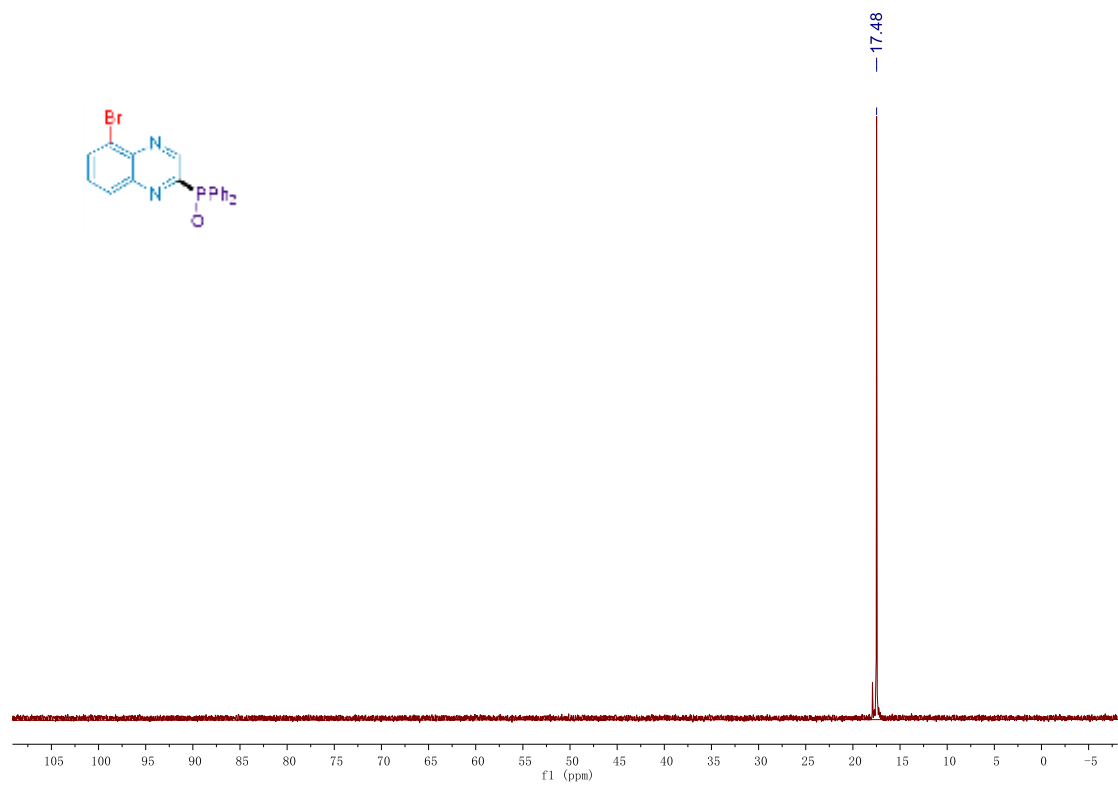

Fig.S 96 <sup>31</sup>P NMR of compound 3na-2

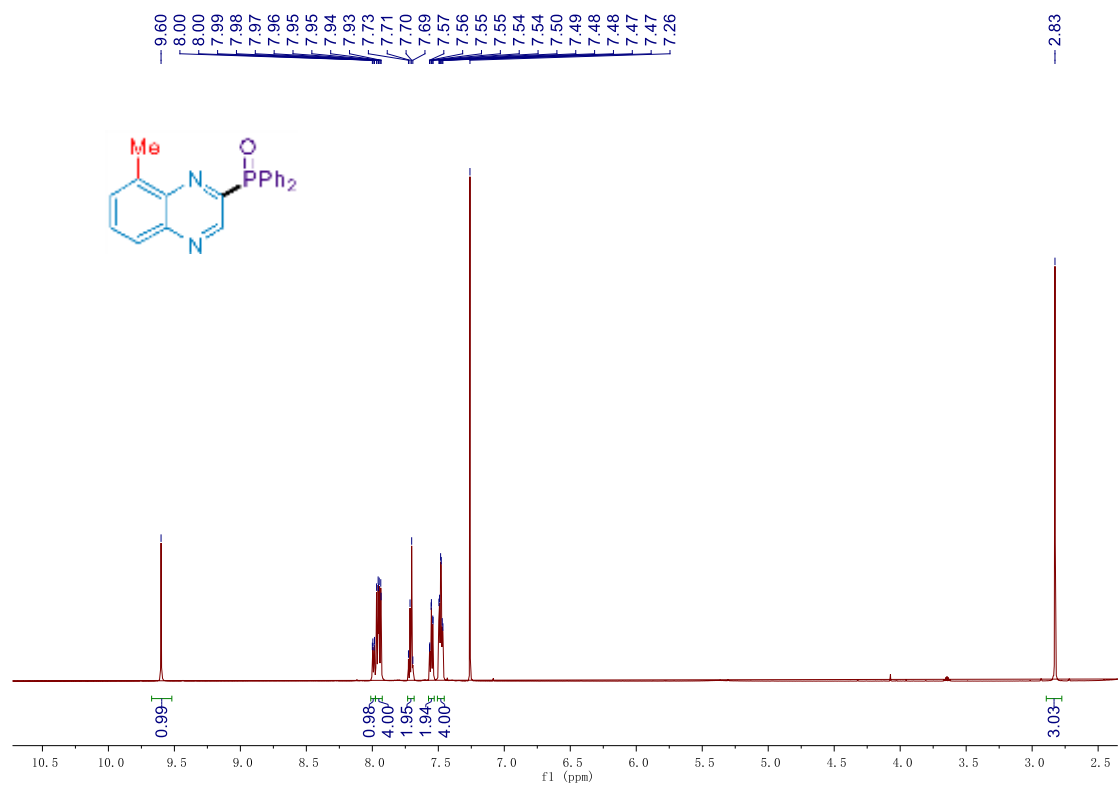

Fig.S 97  $^1\text{H NMR}$  of compound **30a-1**

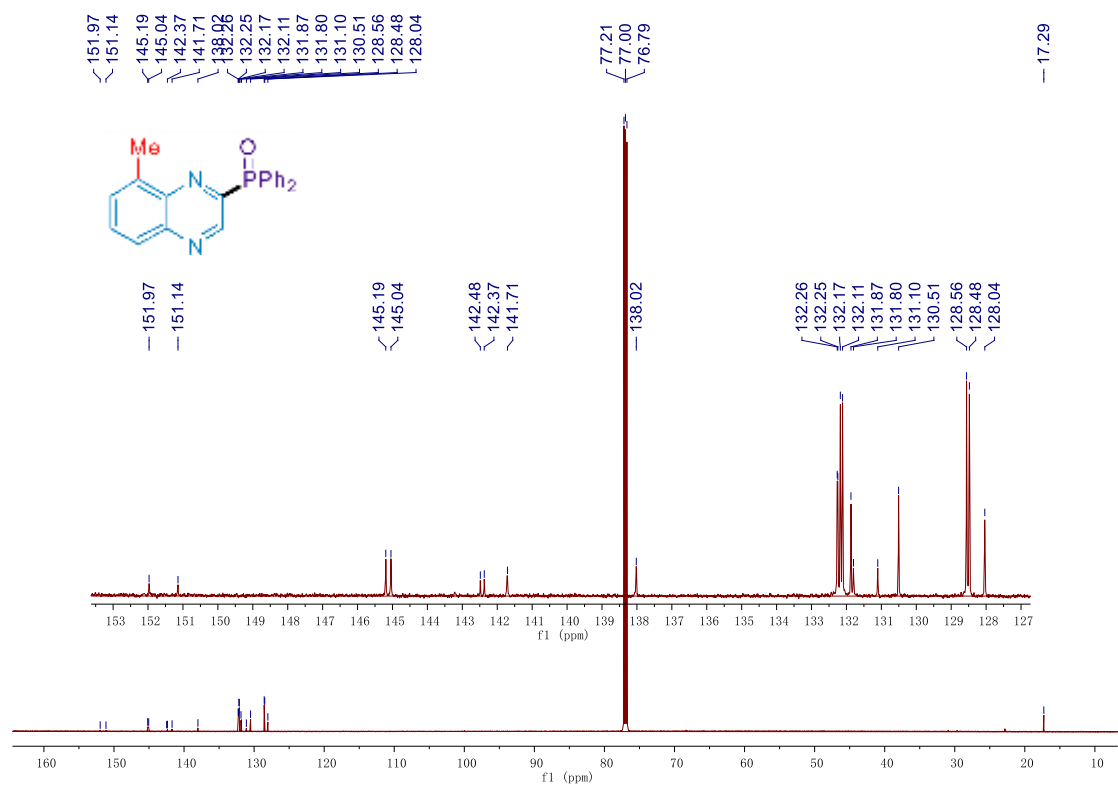

Fig.S 98  $^{13}\text{C NMR}$  of compound **30a-1**

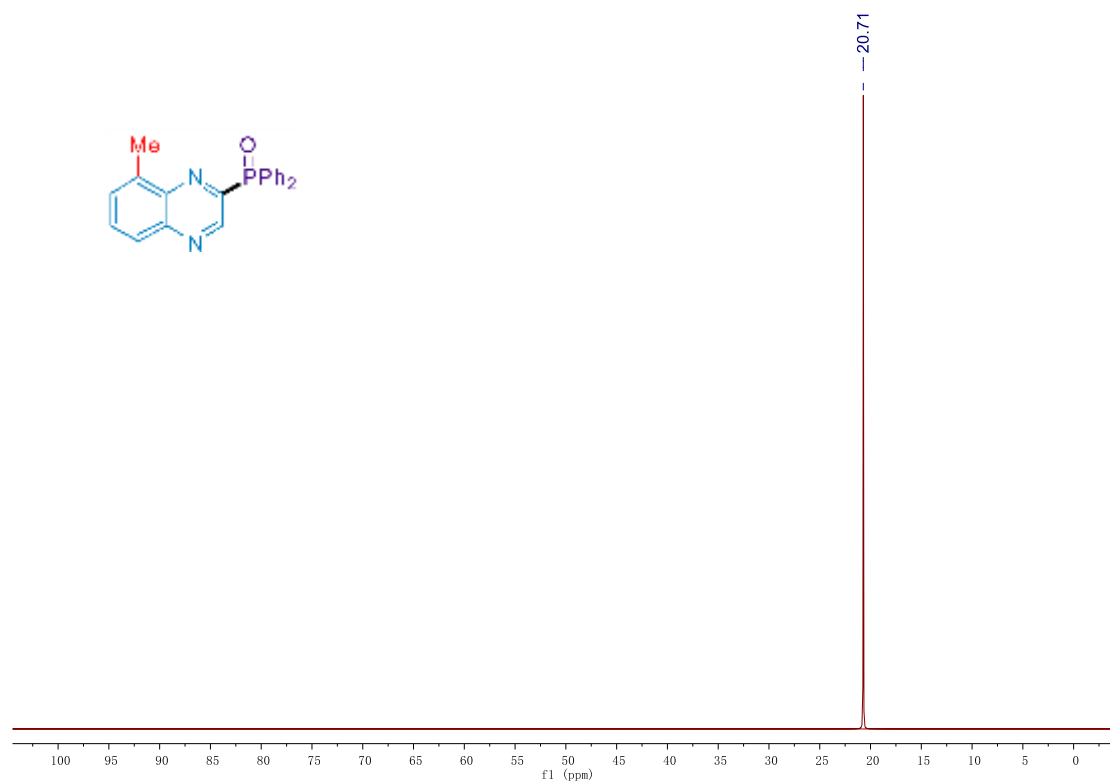

Fig.S 99  $^{31}\text{P}$  NMR of compound 30a-1

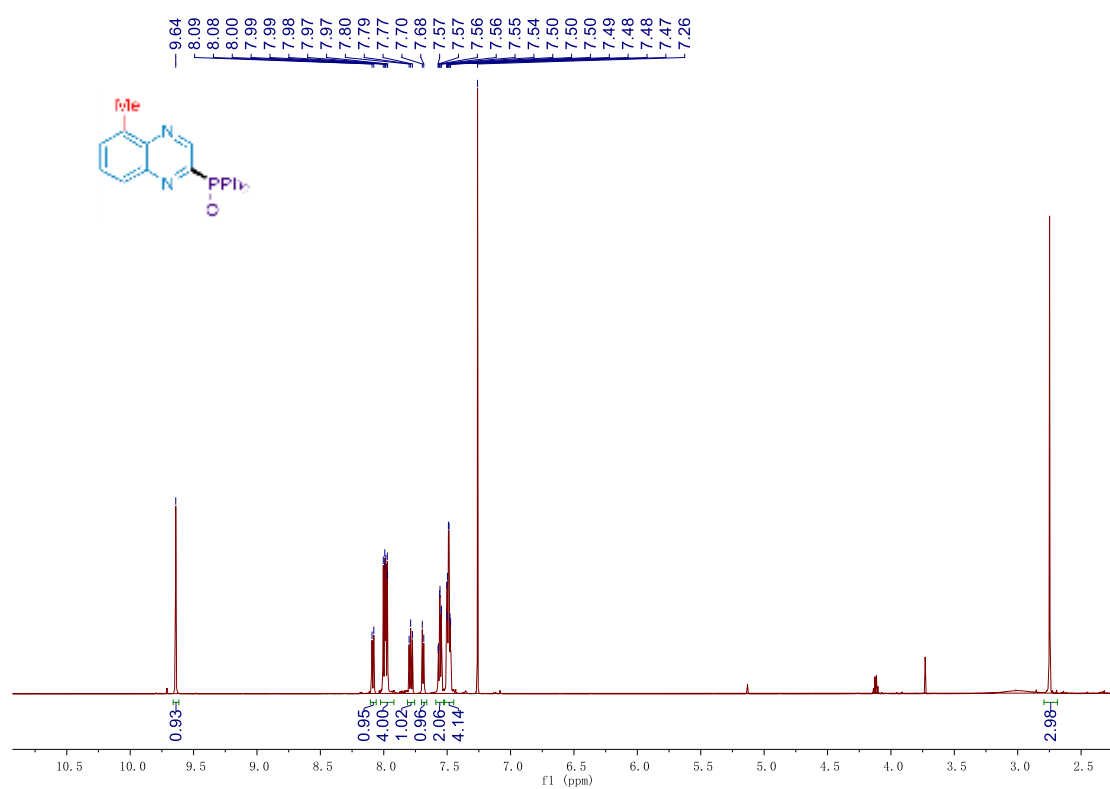

Fig.S 100  $^1\text{H}$  NMR of compound 30a-2

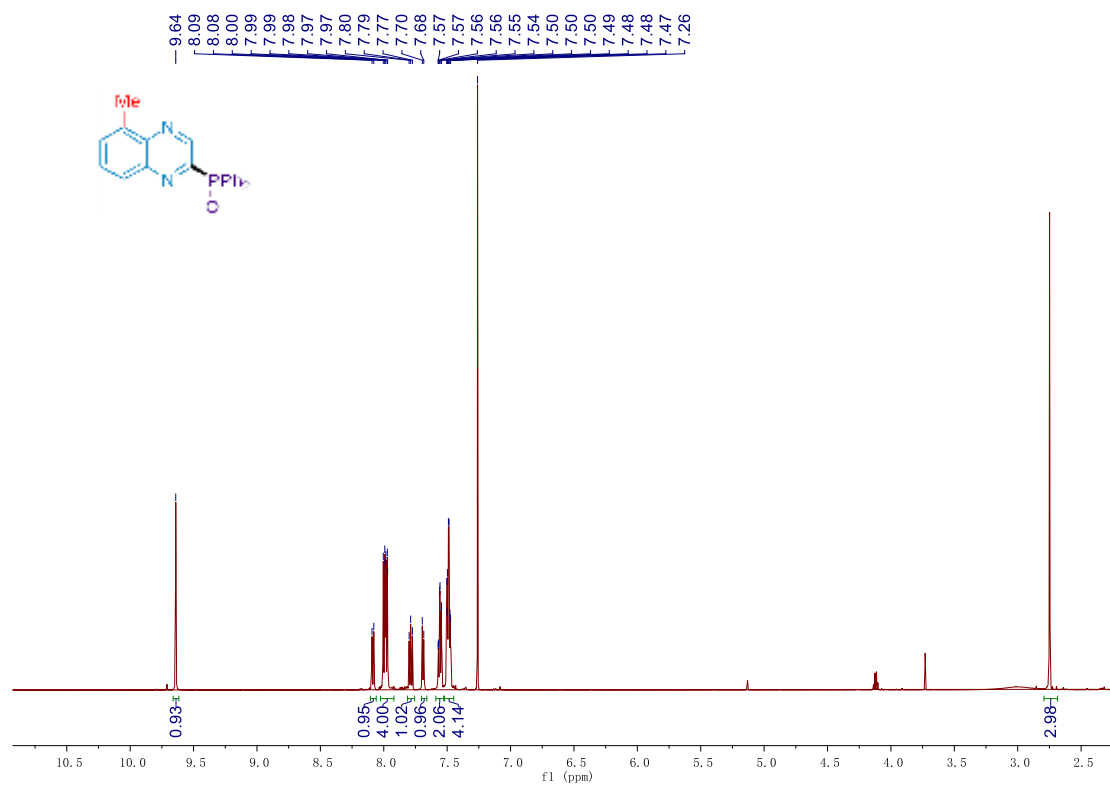

Fig.S 101  $^{13}\text{C}$  NMR of compound **30a-2**

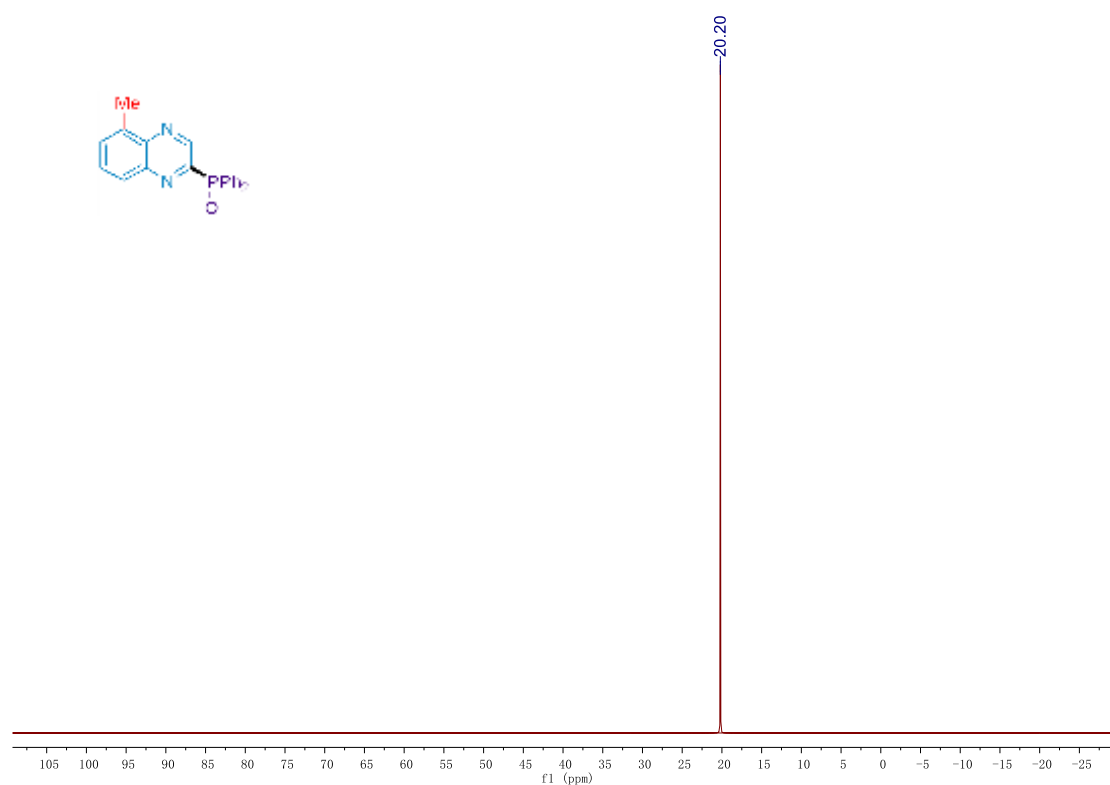

Fig.S 102  $^{31}\text{P}$  NMR of compound **30a-2**

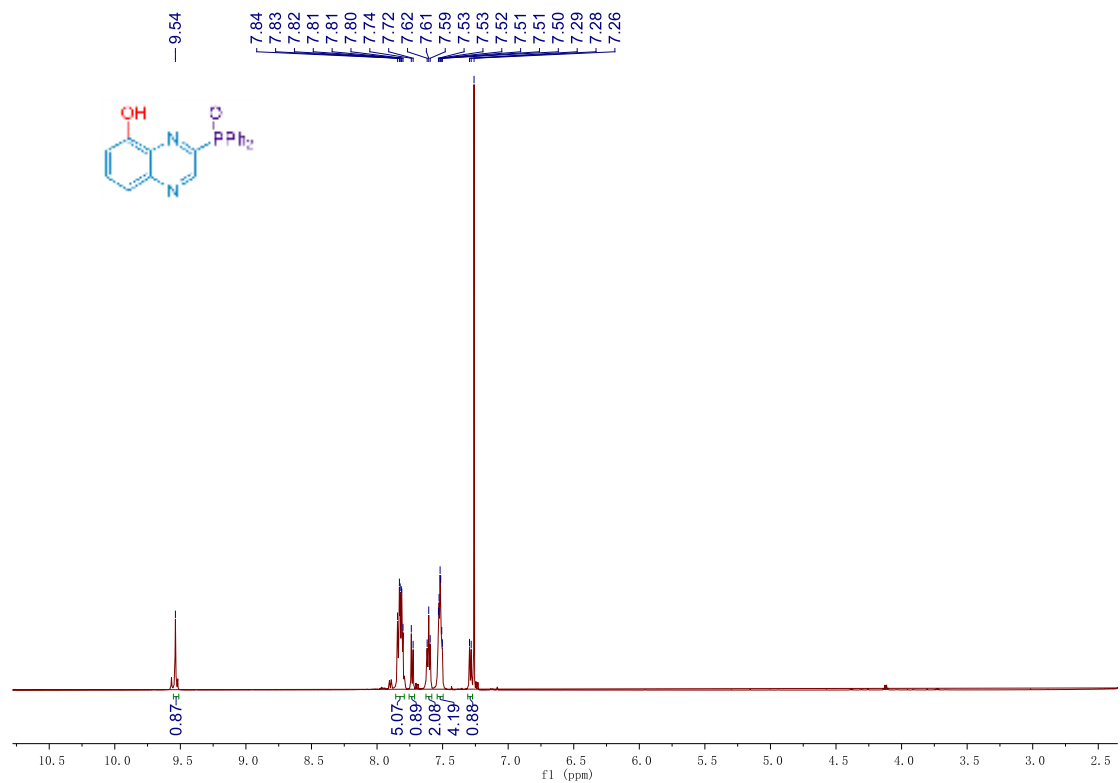

Fig.S 103 <sup>1</sup>H NMR of compound 3pa-1

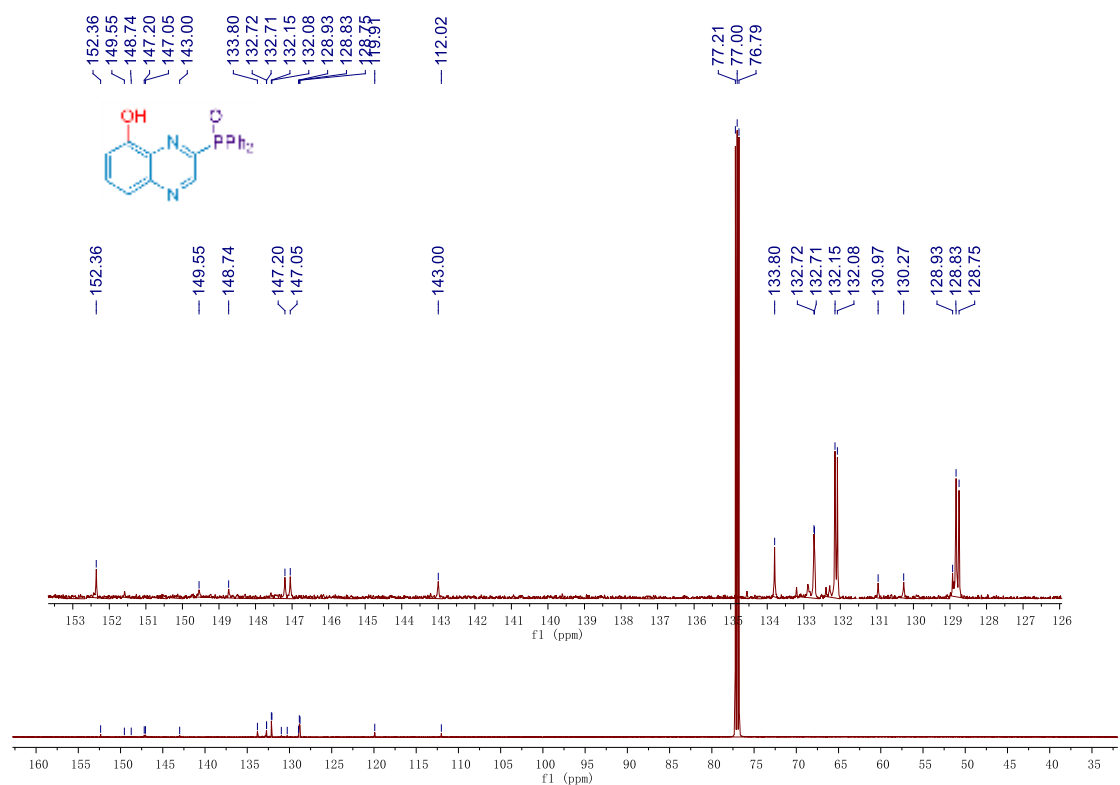

Fig.S 104 <sup>13</sup>C NMR of compound 3pa-1

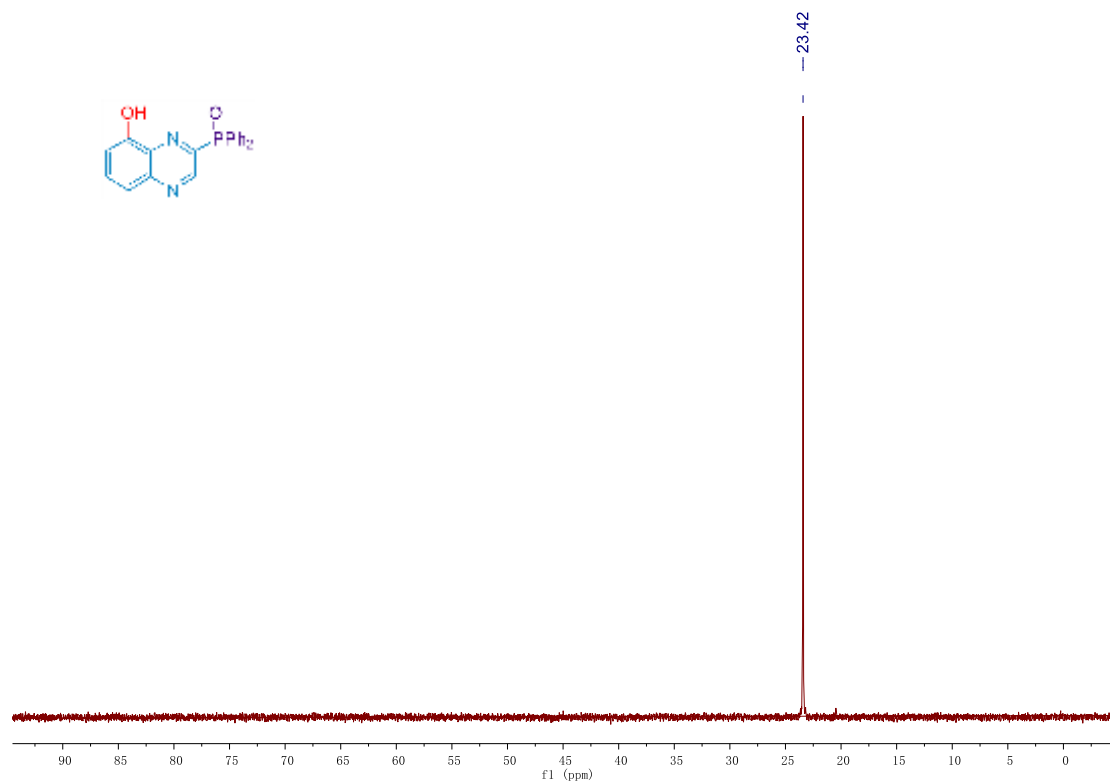

Fig.S 105  $^{31}\text{P}$  NMR of compound 3pa-1

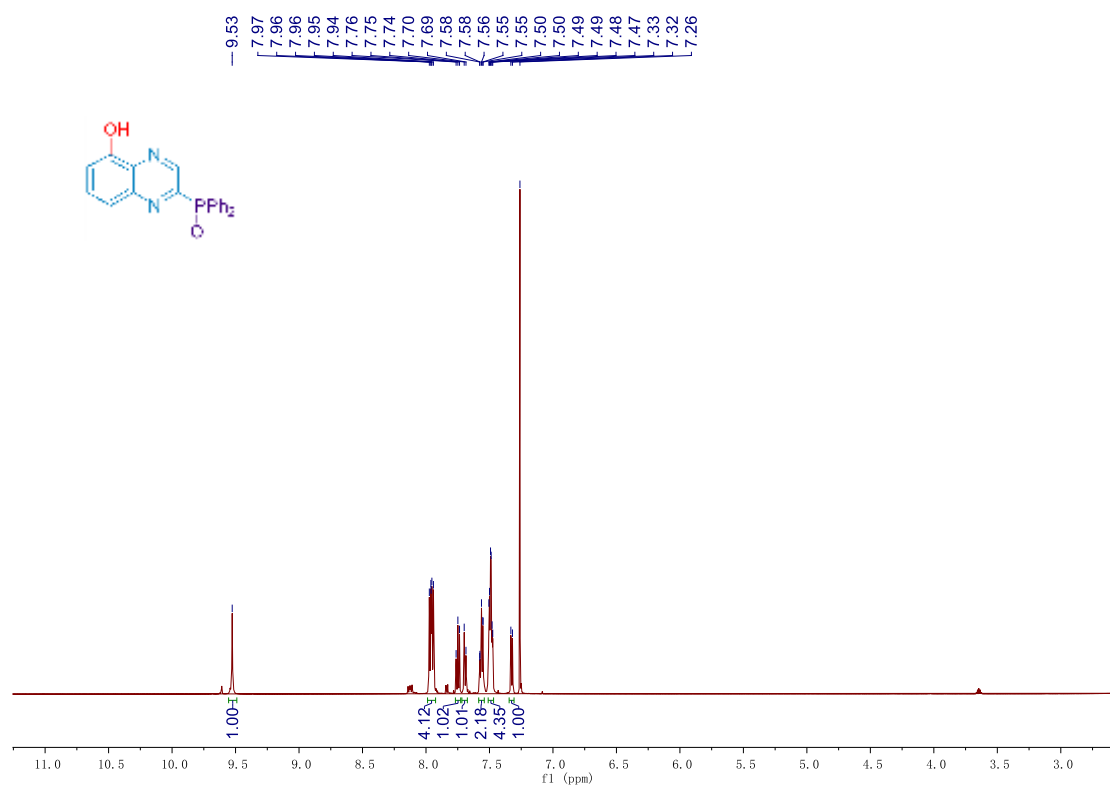

Fig.S 106  $^1\text{H}$  NMR of compound 3pa-2



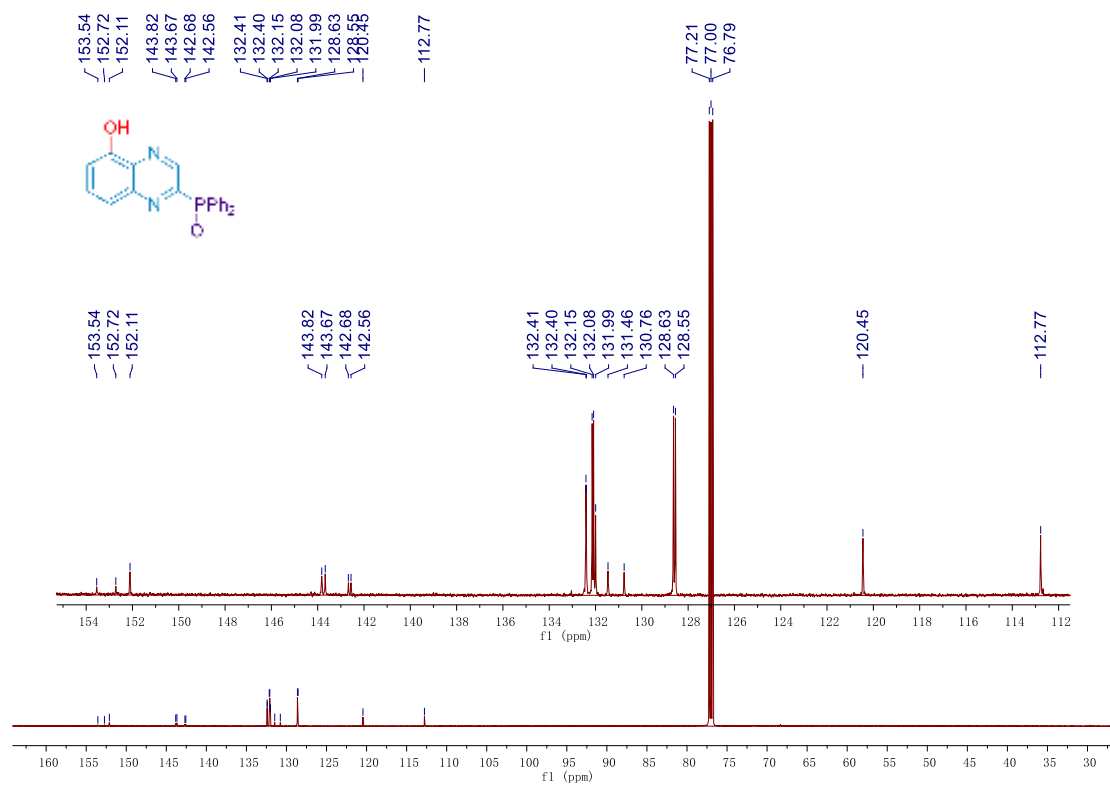

Fig.S 107 <sup>13</sup>C NMR of compound 3pa-2

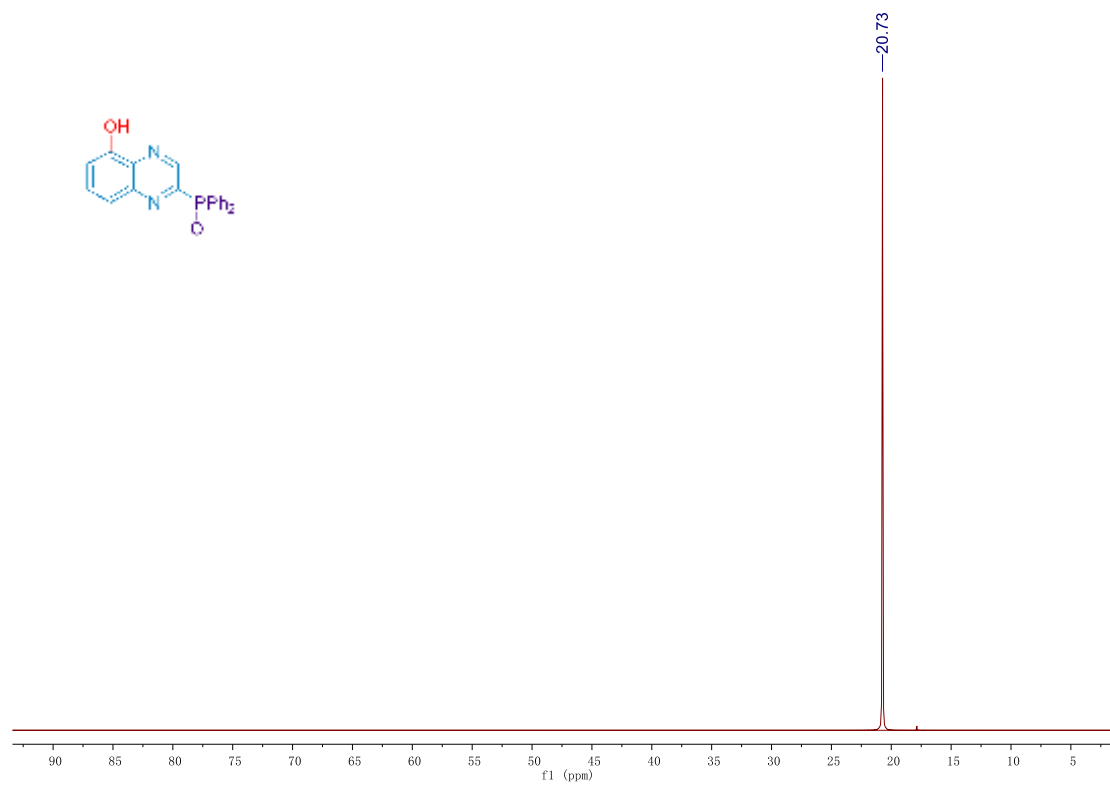

Fig.S 108 <sup>31</sup>P NMR of compound 3pa-2

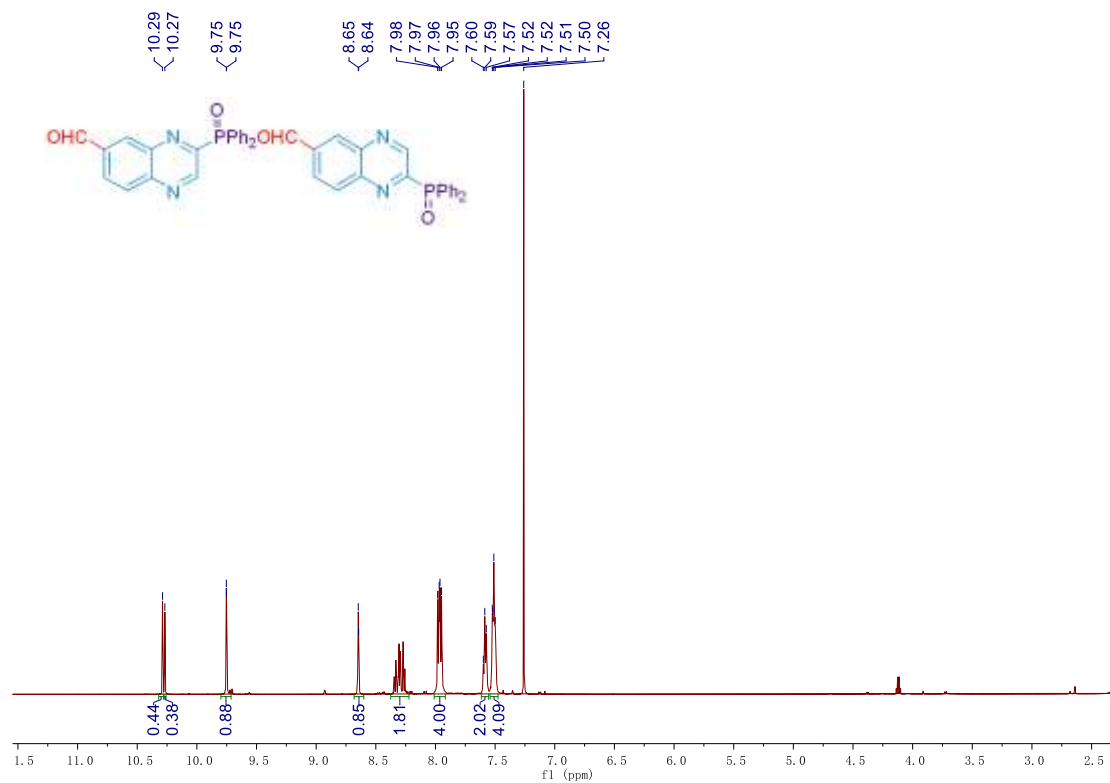

Fig.S 109  $^1\text{H}$  NMR of compound 3qa

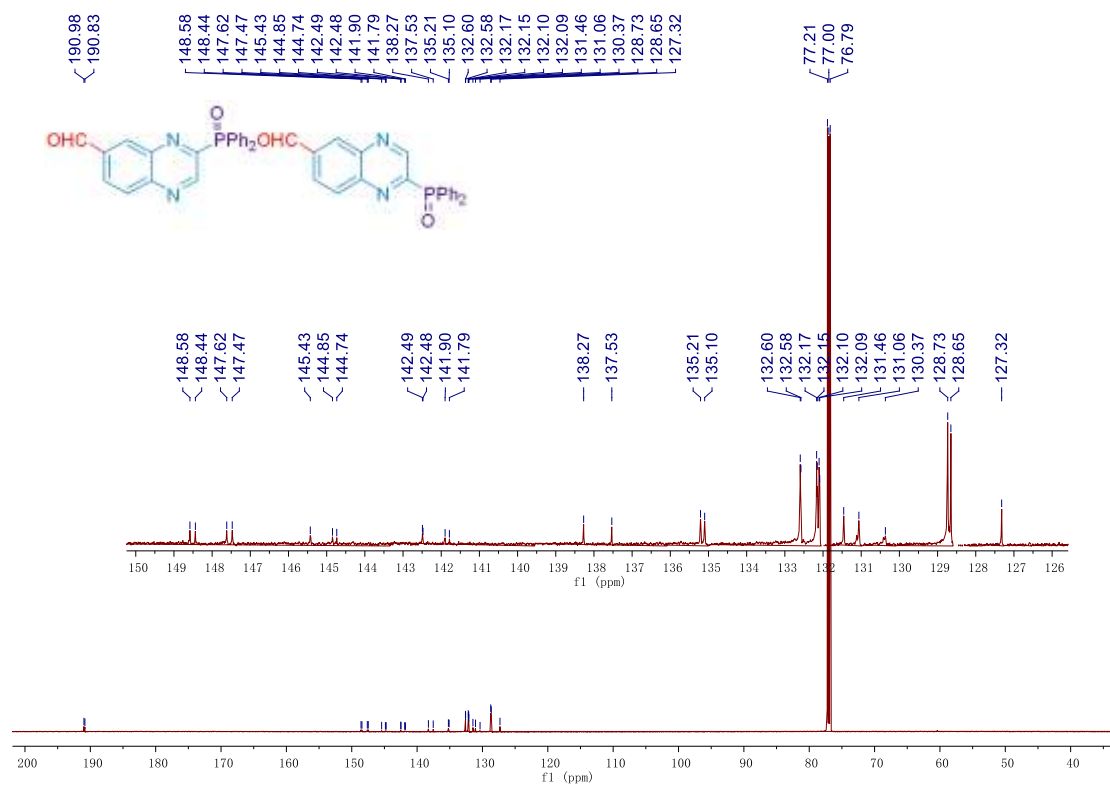

Fig.S 110  $^{13}\text{C}$  NMR of compound 3qa

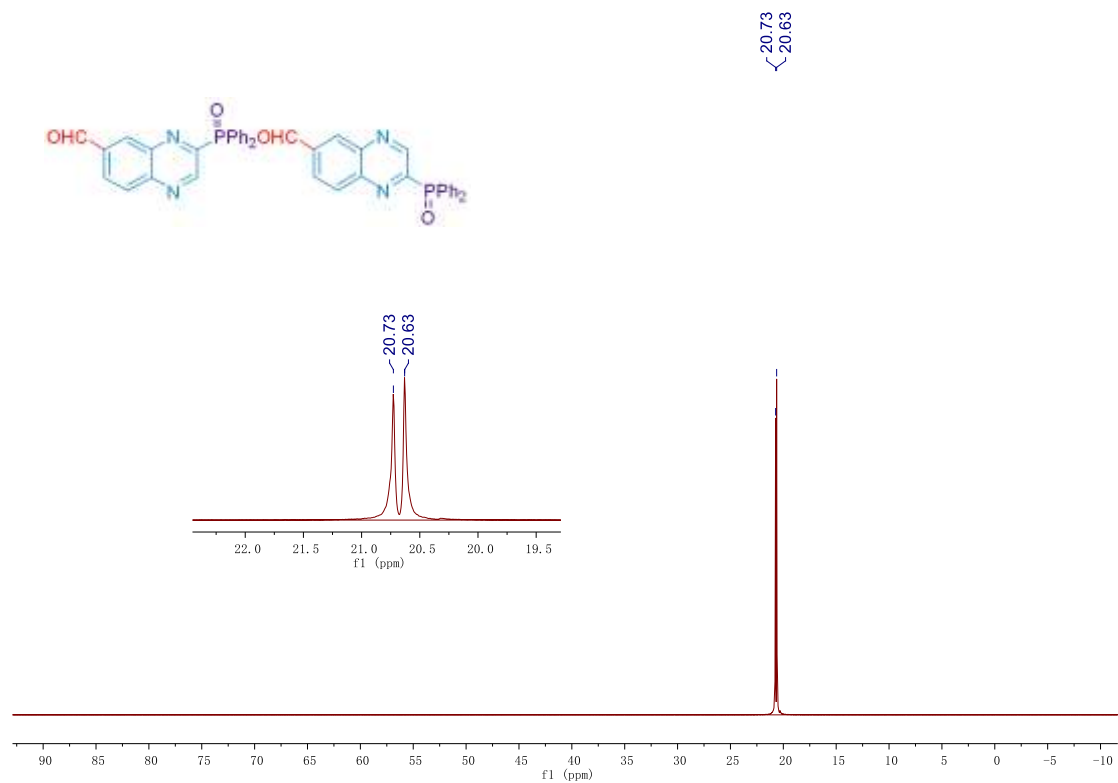

Fig.S 111  $^{31}\text{P}$  NMR of compound 3qa

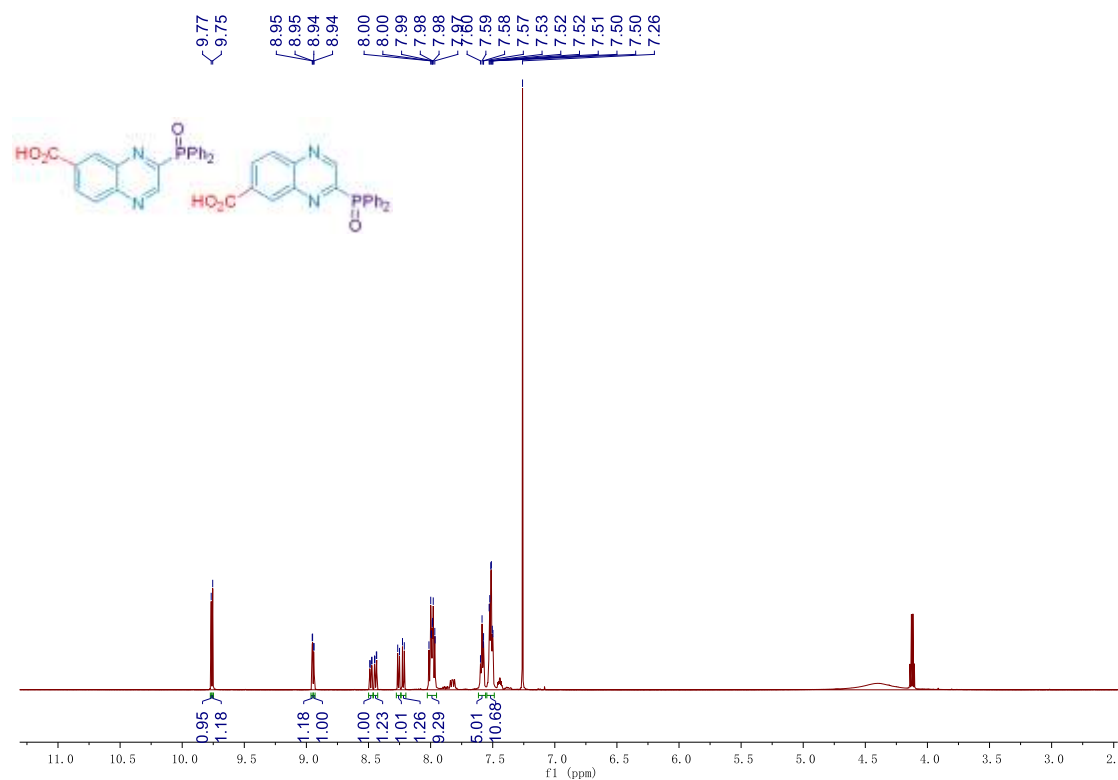

Fig.S 112  $^1\text{H}$  NMR of compound 3ra

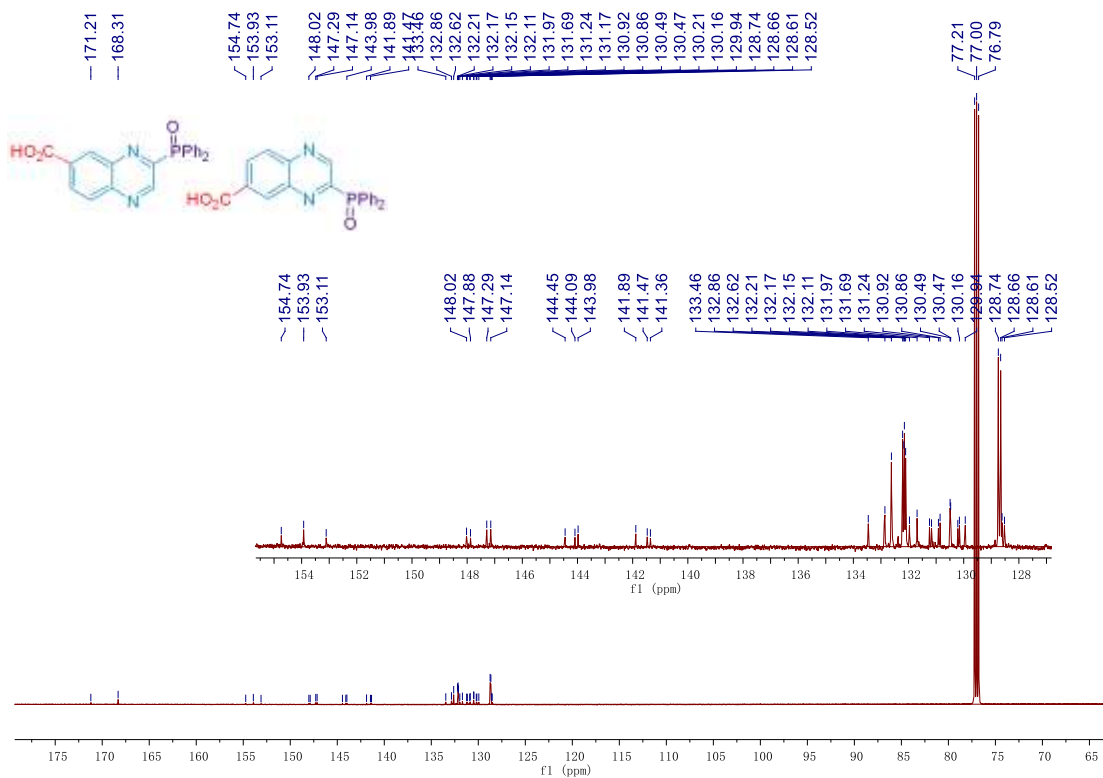

Fig.S 113  $^{13}\text{C}$  NMR of compound 3ra

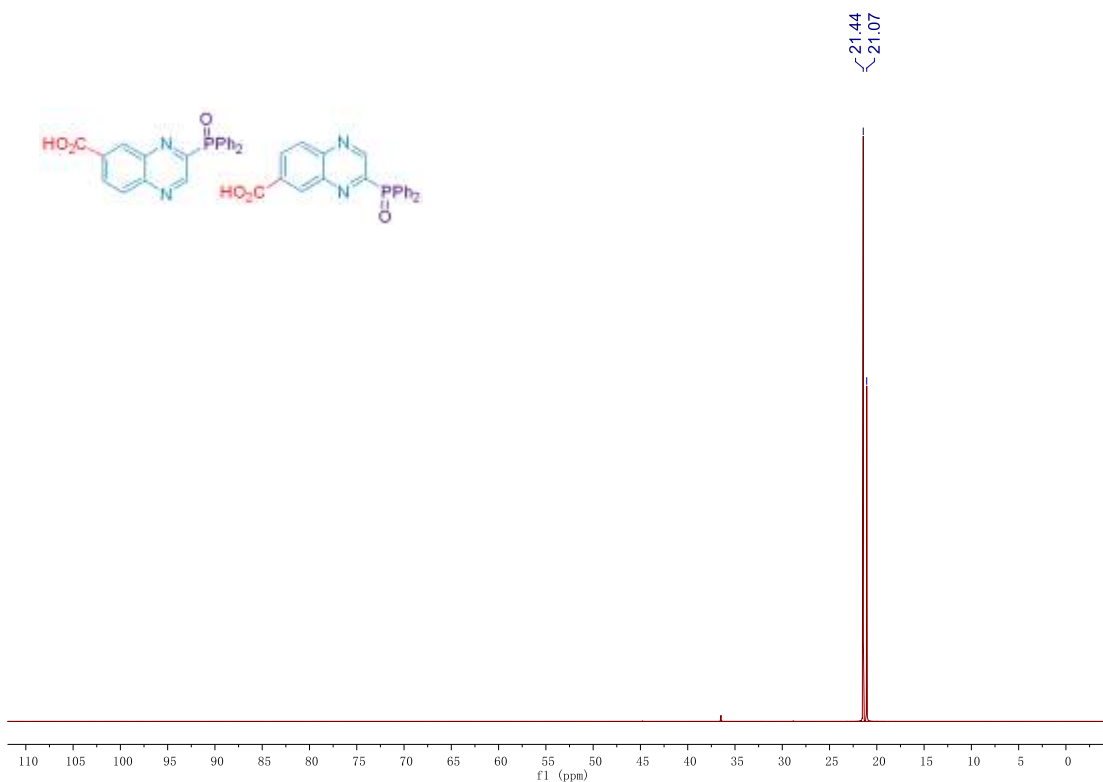

Fig.S 114  $^{31}\text{P}$  NMR of compound 3ra

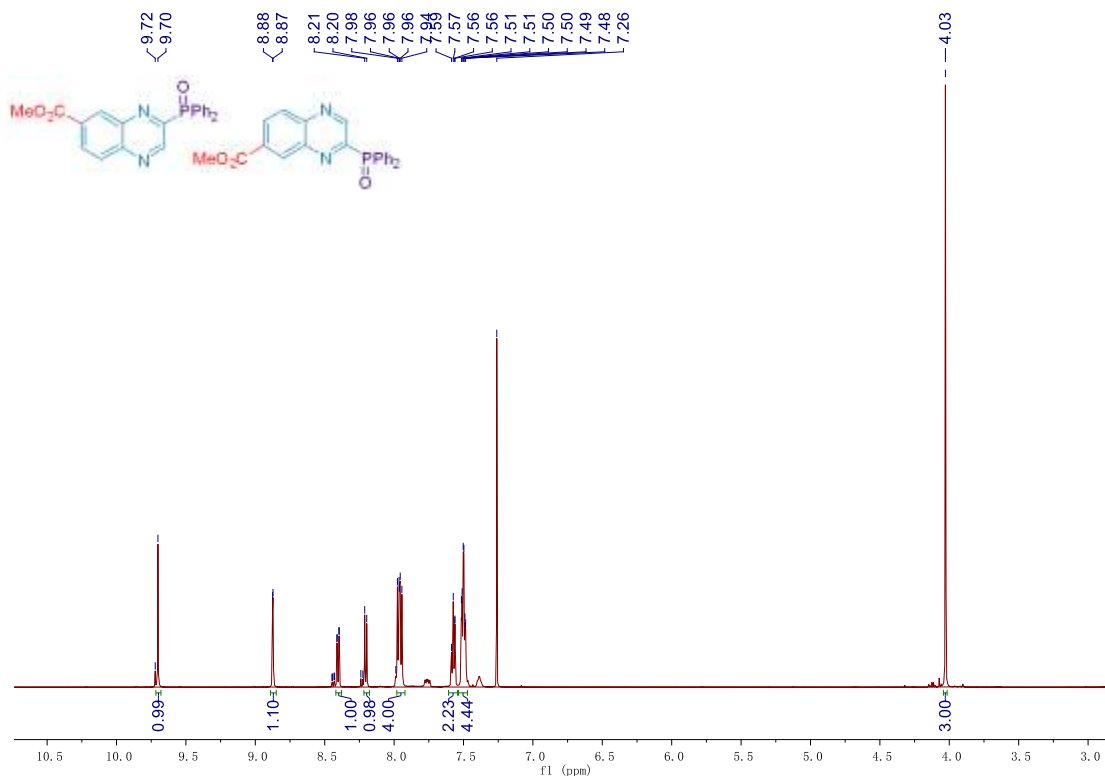

Fig.S 115  $^1\text{H}$  NMR of compound 3sa

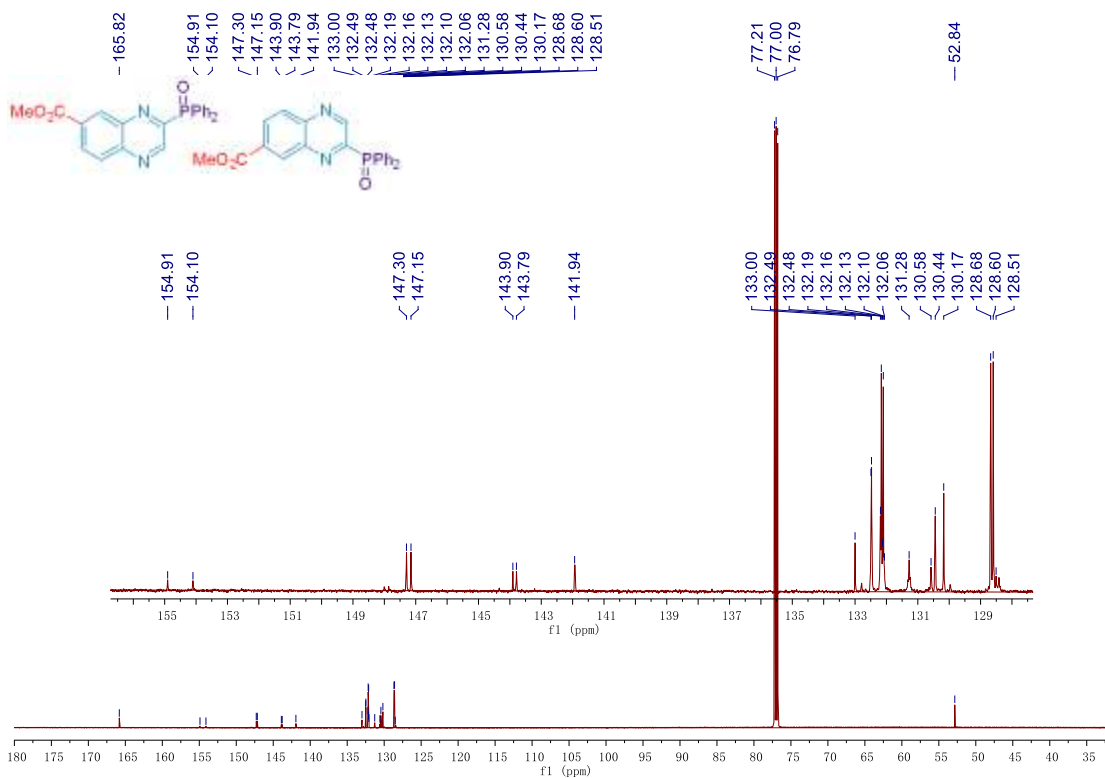

Fig.S 116  $^{13}\text{C}$  NMR of compound 3sa

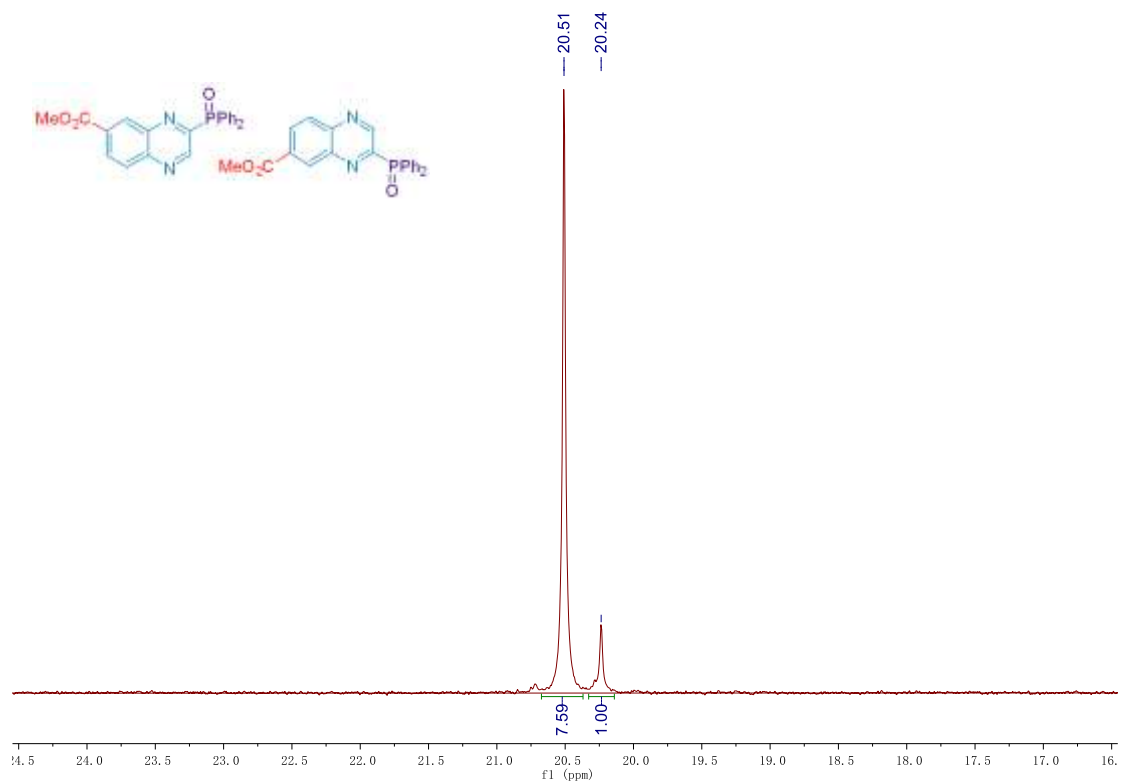

Fig.S 117  $^{31}\text{P}$  NMR of compound 3sa

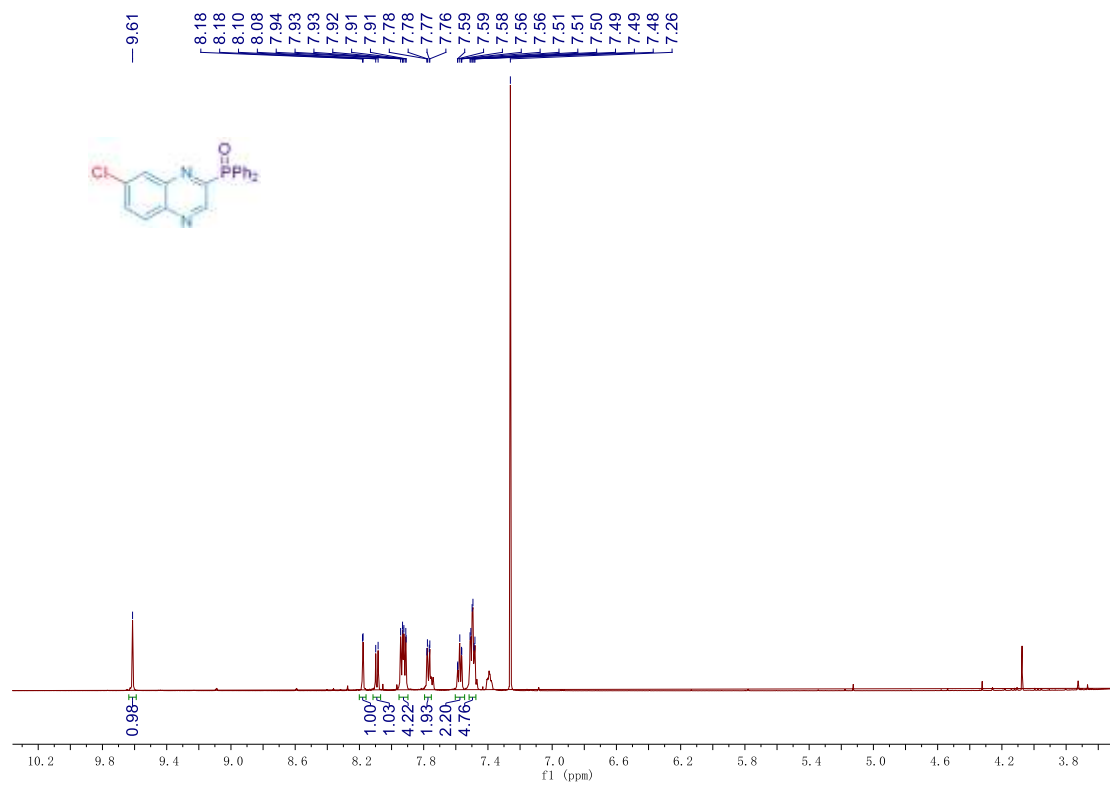

Fig.S 118  $^1\text{H}$  NMR of compound 3ta-1

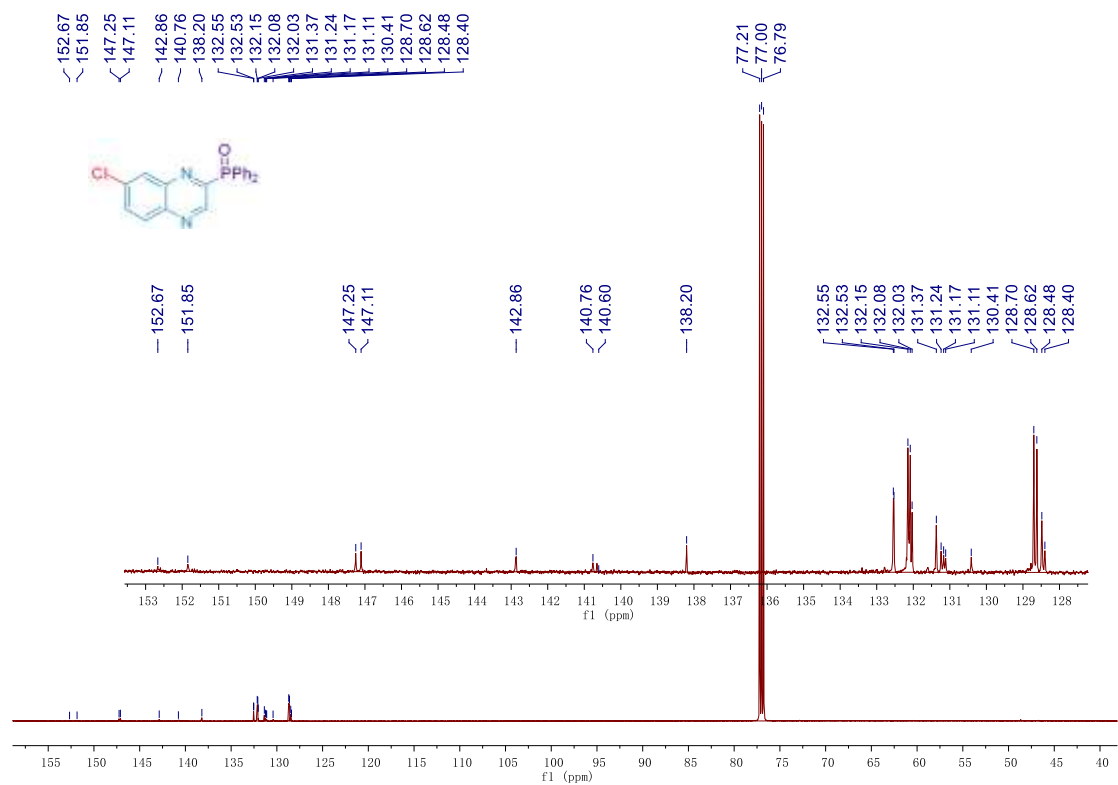

Fig.S 119  $^{13}\text{C}$  NMR of compound 3ta-1

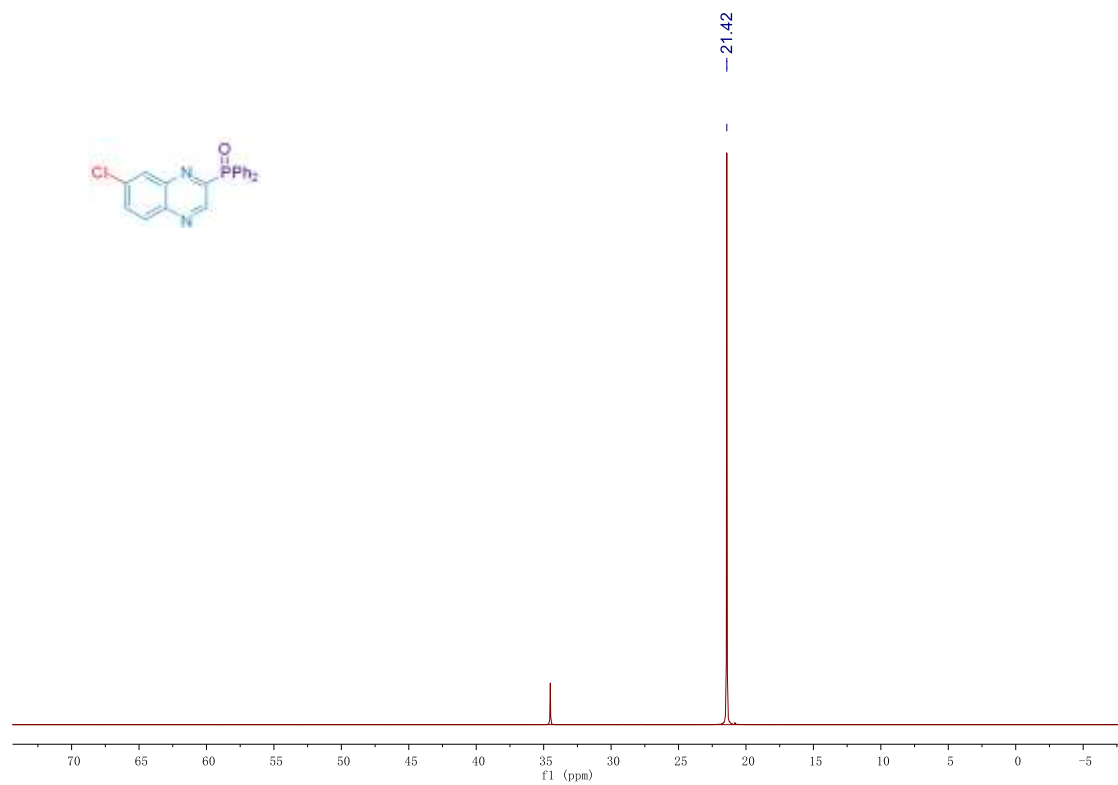

Fig.S 120  $^{31}\text{P}$  NMR of compound 3ta-1

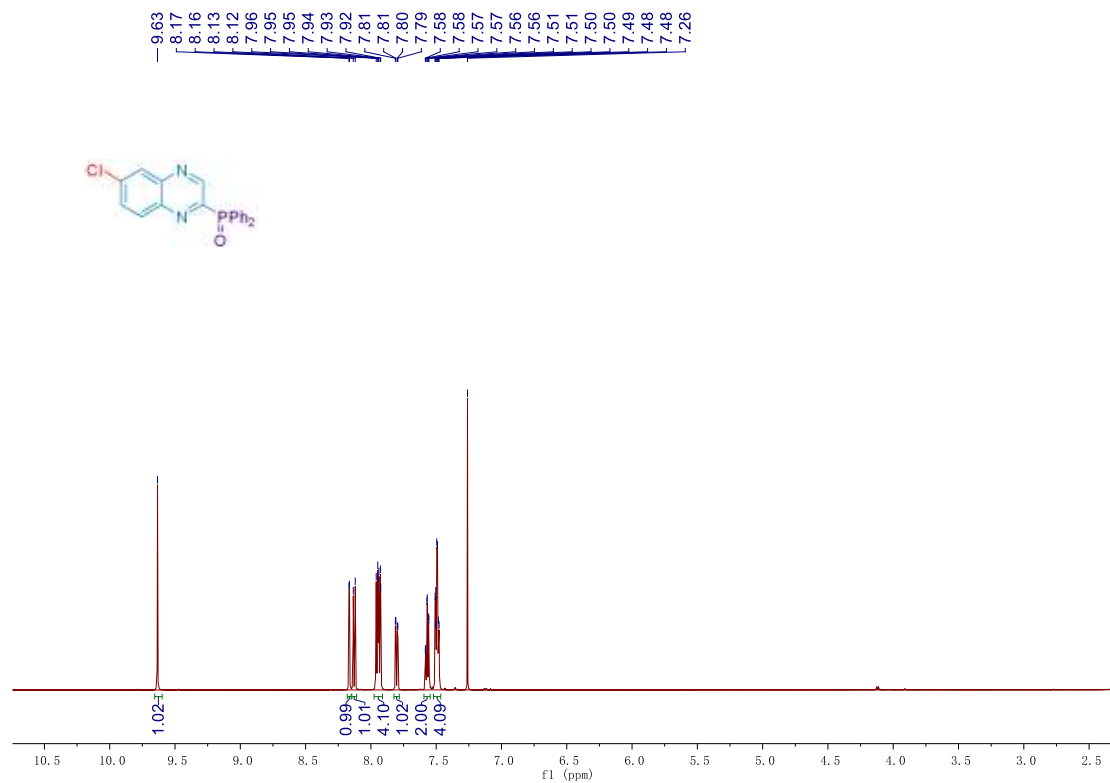

Fig.S 121  $^1\text{H NMR}$  of compound 3ta-2

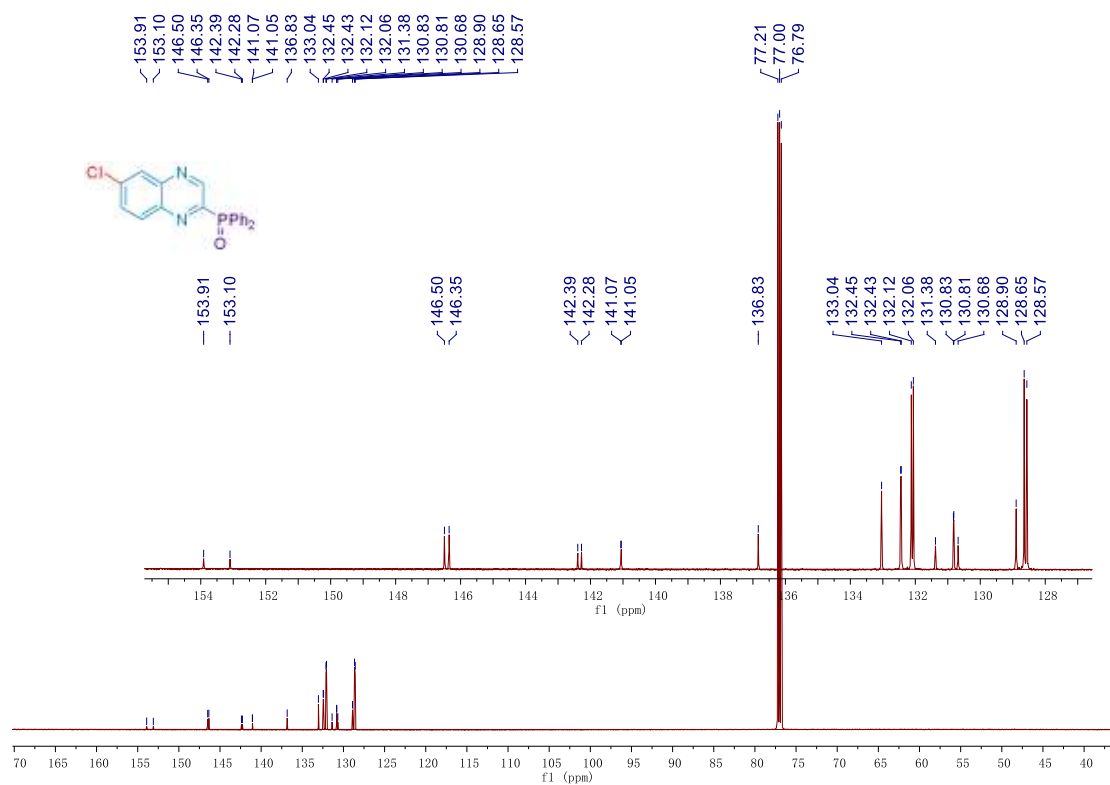

Fig.S 122  $^{13}\text{C NMR}$  of compound 3ta-2



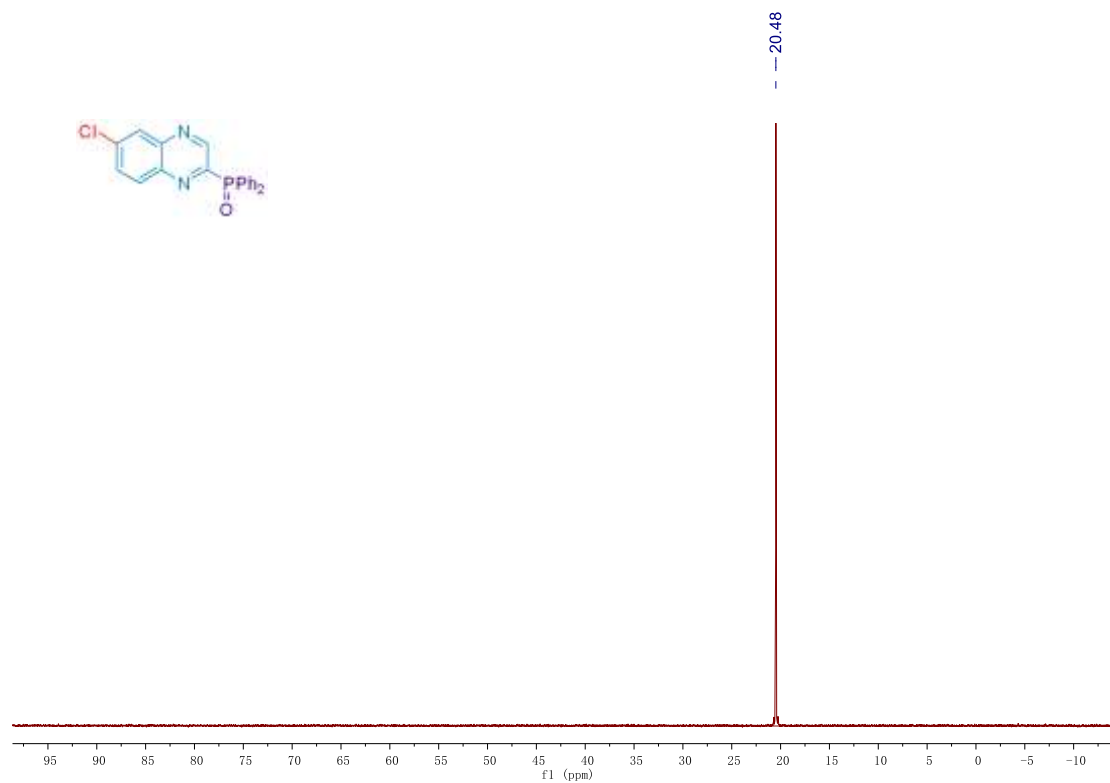

Fig.S 123  $^{31}\text{P}$  NMR of compound 3ta-2

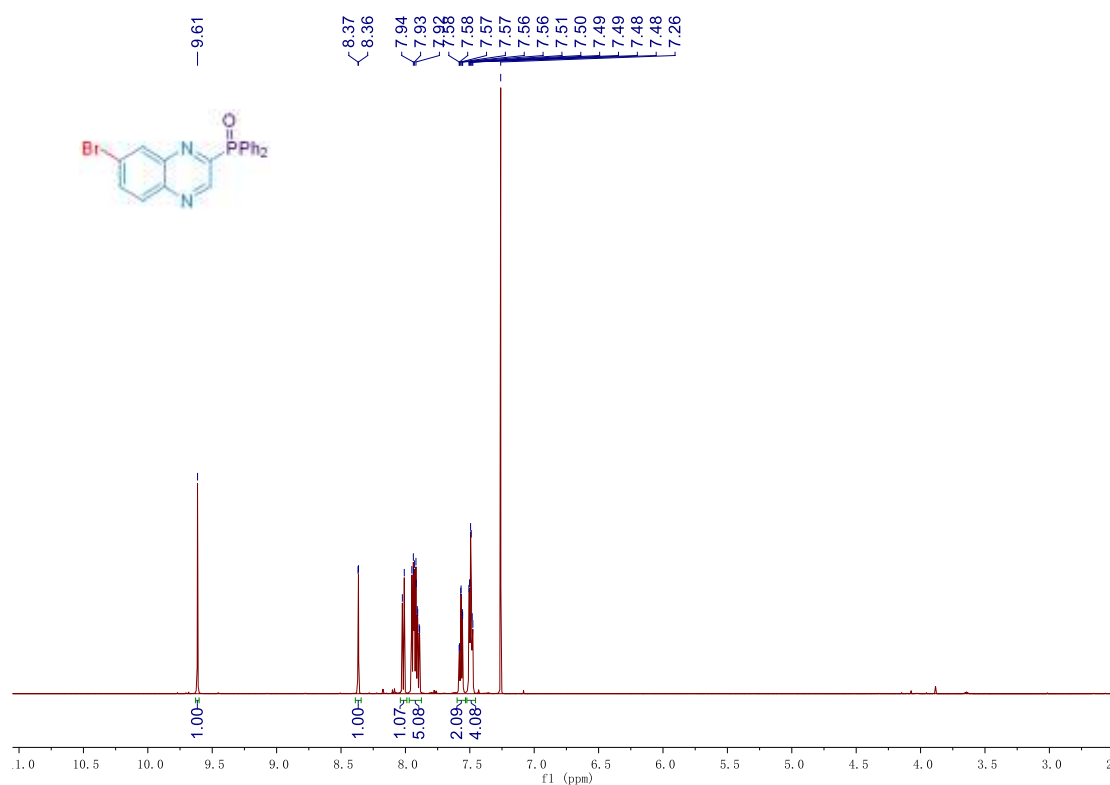

Fig.S 124  $^1\text{H}$  NMR of compound 3ua-1

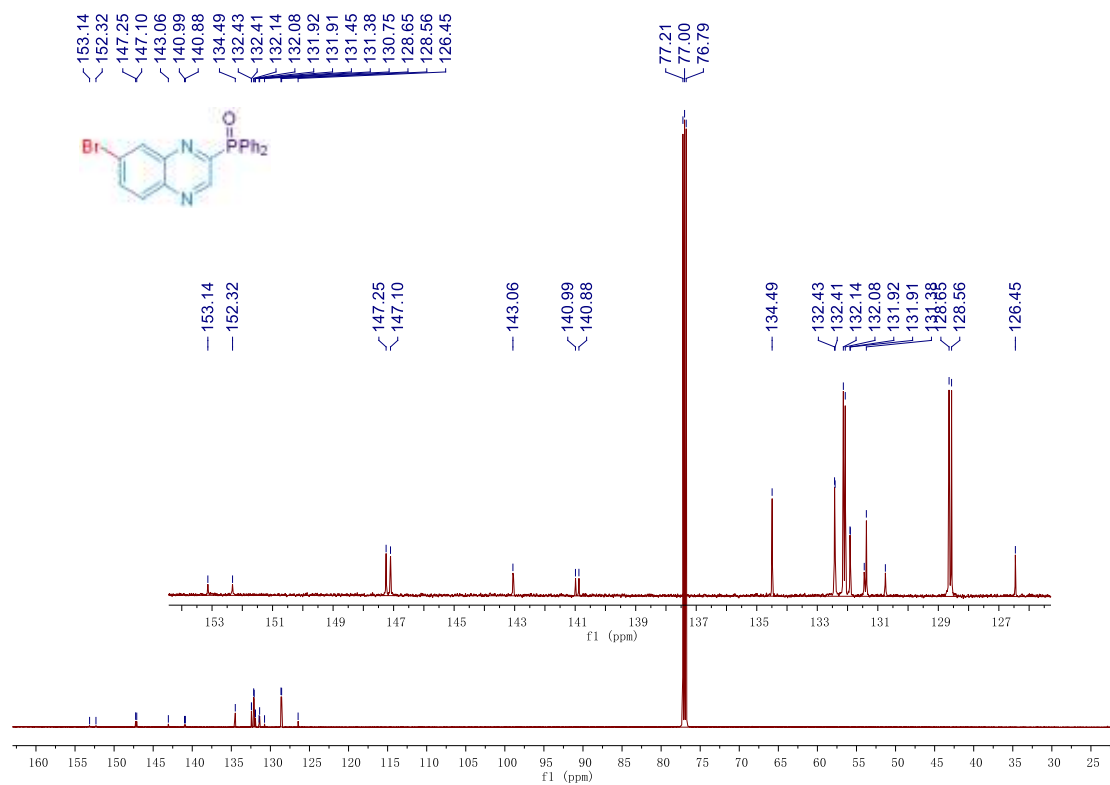

Fig.S 125  $^{13}\text{C}$  NMR of compound 3ua-1

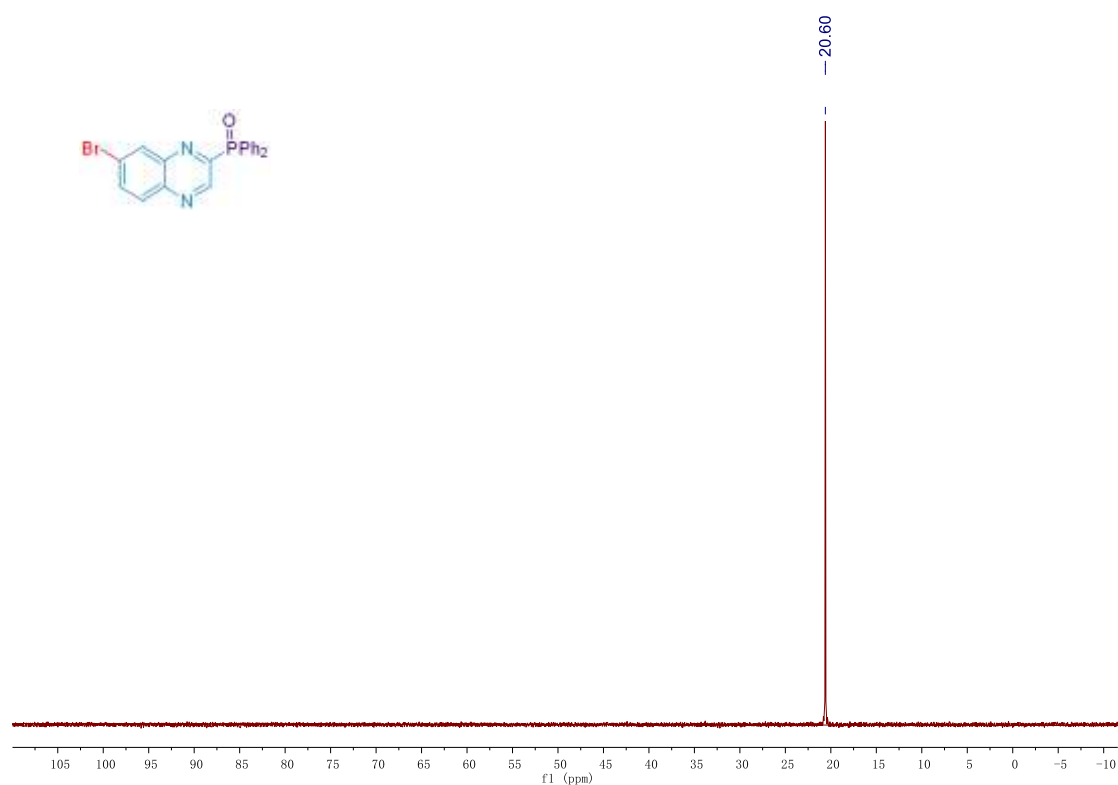

Fig.S 126  $^{31}\text{P}$  NMR of compound 3ua-1

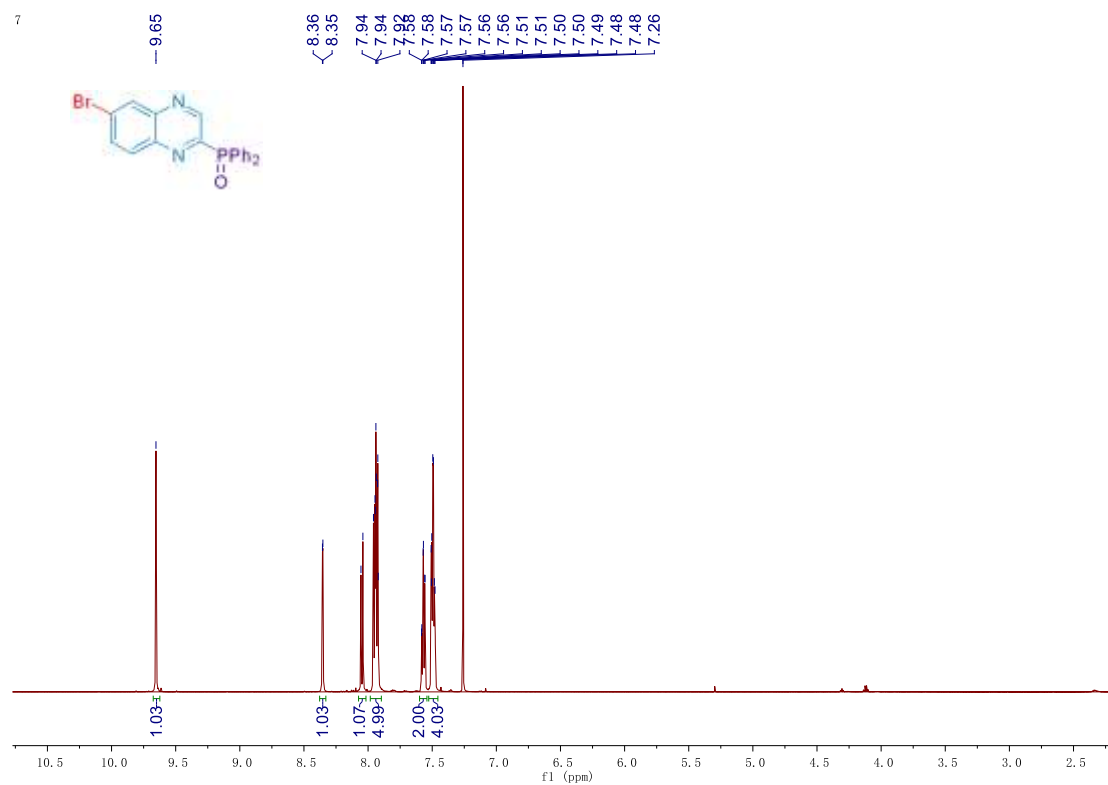Fig.S 127  $^1\text{H}$  NMR of compound 3ua-2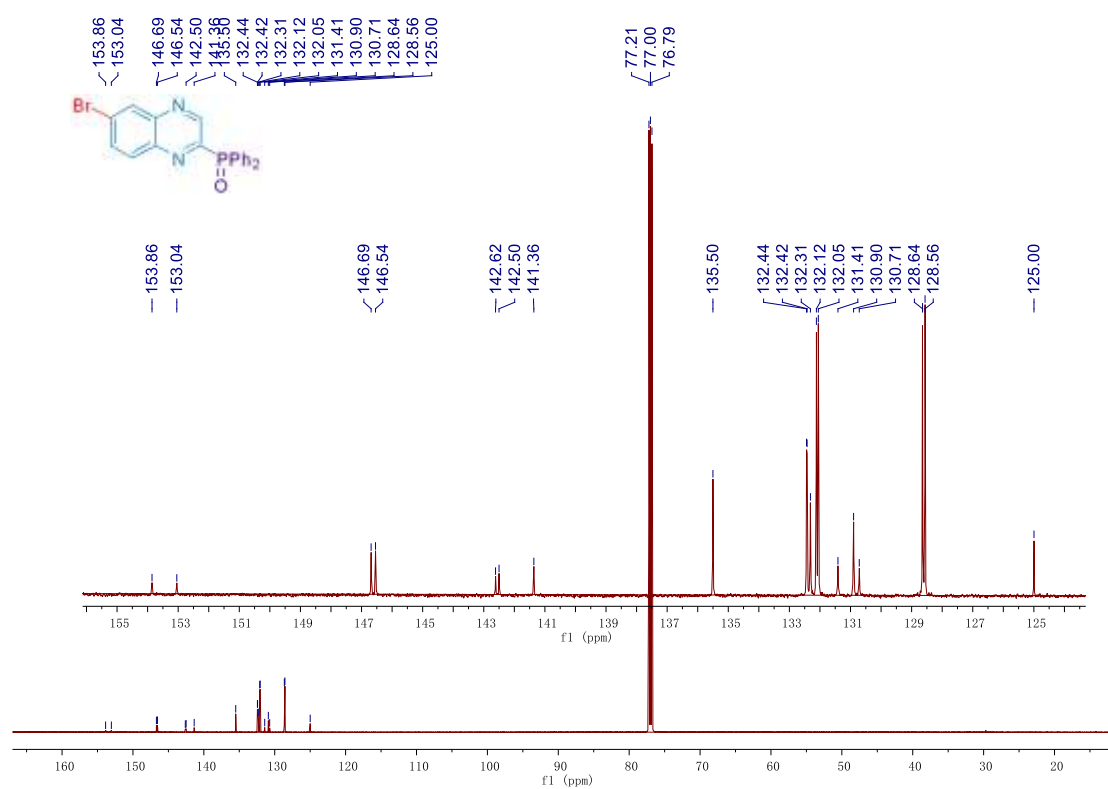Fig.S 128  $^{13}\text{C}$  NMR of compound 3ua-2

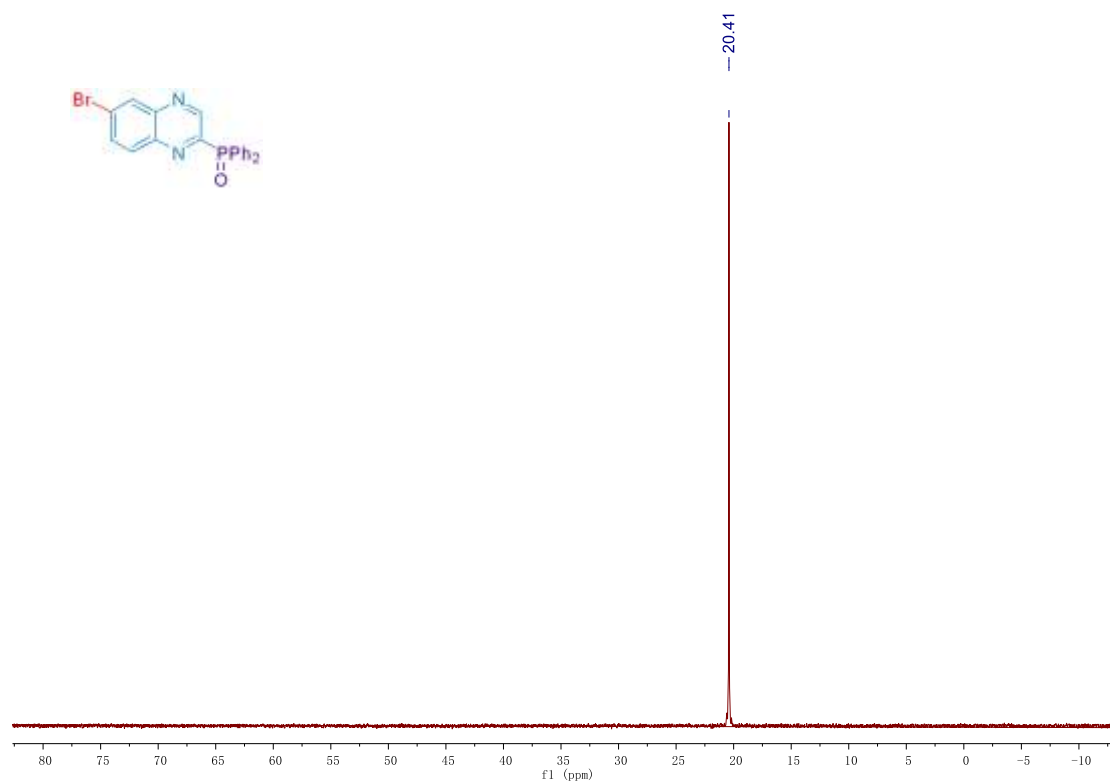

Fig.S 129  $^{31}\text{P}$  NMR of compound 3ua-2

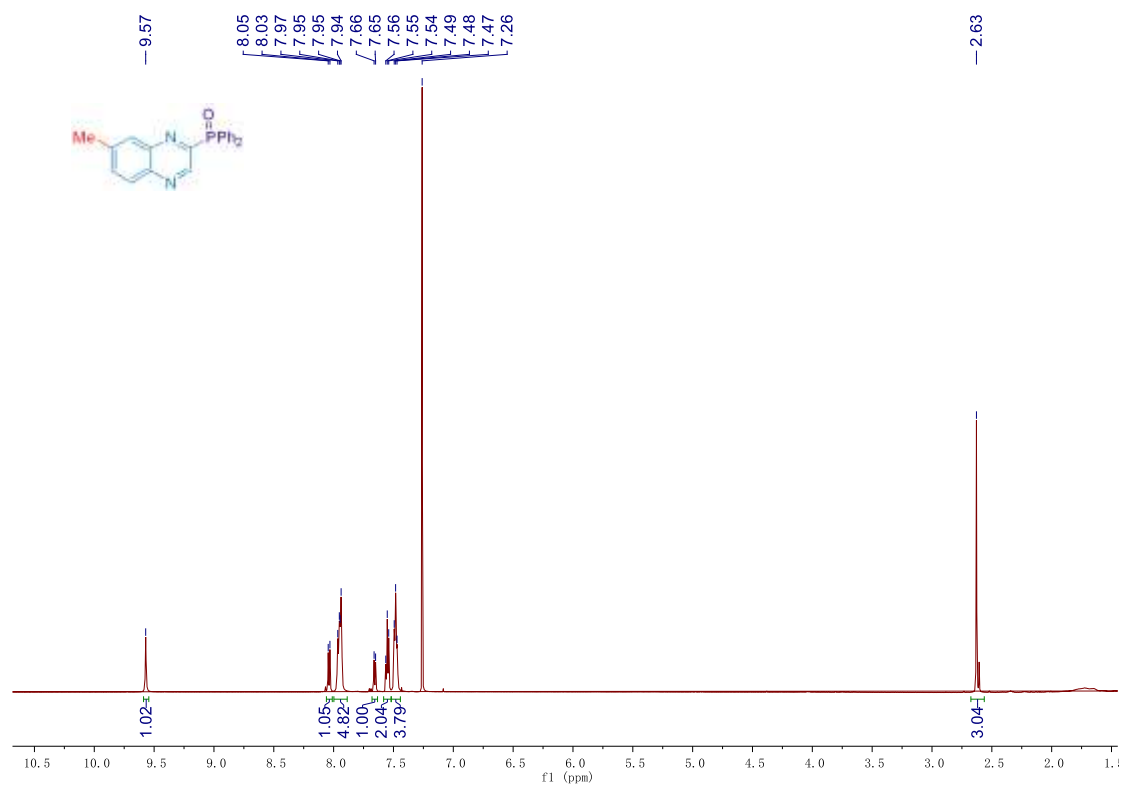

Fig.S 130  $^1\text{H}$  NMR of compound 3va-1

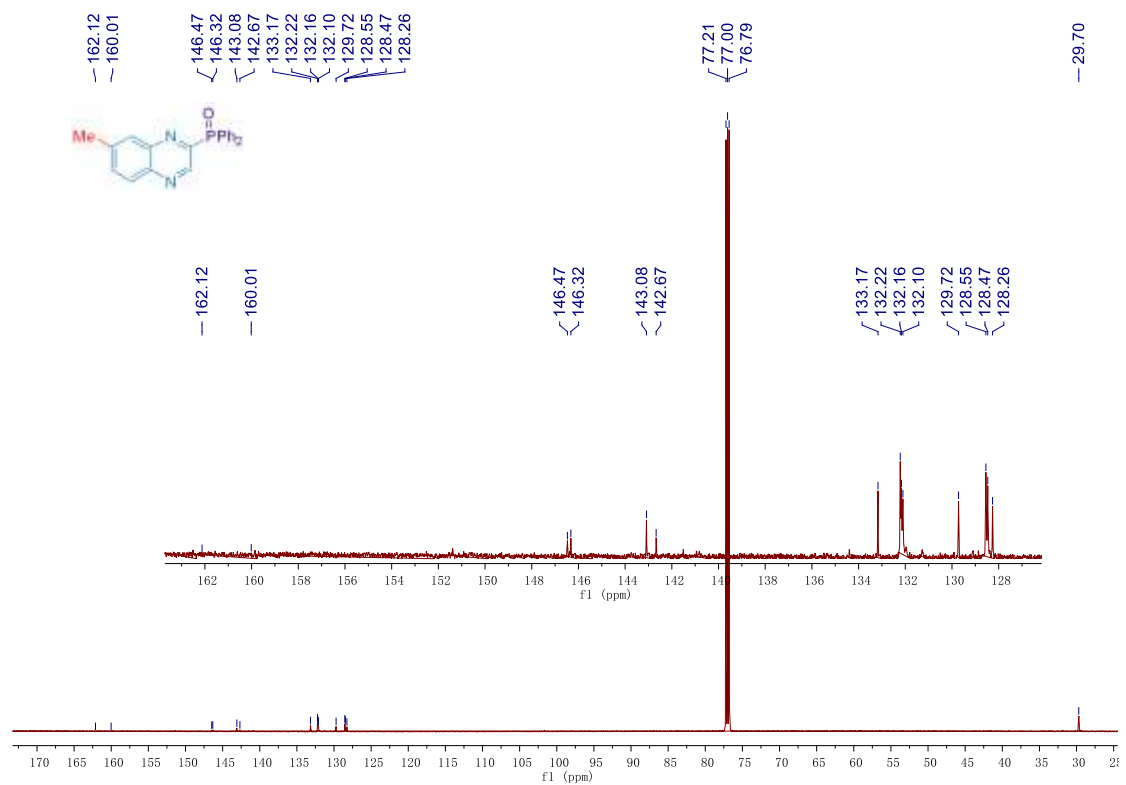

Fig.S 131 <sup>13</sup>C NMR of compound **3va-1**

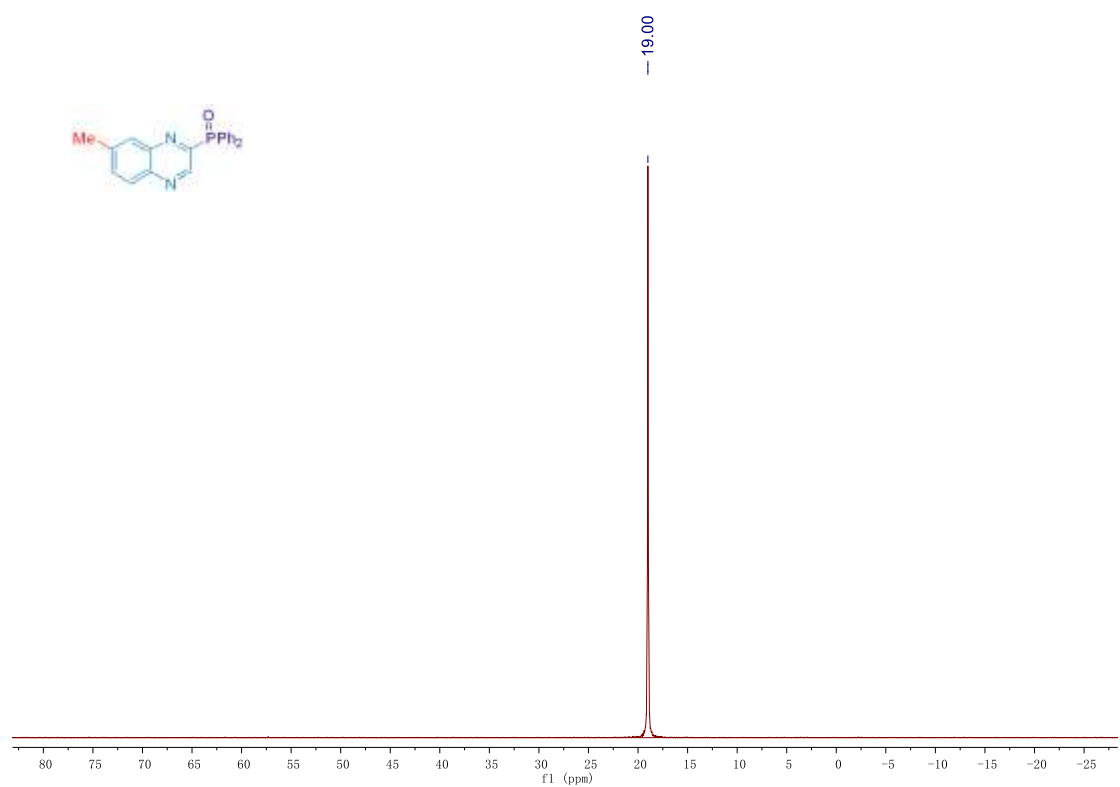

Fig.S 132 <sup>31</sup>P NMR of compound **3va-1**

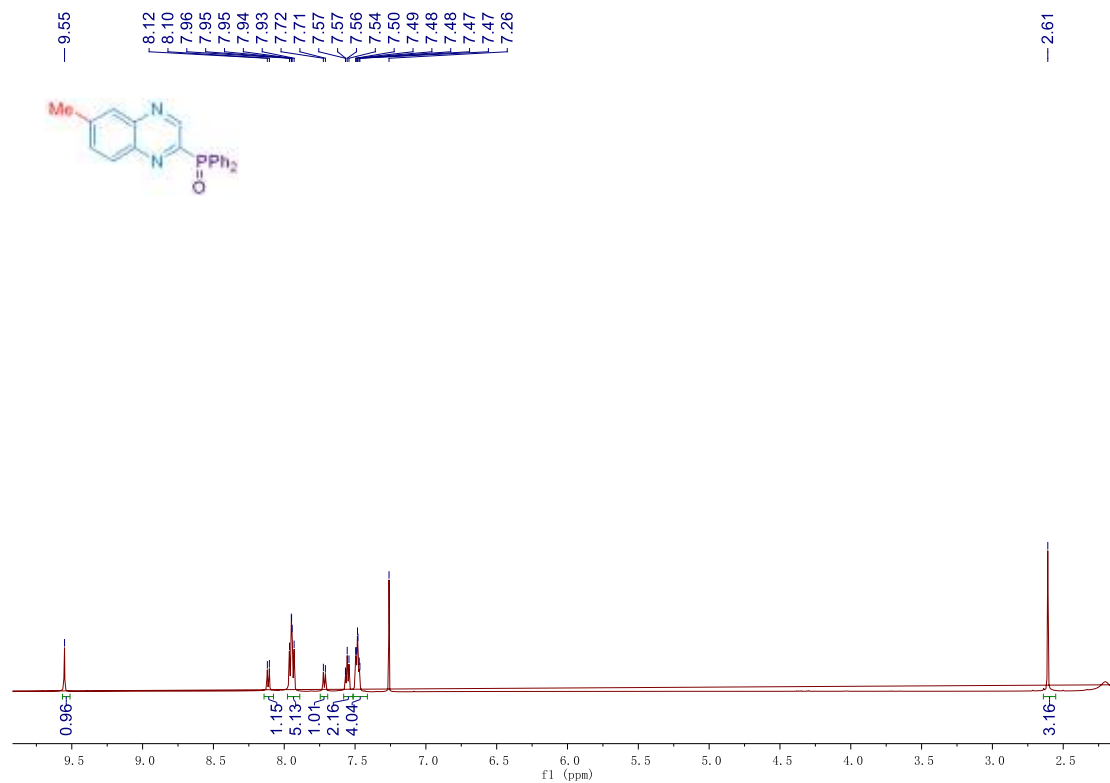

Fig.S 133  $^1\text{H NMR}$  of compound 3va-2

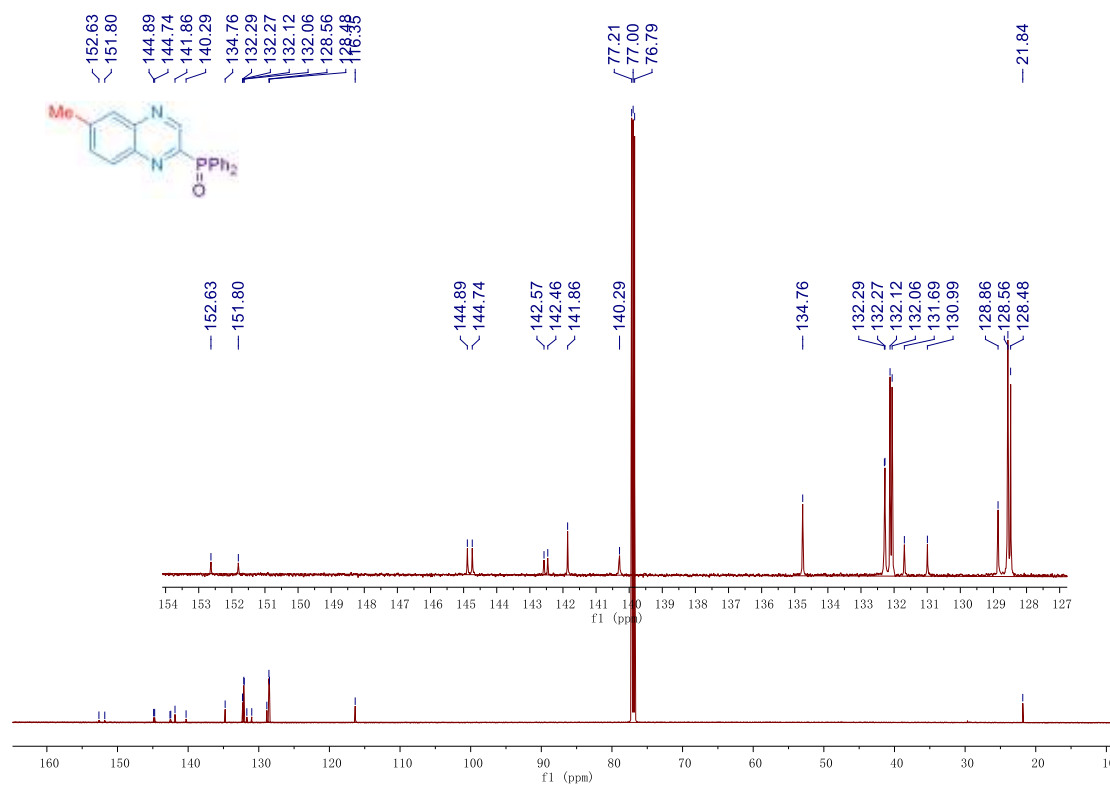

Fig.S 134  $^{13}\text{C NMR}$  of compound 3va-2

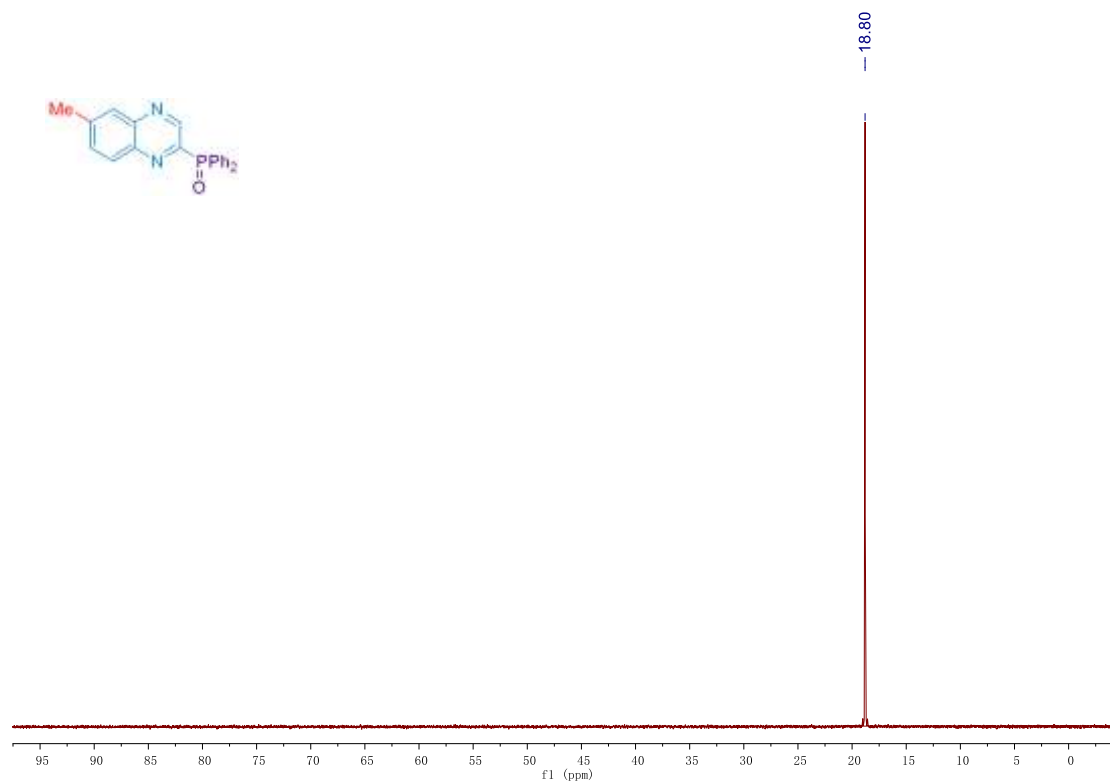

Fig.S 135  $^{31}\text{P}$  NMR of compound 3va-2

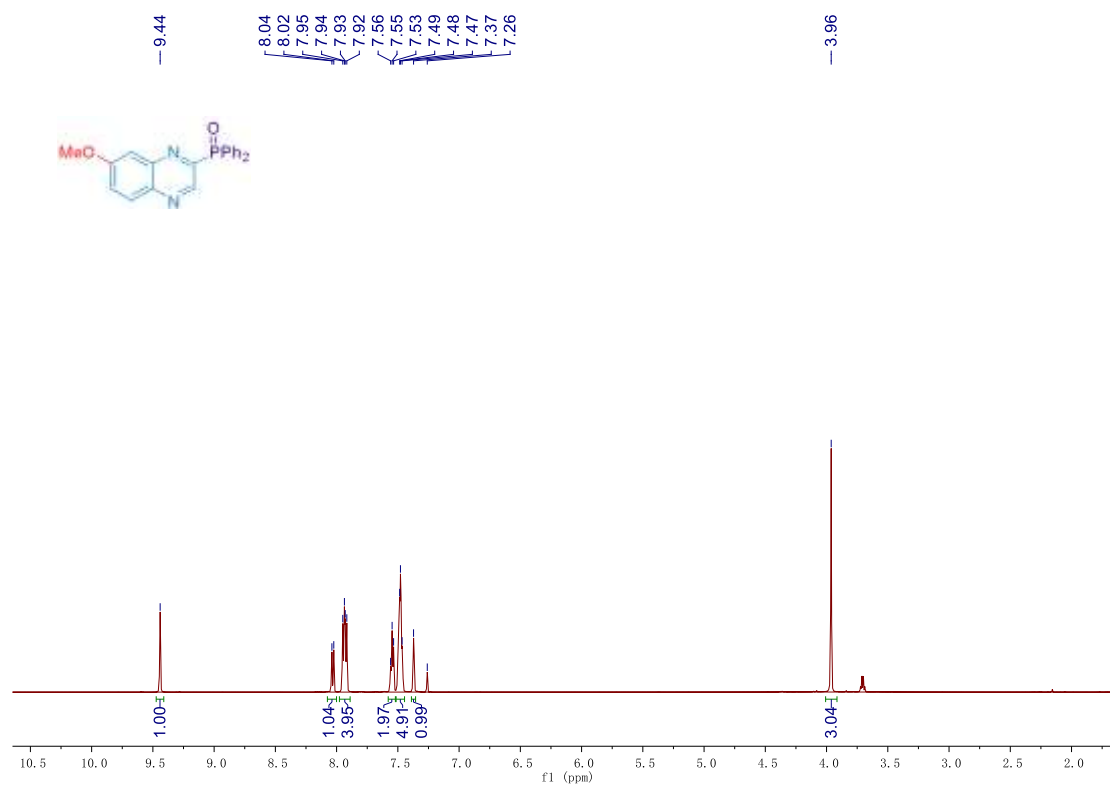

Fig.S 136  $^1\text{H}$  NMR of compound 3wa-1

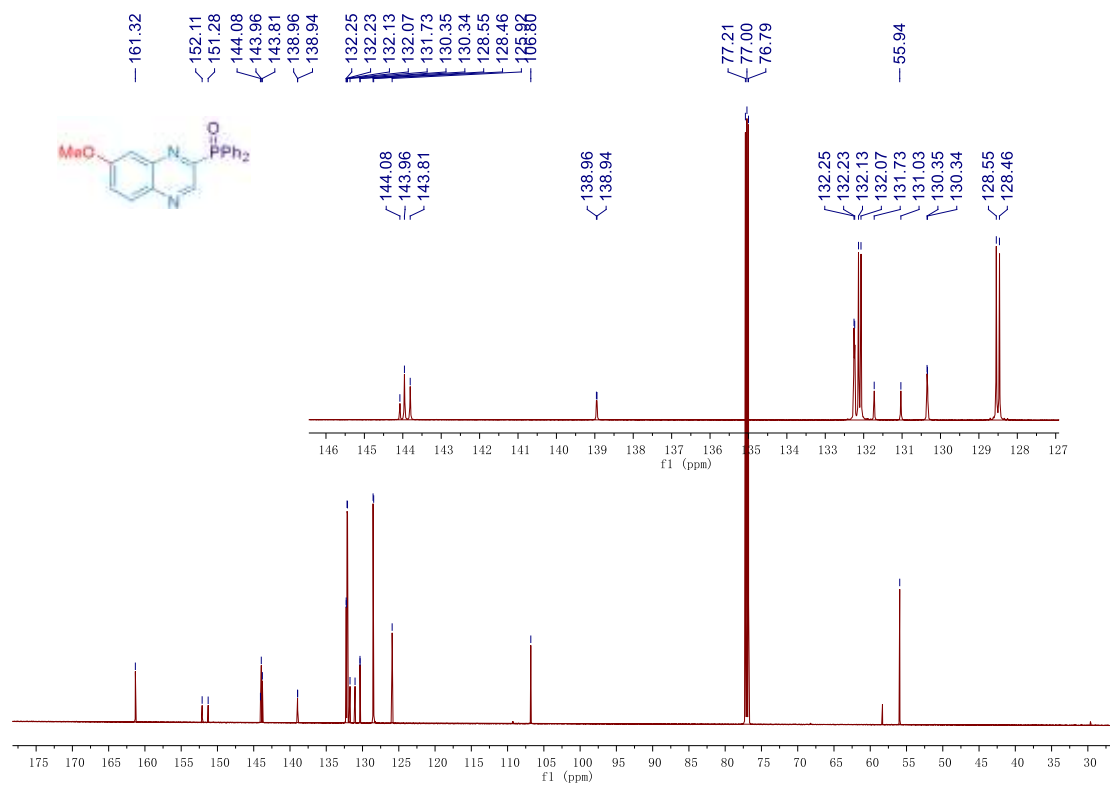

Fig.S 137 <sup>13</sup>C NMR of compound 3wa-1

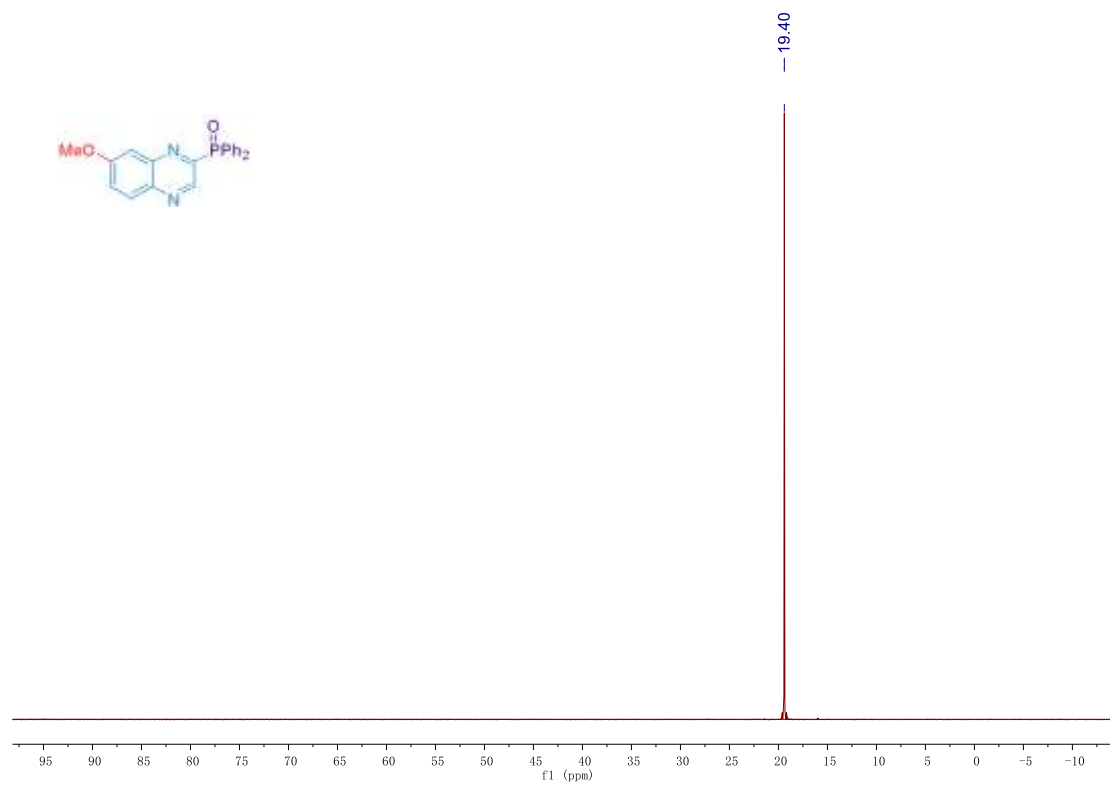

Fig.S 138 <sup>31</sup>P NMR of compound 3wa-1



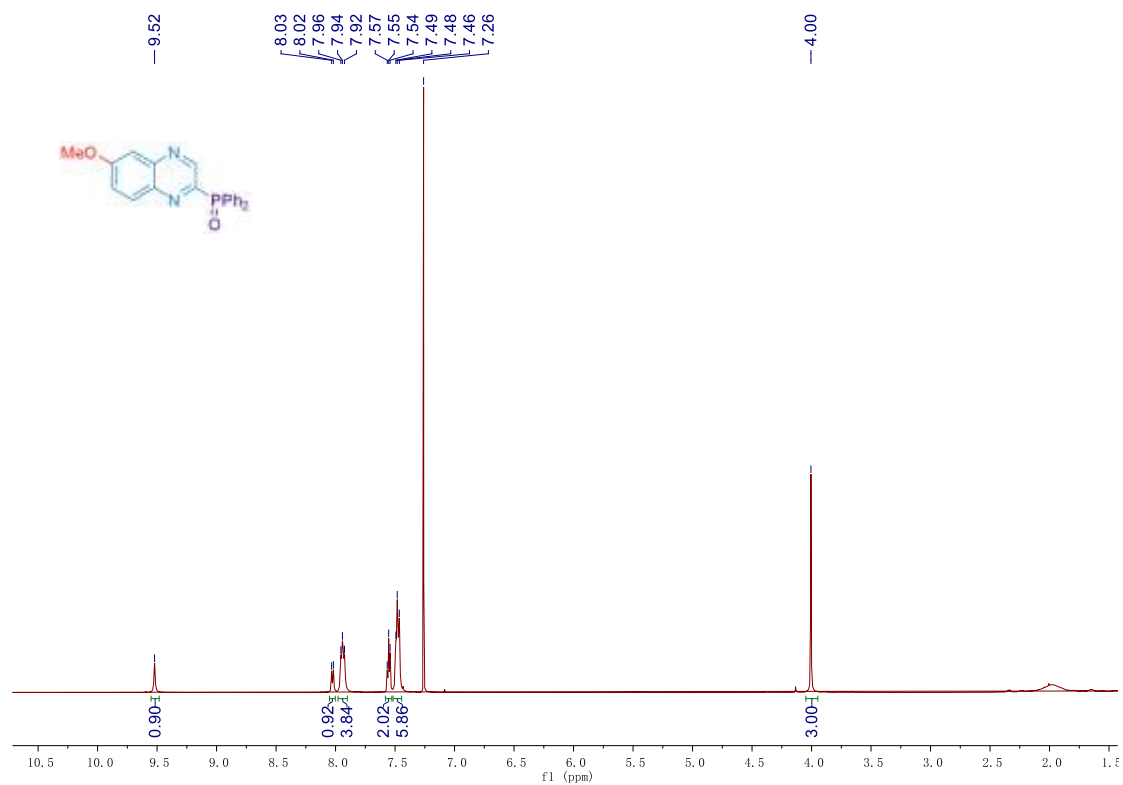

Fig.S 139 <sup>1</sup>H NMR of compound 3wa-2

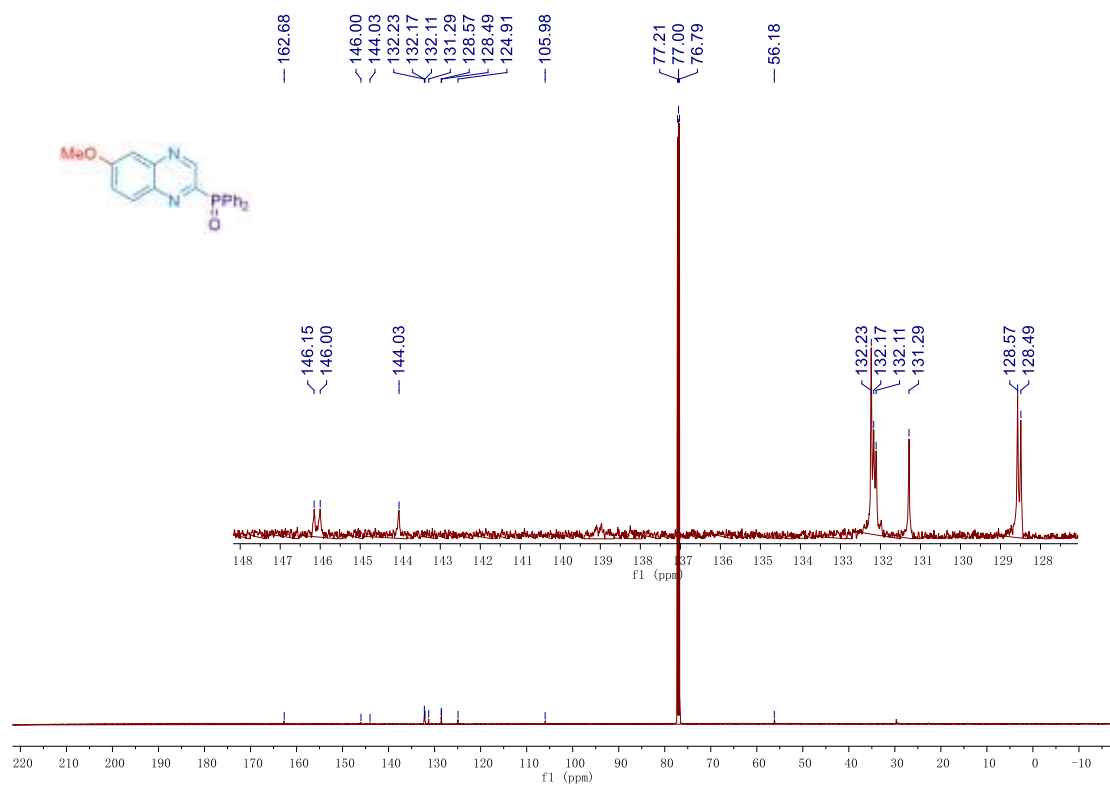

Fig.S 140 <sup>13</sup>C NMR of compound 3wa-2

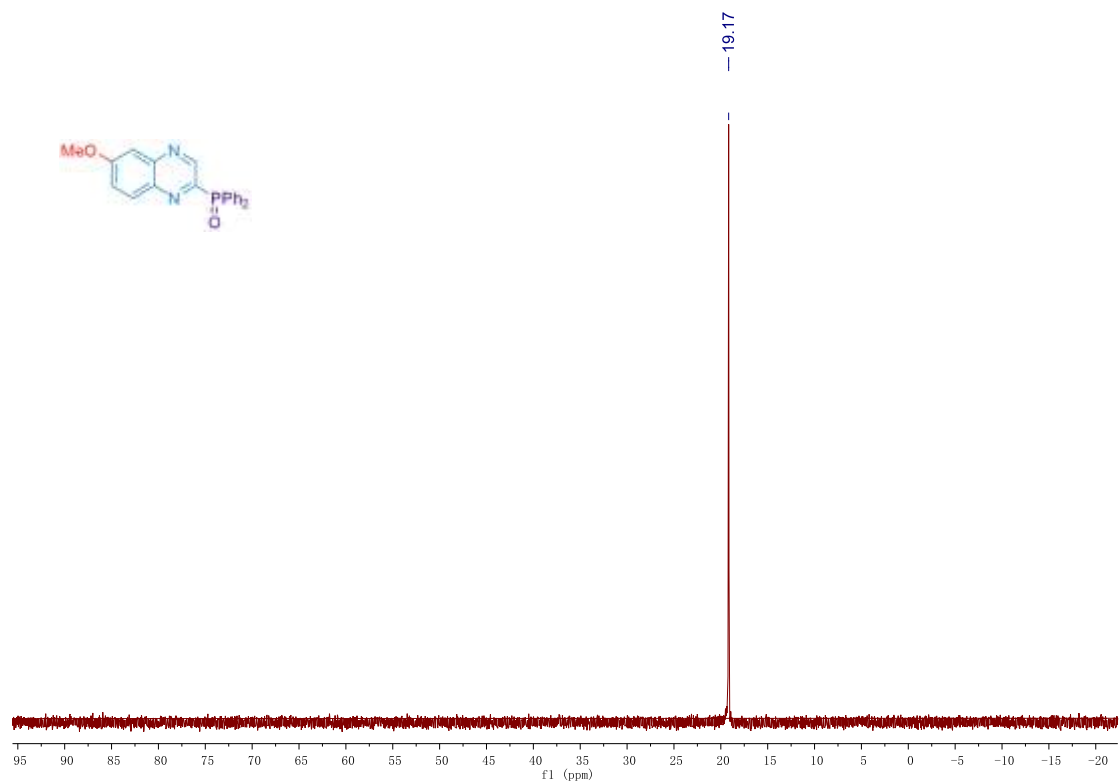

Fig.S 141  $^{31}\text{P}$  NMR of compound 3wa-2

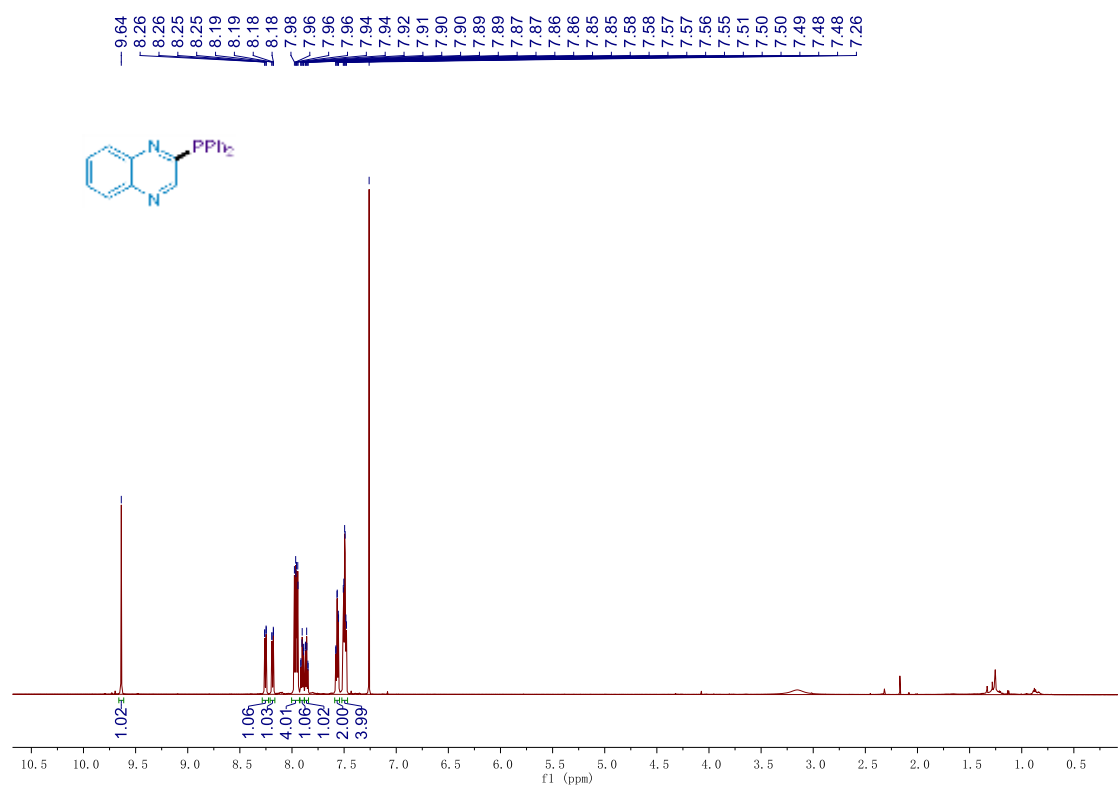

Fig.S 142  $^1\text{H}$  NMR of compound 6

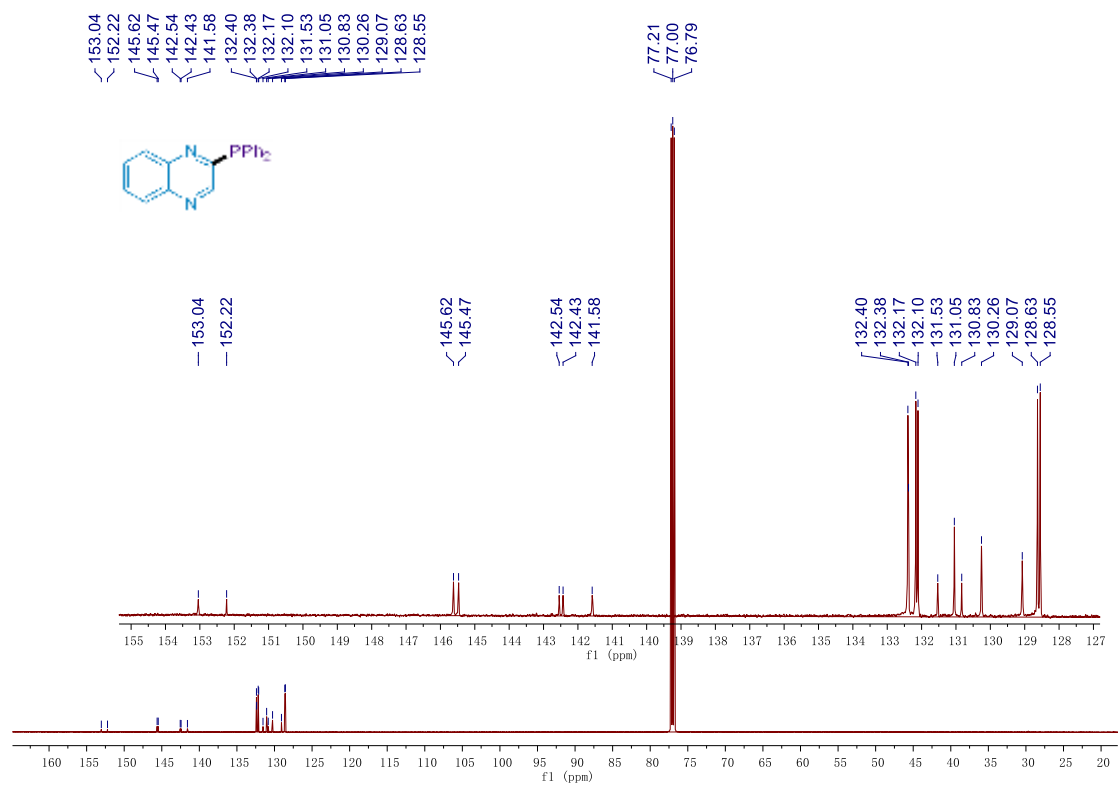

Fig.S 143  $^{13}\text{C}$  NMR of compound 6

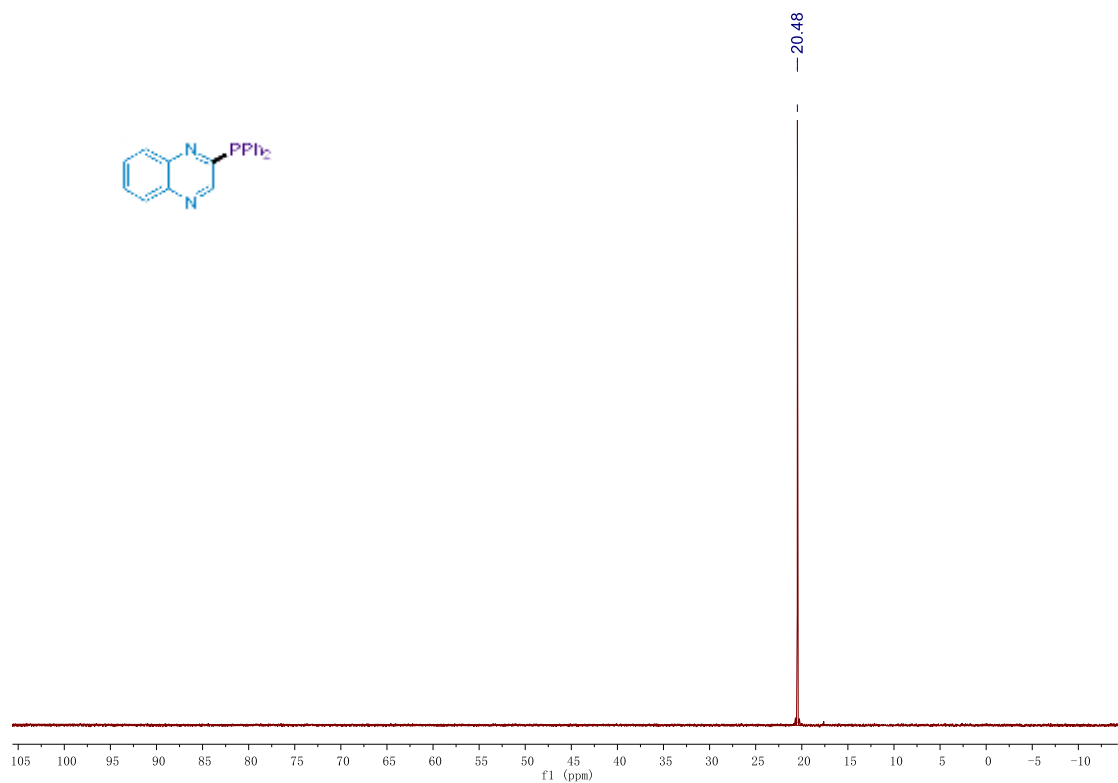

Fig.S 144  $^{31}\text{P}$  NMR of compound 6

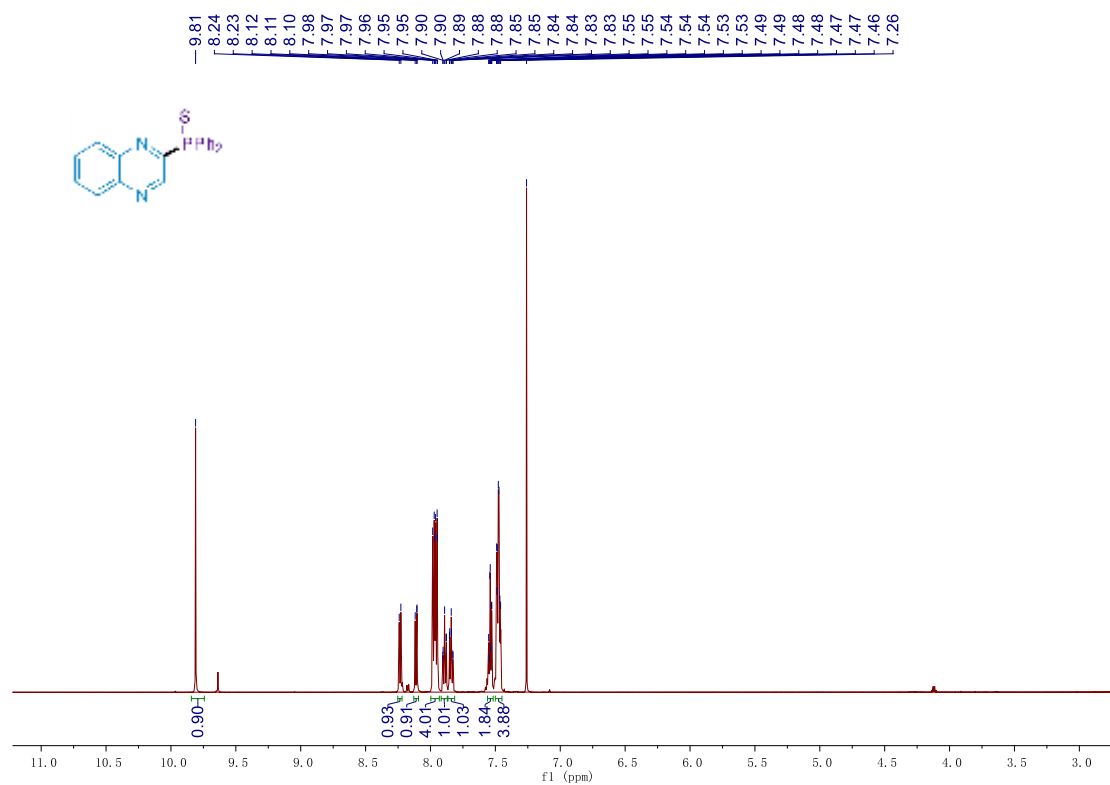

Fig.S 145  $^1\text{H}$  NMR of compound 7

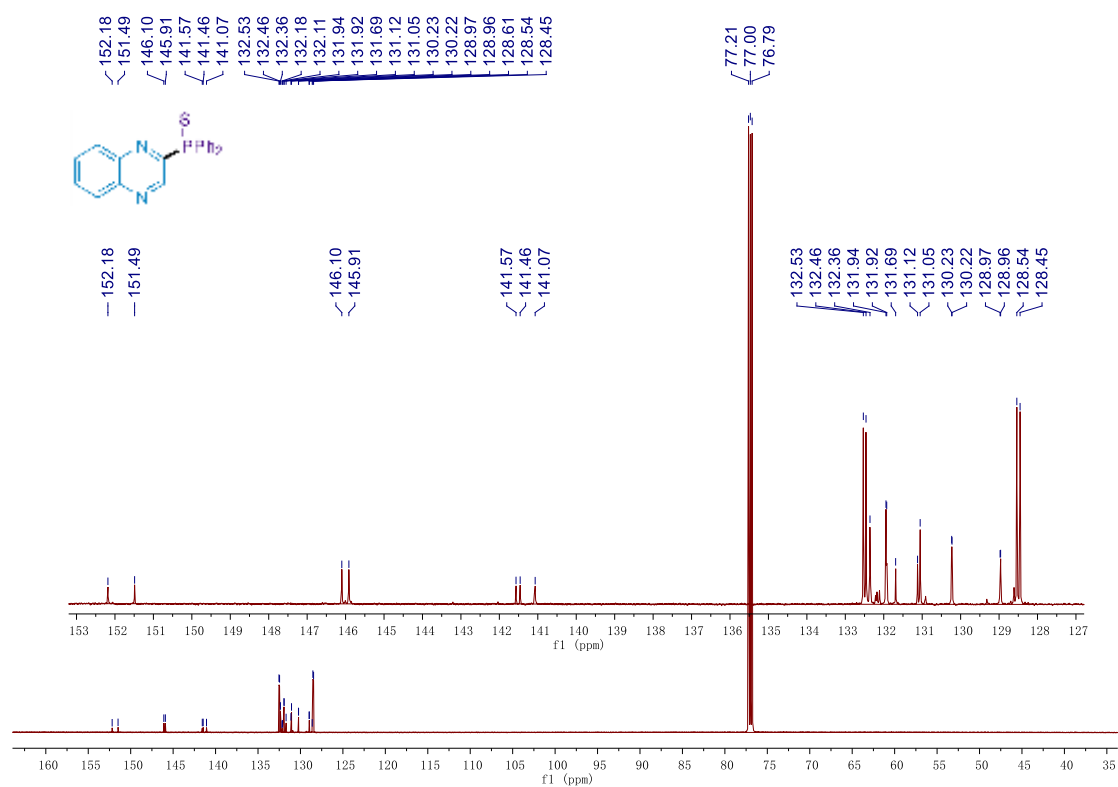

Fig.S 146  $^{13}\text{C}$  NMR of compound 7

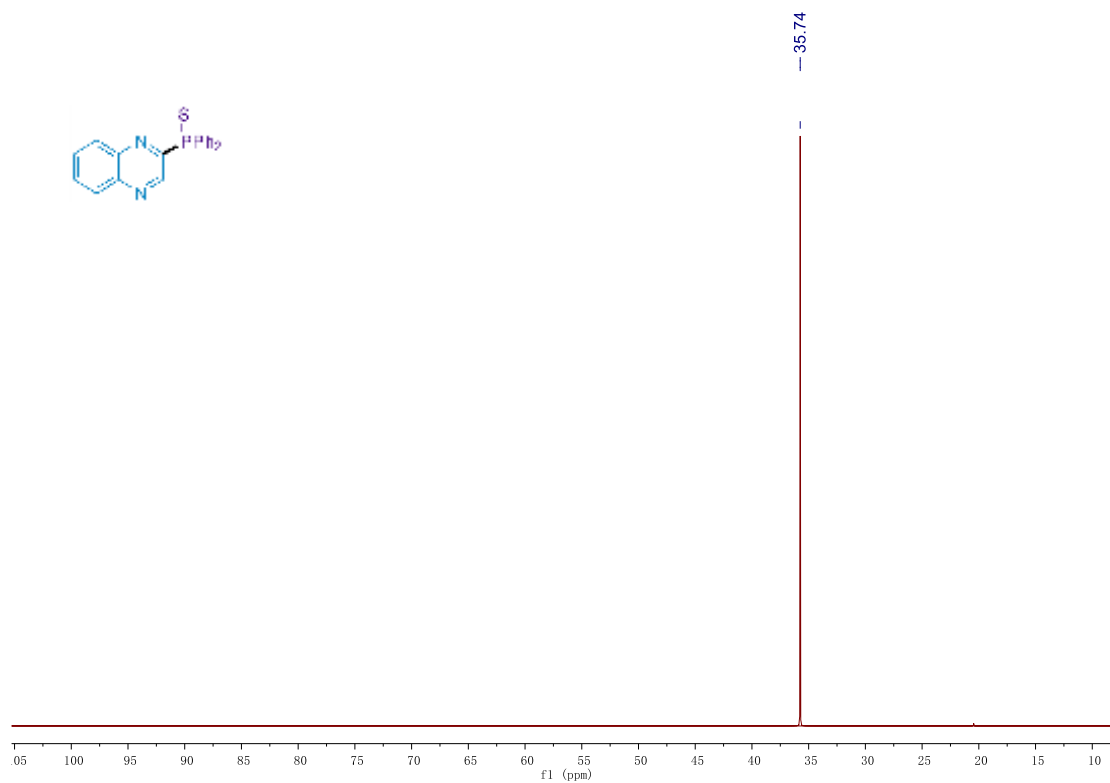

Fig.S 147  $^{31}\text{P}$  NMR of compound 7
